# Supplementary material for: Synthesis of isoquinolones via Rh-catalyzed C–H activation of substituted benzamides using air as the sole oxidant in water
Source: Royal Society of Chemistry journal article supplement (doi:10.1039/c7gc01221g), 2017-01-01
Supplement: c7gc01221g1.pdf [file c7gc01221g1.pdf]

## Supporting Information

### Synthesis of Isoquinolones via Rh-Catalyzed C–H Activation of Substituted Benzamides Using Air as the Sole Oxidant in Water

*Nitinkumar Satyadev Upadhyay, Vijaykumar H. Thorat, Ryota Sato, Annamalai Pratheepkumar, Chuang, Shih-Ching\* and Chien-Hong Cheng\**

Department of Chemistry, National Tsing Hua University, Hsinchu 30013, Taiwan

[chcheng@mx.nthu.edu.tw](mailto:chcheng@mx.nthu.edu.tw)

| <b>Table of Contents</b>                           | <b>Page No</b> |
|----------------------------------------------------|----------------|
| Experimental Section                               | S-2            |
| Synthesis of Compound <b>1a-d1</b>                 | S-3            |
| Synthesis of Compound <b>1a-d5</b>                 | S-4            |
| Reversible D/H exchange                            | S-5            |
| Intermolecular Kinetic Isotope Effect              | S-7            |
| Intramolecular Kinetic Isotope Effect              | S-9            |
| Gram-scale Synthesis of Isoquinolones              | S-10           |
| Evaluation of Green metrics of the process         | S-10           |
| <sup>1</sup> H and <sup>13</sup> C NMR and IR Data | S-14           |
| References                                         | S-26           |
| <sup>1</sup> H and <sup>13</sup> C NMR Spectra     | S-27           |
| ORTEP Diagram and X-ray Data                       | S-58           |

**General.** All reactions were conducted under a nitrogen atmosphere on a dual-manifold Schlenk line unless otherwise mentioned and in oven-dried glass wares. All solvents were dried according to known methods and distilled prior to use [1].  $[\text{Cp}^*\text{Rh}(\text{CH}_3\text{CN})_3](\text{BF}_4)_2$  was prepared from  $\text{RhCl}_3 \cdot x\text{H}_2\text{O}$  following a literature procedure.[2] Other reagents were commercially available and used as purchased.

### General Procedure for the Synthesis of Isoquinolones by Rhodium-Catalyzed C–H Activation.

To a screw-capped glass tube containing  $[\text{Cp}^*\text{Rh}(\text{CH}_3\text{CN})_3](\text{BF}_4)_2$  (4.0 mol %),  $\text{K}_2\text{CO}_3$  (0.20 mmol), *N*-alkyl benzamide **1** (0.40 mmol), and acetylene **2** (0.50 mmol) was added water (2.0 mL) via syringe and the reaction mixture was allowed to stir at 110 °C under one atmosphere of air filled in a balloon for 16 h. After completion, the reaction mixture was cooled and extracted with E.A. (ethyl acetate, 3 x 10 mL). The combined organic phase was washed with brine (10 mL) and dried over  $\text{MgSO}_4$ . The mixture was filtered through a Celite pad and the Celite pad was washed with E.A. (10 mL). After filtration and evaporation of the solvents in vacuo, the crude product was purified by a silica gel column using hexane/ethyl acetate (90/10) as eluent to yield the desired pure product **3**.

The spectral data and a copy of  $^1\text{H}$  and  $^{13}\text{C}$  NMR spectra for all compounds **3** are listed below (p. S26)

### Synthesis of 2-deuteriobromobenzene.<sup>4</sup>

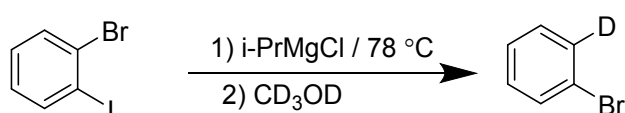

To a stirred solution of 1-bromo-2-iodobenzene (5.00 g, 17.7 mmol) in a mixture of THF and  $\text{Et}_2\text{O}$  (120 mL, 1:1) at -78 °C was added dropwise isopropyl magnesium chloride (2 M in  $\text{Et}_2\text{O}$ , 10.6 mL, 21.2 mmol). The mixture was stirred at that temperature for 2 h and then,  $\text{CD}_3\text{OD}$  (2.2 mL, 53.0 mmol) was added. The solution was slowly warmed to room temperature, then an aq. HCl (10%, 100 mL) solution was added and the resulting mixture was stirred for 30 min at room temperature. The aqueous layer was extracted with  $\text{Et}_2\text{O}$  (3 x 30 mL). The combined organic phase was dried over  $\text{MgSO}_4$ , filtered and the solvents were removed under reduced pressure. The pure 2-deuteriobromobenzene was obtained by distillation.

### Synthesis of 2-deuteriobenzoic acid.<sup>4</sup>

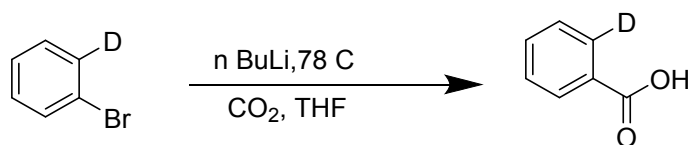

To a stirred solution of 2-deuteriobromobenzene (1.00 g, 6.32 mmol) in dry THF (20 mL) was added a solution of *n*-BuLi in *n*-hexane (3.0 mL, 2.5M, 7.59 mmol) dropwise at  $-78\text{ }^\circ\text{C}$  for 30 min. The mixture was stirred at the same temperature for 30 min, and then  $\text{CO}_2$  was bubbled through the mixture at  $-78\text{ }^\circ\text{C}$  for 30 min. The mixture was allowed to warm to ambient temperature, quenched with  $\text{H}_2\text{O}$  (20 mL), acidified to  $\text{pH} = 1$  with 1M HCl, and extracted with EtOAc ( $2 \times 30\text{ mL}$ ). The combined organic phase was dried over  $\text{MgSO}_4$ , filtered and the solvents were removed in vacuum to give product 2-deuteriobenzoic acid (550 mg, 70 %).

### Synthesis of *N*-methyl -2-deuteriobenzamide 1a-d<sub>1</sub>.<sup>4</sup>

To the solution of the 2-deuteriobenzoic acid (550 mg, 4.47 mmol) in dry E.A. (20 mL) at  $0\text{ }^\circ\text{C}$  under  $\text{N}_2$  were added dropwise oxalyl chloride (372 mg, 6.70 mmol) and a catalytic amount of dry DMF (2 drops). The reaction was allowed to stir at room temperature for 5 h. The solvent was then removed under reduced pressure to afford the corresponding crude deuterated acid chloride. Methyl amine hydrochloride (450 mg, 5.36 mmol) was added to a biphasic mixture of  $\text{K}_2\text{CO}_3$  (1.23 g, 8.92 mmol) in a 2:1 mixture of EtOAc (30 mL) and  $\text{H}_2\text{O}$  (15 mL). The resulting solution was cooled to  $0\text{ }^\circ\text{C}$  followed by dropwise addition of the unpurified deuterated acid chloride dissolved in a minimum amount of EtOAc. The reaction was allowed to stir at room temperature for 10 h. Afterwards the phases were extracted with EtOAc ( $3 \times 20\text{ mL}$ ). The combined organic phases were dried over  $\text{MgSO}_4$ , filtered and evaporated under reduced pressure to give the desired product without any further purification.  $^1\text{H}$  NMR (400 MHz,  $\text{CDCl}_3$ ):  $\delta$  7.75-7.72 (m, 1 H), 7.40-7.36 (m, 1 H), 7.31-7.7.27 (m, 2 H), 7.19 (br, 1 H, NH), 2.88 (d, 3 H). HRMS (FAB+) calcd for  $\text{C}_8\text{H}_8\text{DNO}$  136.074, found 136.073.

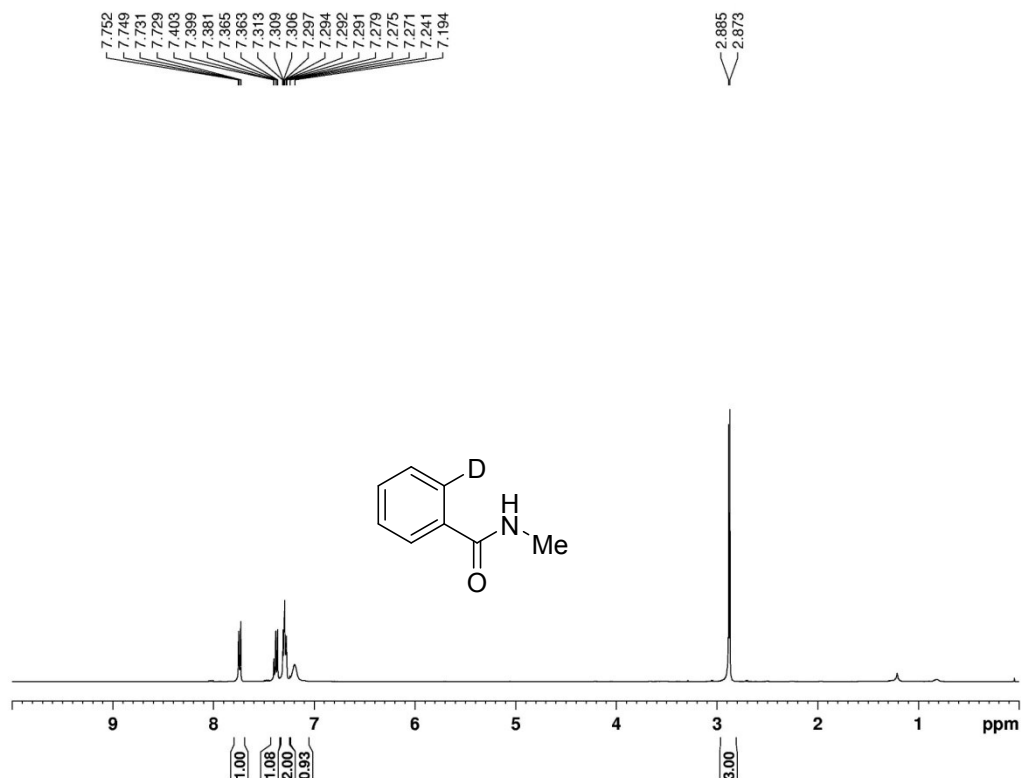

#### Synthesis of *N*-methyl-2,3,4,5,6-pentadeuteriobenzamide 1a-d<sub>5</sub>.<sup>4</sup>

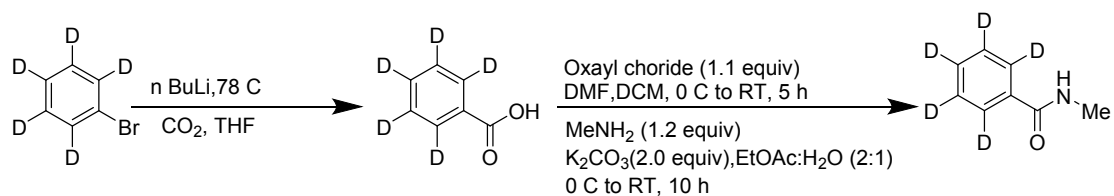

*N*-methyl-2,3,4,5,6-pentadeuteriobenzamide was prepared from 2,3,4,5,6-pentadeuteriobenzene using the same procedure as the synthesis of *N*-methyl-2-deuteriobenzamide, <sup>1</sup>H NMR (400 MHz, CDCl<sub>3</sub>): δ 6.18 (s, 1 H, NH), 2.99 (d, 3 H).

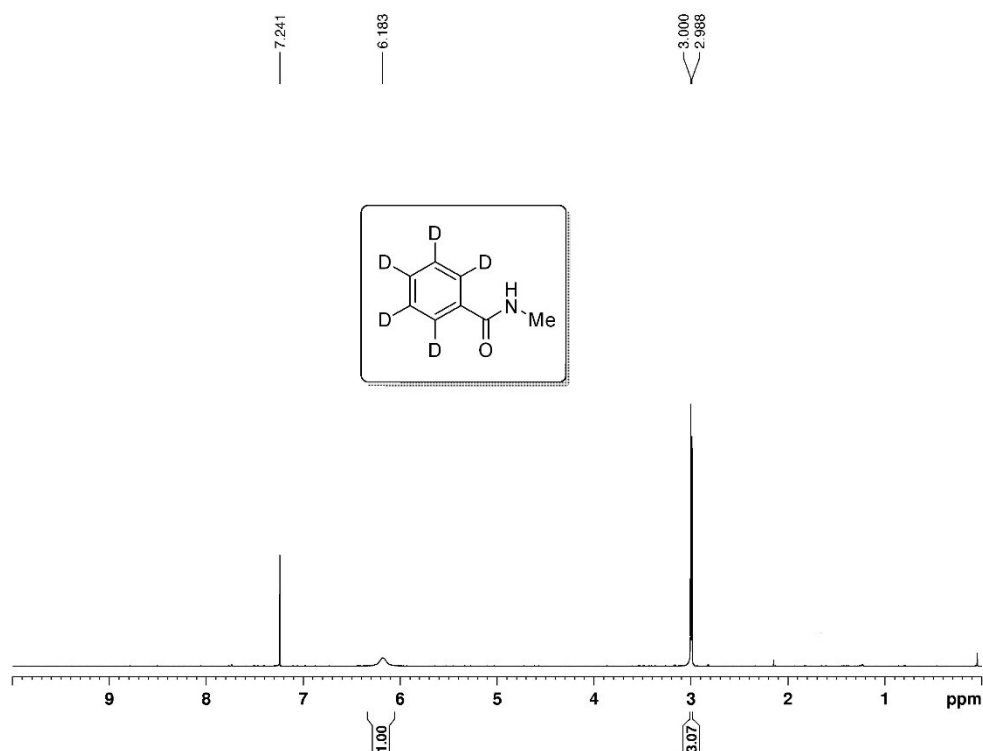

### Reversible D/H exchange:

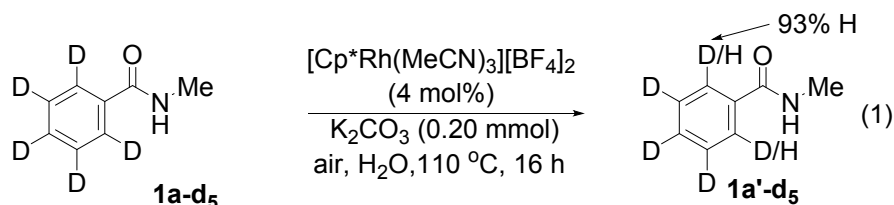

To a sealed tube containing  $[\text{Cp}^*\text{Rh}(\text{CH}_3\text{CN})_3](\text{BF}_4)_2$  (4.0 mol %),  $\text{K}_2\text{CO}_3$  (0.20 mmol), *N*-methyl-2,3,4,5,6-pentadeuteriobenzamide **1a-d<sub>5</sub>** (0.40 mmol) was added water (2.0 mL) via syringe and the reaction mixture was allowed to stir at 110 °C under one atmosphere of air filled in a balloon for 16 h, when the reaction was complete, the mixture was cooled and the reaction mixture was extracted with E.A. (3 x 10 mL). The combined organic phase was washed with brine (10 mL) and dried over  $\text{MgSO}_4$ . The mixture was filtered through a Celite pad and the Celite pad was washed with E.A. (10 mL). After filtration and evaporation of the solvents in vacuo, the crude product was purified by column chromatography on silica gel (Hexane /E.A.: 90/10) to yield **1a'-d<sub>5</sub>**.

The D/H incorporation in **1a'-d<sub>5</sub>** was determined by  $^1\text{H}$ -NMR spectroscopy.

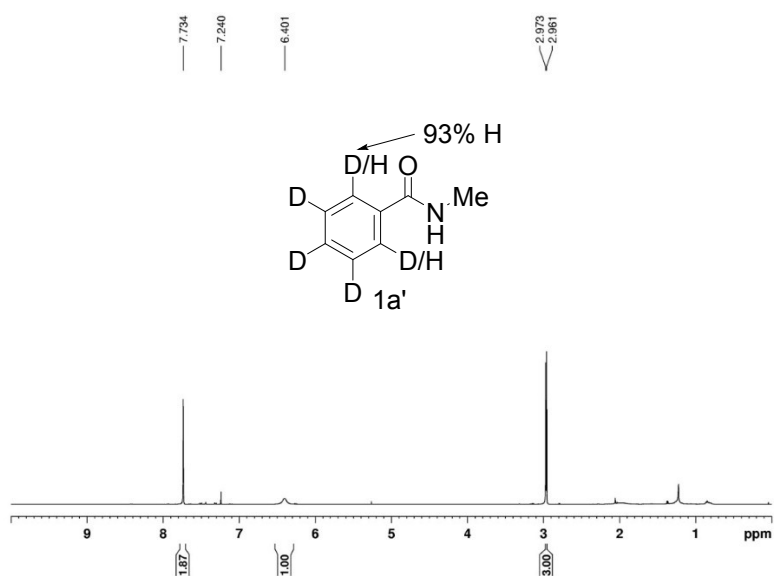

### Rh-Catalyzed Isoquinolones from **1a-d<sub>5</sub>**:

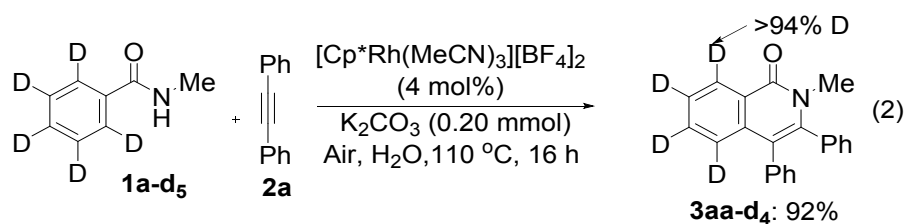

A sealed tube containing  $[\text{Cp}^*\text{Rh}(\text{CH}_3\text{CN})_3][\text{BF}_4]_2$  (4.0 mol %),  $\text{K}_2\text{CO}_3$  (0.20 mmol), *N*-methyl-2,3,4,5,6-pentadeuteriobenzamide **1a-d<sub>5</sub>** (0.40 mmol), diphenyl acetylene **2a** (0.50 mmol) then water (2.0 mL) was added to the system via syringe and the reaction mixture was allowed to stir at 110 °C under one atmosphere of air in filled a balloon for 16 h, when the reaction was complete, the mixture was cooled and the reaction mixture was diluted and extracted with E.A. (3 x 10 mL). The combined organic phase was washed with brine (10 mL) and dried over  $\text{MgSO}_4$ . The mixture was filtered through a Celite pad and the Celite pad was washed with E.A. (10 mL). After filtration and evaporation of the solvents in vacuo, the crude product was purified by column chromatography on silica gel (Hexane /E.A.: 90/10) to yield **3aa-d<sub>4</sub>**. The ortho deuterium content 92% was determined by <sup>1</sup>H-NMR spectroscopy

$^1\text{H}$  NMR (400 MHz,  $\text{CDCl}_3$ ) spectra of compound **3aa-d<sub>4</sub>**.

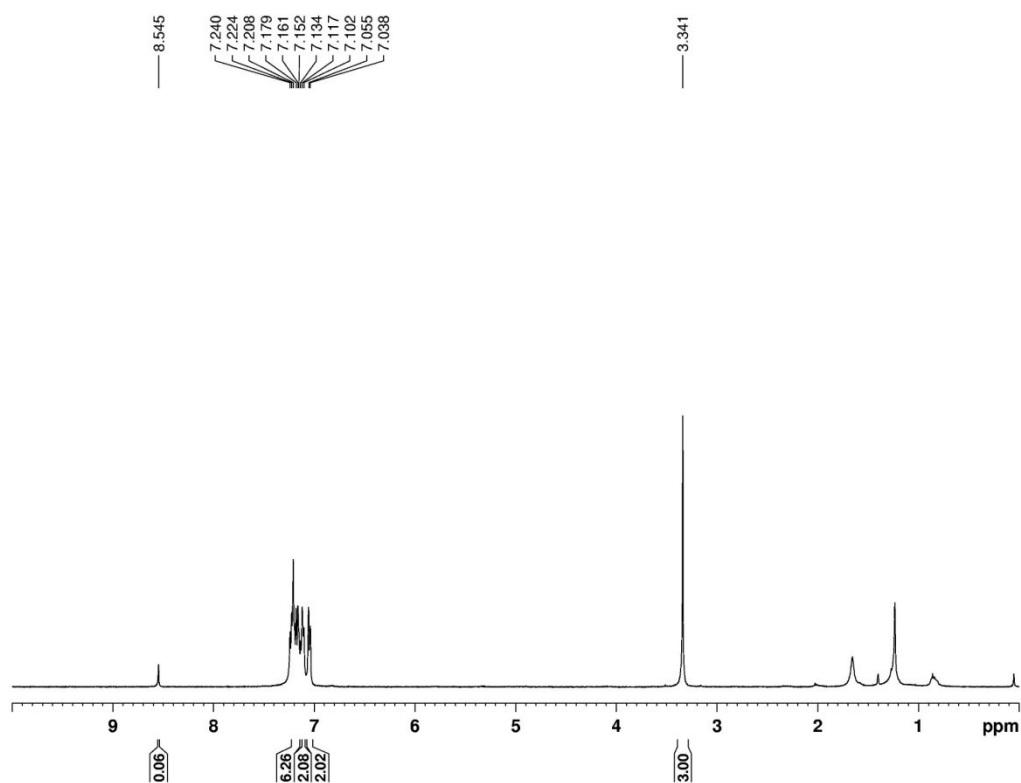

### Intermolecular Kinetic Isotope Effect

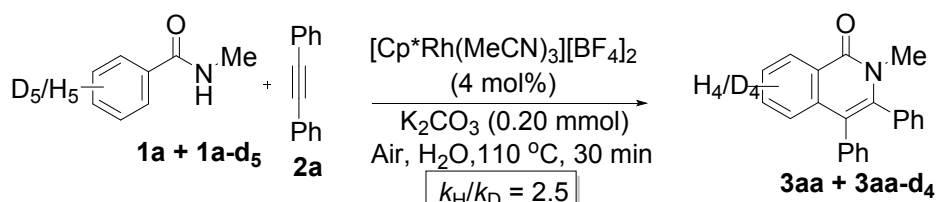

Competition Experiment:

A sealed tube containing  $[\text{Cp}^*\text{Rh}(\text{CH}_3\text{CN})_3][\text{BF}_4]_2$  (4.0 mol %),  $\text{K}_2\text{CO}_3$  (0.20 mmol), *N*-methyl benzamide **1a** (0.20 mmol), *N*-methyl-2,3,4,5,6-pentadeuteriobenzamide **1a-d<sub>5</sub>** (0.20 mmol), diphenyl acetylene **2a** (0.50 mmol) then water (2.0 mL) was added to the system via syringe and the reaction mixture was allowed to stir at 110 °C under one atmosphere of air filled in a balloon for 30 min, then the mixture was cooled and the reaction mixture was diluted and extracted with E.A. (3 x 10 mL). The combined organic phase was washed with brine (10 mL) and dried over  $\text{MgSO}_4$ . The mixture was filtered through a Celite pad and the Celite pad was washed with E.A. (10 mL). After filtration and evaporation of the solvents in vacuo, the crude product was purified by column chromatography on silica gel (Hexane /E.A.: 90/10) to afford a

mixture of products **3aa** and **3aa-d<sub>4</sub>** in 26% yield. The ratio of two compounds was determined by <sup>1</sup>H NMR integration to give intermolecular kinetic isotopic effect (KIE)

$$k_H/k_D = 2.5$$

<sup>1</sup>H NMR (400 MHz, CDCl<sub>3</sub>) spectra of compound

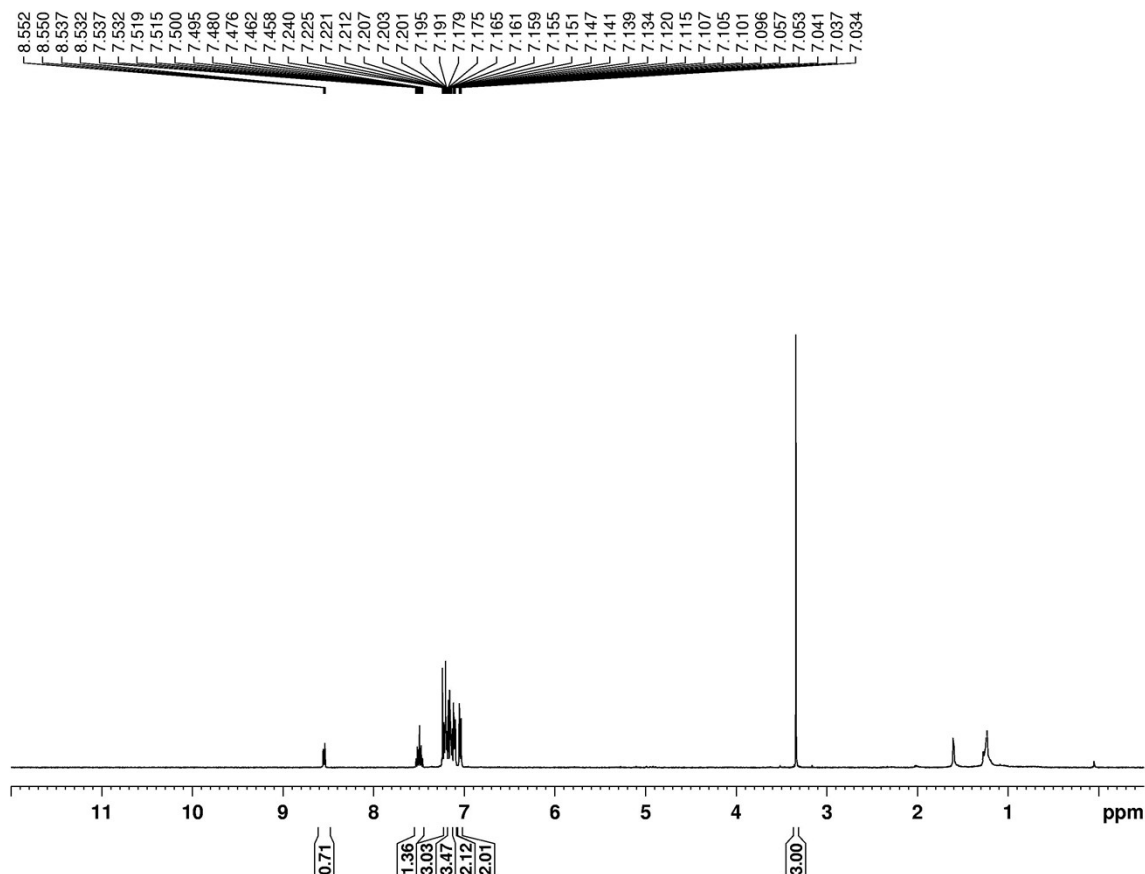

Parallel Experiment:

A sealed tube containing [Cp\*Rh(CH<sub>3</sub>CN)<sub>3</sub>](BF<sub>4</sub>)<sub>2</sub>] (4.0 mol %), K<sub>2</sub>CO<sub>3</sub> (0.20 mmol), *N*-methyl benzamide **1a** (0.40 mmol), diphenyl acetylene **2** (0.50 mmol) was sealed with a septum, then water (2.0 mL) was added to the system via syringe and similarly in another sealed tube *N*-methyl-2,3,4,5,6-pentadeuteriobenzamide **1a-d<sub>5</sub>** (0.40 mmol) was added instead of *N*-methyl benzamide **1a** (0.40 mmol), both tubes were allowed to stir at 110 °C under one atmosphere of air filled a balloon for 30 min, then the mixtures were cooled and both reaction mixtures were extracted with E.A. (3 x 10 mL). The combined organic layer was washed with brine (10 mL) and dried over MgSO<sub>4</sub>. The mixture was filtered through a Celite pad and the Celite pad was washed with E.A. (10 mL). After filtration and evaporation of the solvents in vacuo, the crude product was purified by column chromatography on silica gel (Hexane /E.A.: 90/10) to afford a mixture of products **3aa** and **3aa-d<sub>4</sub>** in 27% yield. The ratio of two compounds was determined by <sup>1</sup>H NMR integration to give intermolecular kinetic



isotopic effect (KIE)  $k_H/k_D = 1.3$

$^1\text{H}$  NMR (400 MHz,  $\text{CDCl}_3$ ) crude spectra of compound **3aa** and **3aa-d<sub>4</sub>**.

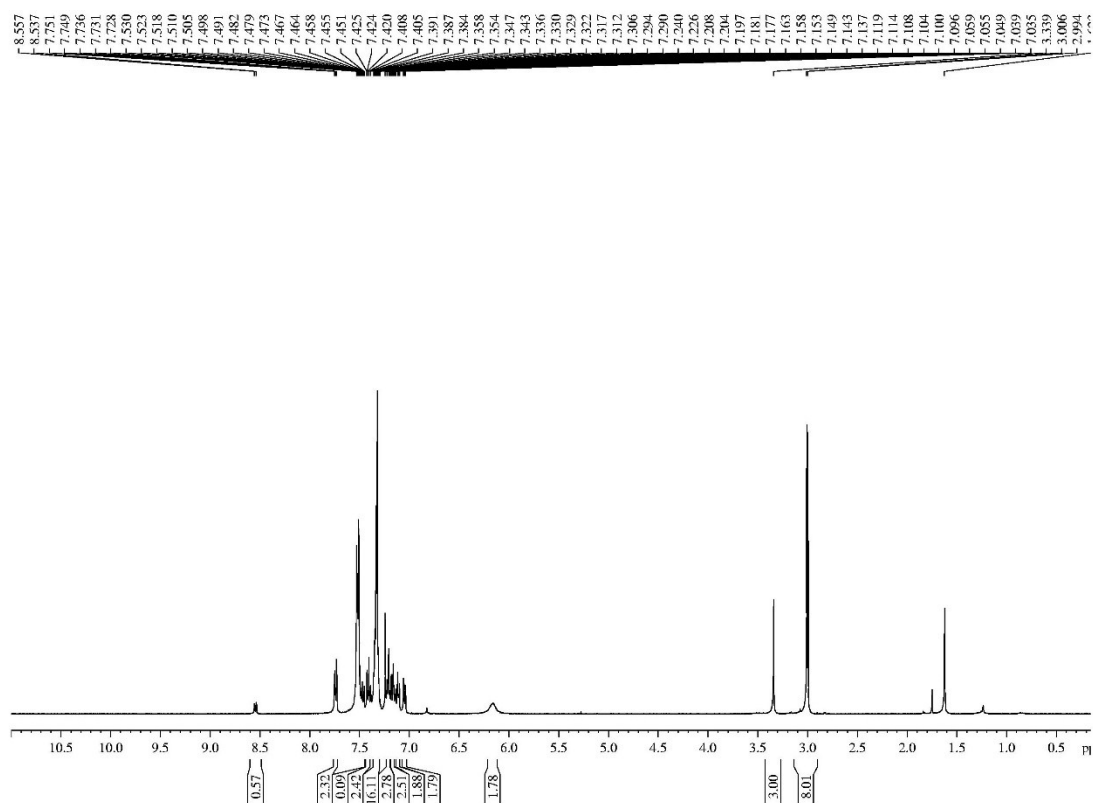

### Intramolecular Kinetic Isotope Effect

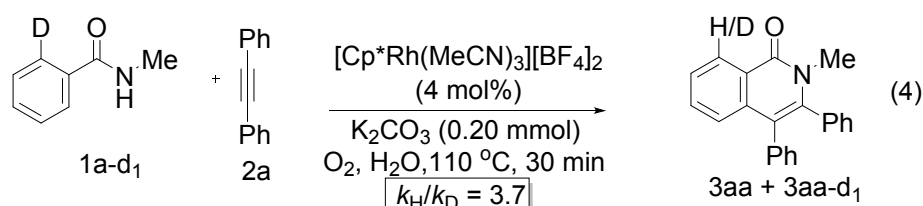

A sealed tube containing  $[\text{Cp}^*\text{Rh}(\text{CH}_3\text{CN})_3](\text{BF}_4)_2$  (4.0 mol %),  $\text{K}_2\text{CO}_3$  (0.20 mmol), *N*-methyl benzamide [**D**<sub>1</sub>]-**1a** (0.40 mmol), diphenyl acetylene **2** (0.50 mmol) was sealed with a septum, then water (2.0 mL) was added to the system via syringe and the reaction mixture was allowed to stir at 110 °C under one atmosphere of air filled a balloon for 30 min, then the mixture was cooled and the reaction mixture was extracted with E.A. (3 x 10 mL). The combined organic phase was washed with brine (10 mL) and dried over  $\text{MgSO}_4$ . The mixture was filtered through a Celite pad and the Celite pad was washed with E.A. (10 mL). After filtration and evaporation of the solvents in vacuo, the crude product was purified by column chromatography on silica gel (Hexane /E.A.: 90/10) to afford a mixture of products **3aa** and **3aa-d<sub>1</sub>** in 26%

yield. The ratio of two compounds was determined by  $^1\text{H}$  NMR integration to give intermolecular kinetic isotopic effect (KIE)  $k_H/k_D = 3.7$

$^1\text{H}$  NMR (400 MHz,  $\text{CDCl}_3$ ) spectra of compound **3aa** and **3aa-d<sub>1</sub>**.

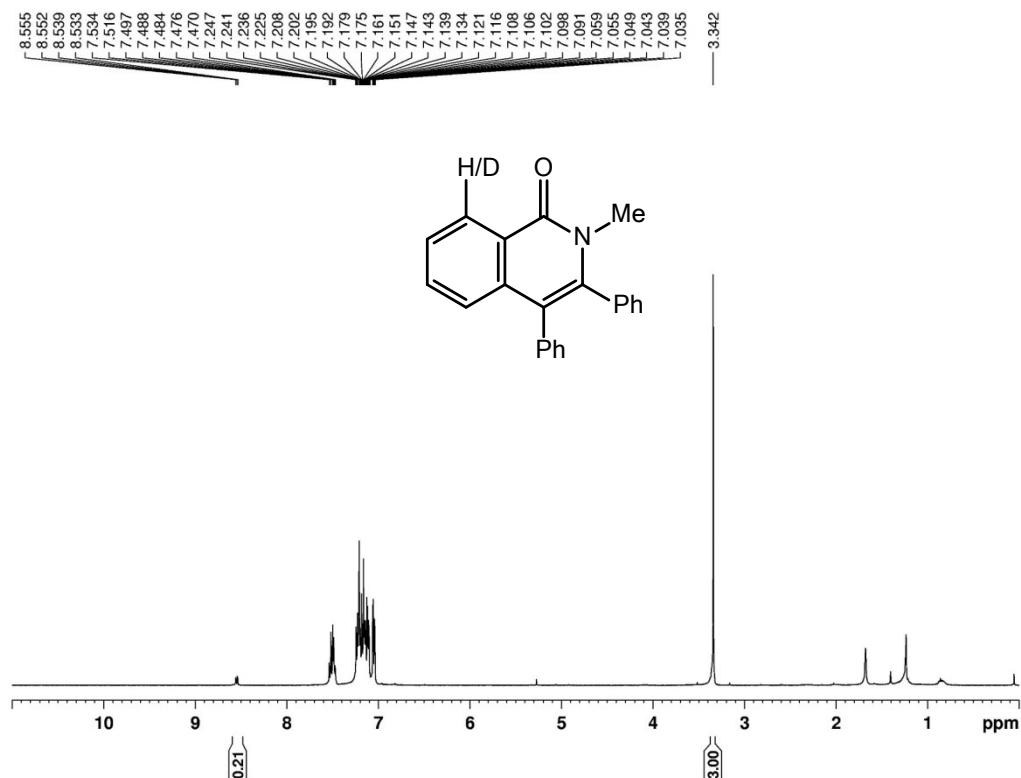

### Gram-scale Synthesis of Isoquinolones via Rhodium-Catalyzed C–H Activation.

To a screw-capped glass tube containing  $[\text{Cp}^*\text{Rh}(\text{CH}_3\text{CN})_3](\text{BF}_4)_2$  (4.0 mol %),  $\text{K}_2\text{CO}_3$  (4.4 mmol), *N*-alkyl benzamide **1a** (1g, 7.4 mmol), and acetylene **2** (1.32g, 7.4 mmol) was added water (20.0 mL) via syringe and the reaction mixture was allowed to stir at 110 °C under one atmosphere of air filled in a balloon for 20 h. After completion, the reaction solution was cooled to room temperature, the precipitate was collected and was washed with  $\text{H}_2\text{O}$  (3 x 20 mL) and dried in vacuum to give the crude product which was further purified by a silica gel column using hexane/ethyl acetate (90/10) as eluent to yield the desired pure product **3** in 86 % (1.99 g).

### Evaluation of Green metrics of the process.

Atom economy defined as “how much of the reactants remain in the final desired product”

$$\text{Atom economy (AE)} = \frac{\text{Molecular mass of desired product}}{\text{Molecular mass of all reactants}} \times 100$$

Reaction mass efficiency (RME) defined as “the percentage of the mass of the reactants that remain in the product”

$$\text{Reaction mass efficiency (RME)} = \frac{\text{mass of desired product}}{\text{mass of all reactants}} \times 100$$

### Evaluation of Green metrics for the current methodology.

#### Reaction scheme

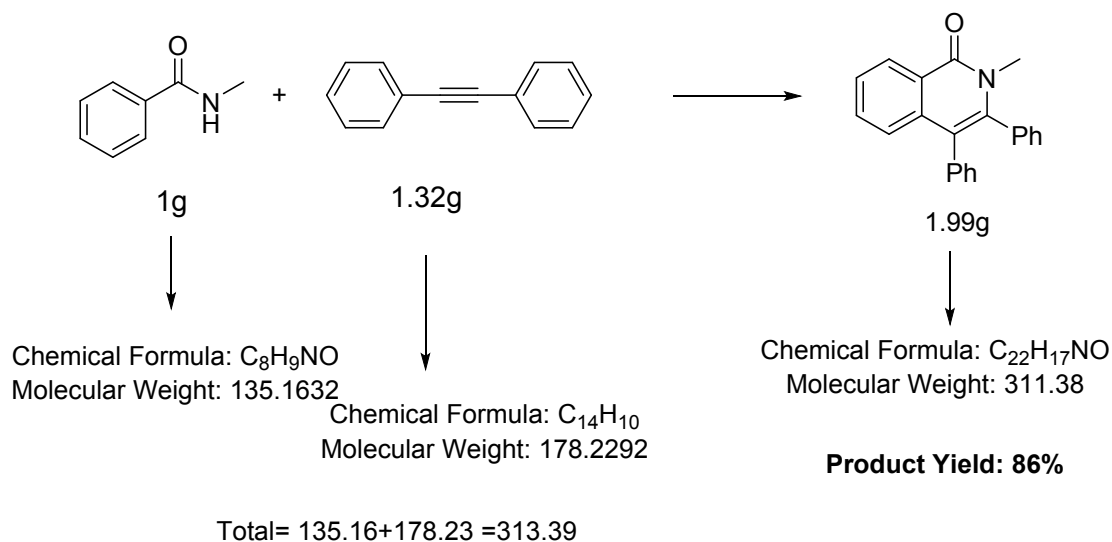

|            |                                                           |       |            |           |
|------------|-----------------------------------------------------------|-------|------------|-----------|
| Reactant 1 | N-methylbenzamide ( <b>1g</b> )                           | 1g    | 0.0074 mol | FW 135.16 |
| Reactant 2 | 1,2-diphenylethyne ( <b>1.32g</b> )                       | 1.32g | 0.0074 mol | FW 178.22 |
| Base       | Potassium Carbonate ( <b>0.51g</b> )                      | 0.51g | 0.0037 mol | FW 138.20 |
| Solvent    | H <sub>2</sub> O                                          | 20 g  | ---        | ---       |
| Auxiliary  | ---                                                       | ---   | ---        | ---       |
| Product    | 2-methyl-3,4-diphenylisoquinolin-1(2H)-one ( <b>3aa</b> ) | 1.99g | 0.0064 mol | FW 311.37 |

**Product yield= 86%**

$$\begin{aligned} \text{E-factor} &= \frac{1\text{g} + 1.32\text{g} + 20\text{g} + 0.51\text{g} - 1.99\text{g}}{1.99\text{g}} = 10.47 \text{ kg waste/1 kg product} \\ \text{Atom economy} &= \frac{311}{313} \times 100 = 99.4\% \\ \text{Atom efficiency} &= 86 \times (99.4 / 100) = 85.5\% \\ \text{Carbon efficiency} &= \frac{22}{8 + 14} \times 100 = 100\% \\ \text{Reaction mass efficiency} &= \frac{1.99\text{g}}{1\text{g} + 1.32\text{g}} \times 100 = 85.8\% \end{aligned}$$

## Evaluation of Green metrics for the reported methodology <sup>6</sup>.

### Reaction scheme

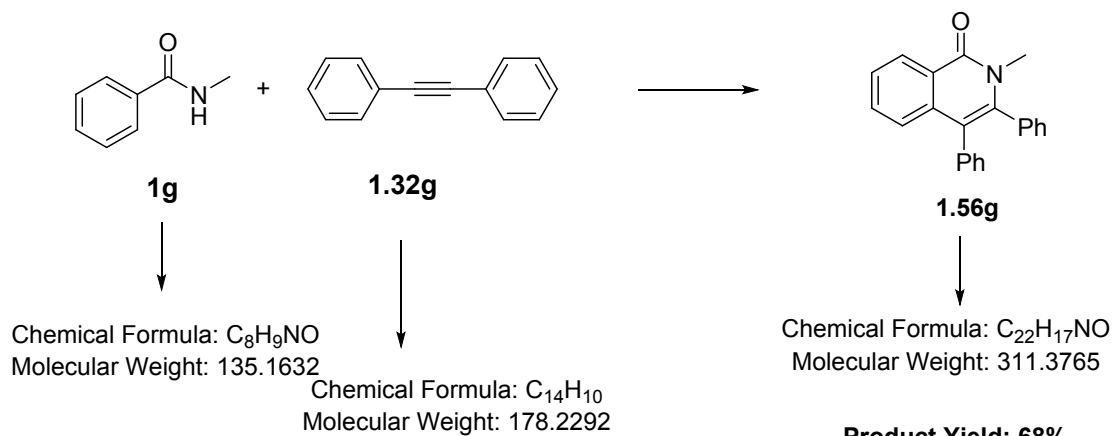

$$\text{Total} = 135.16 + 178.23 = 313.39$$

|            |                                            |                 |            |           |
|------------|--------------------------------------------|-----------------|------------|-----------|
| Reactant 1 | N-methylbenzamide ( <b>1g</b> )            | 1g              | 0.0074 mol | FW 135.16 |
| Reactant 2 | 1,2-diphenylethyne ( <b>1.32g</b> )        | 1.32g           | 0.0074 mol | FW 178.22 |
| Oxidant    | Cu(OAc) <sub>2</sub> ·H <sub>2</sub> O     | 2.95g           | 0.0148 mol | FW 199.65 |
| Solvent    | <i>t</i> -amyl alcohol                     | 40.25 g (50 mL) | ---        | ---       |
| Auxiliary  | ---                                        | ---             | ---        | ---       |
| Product    | 2-methyl-3,4-diphenylisoquinolin-1(2H)-one | 1.56g           | 0.005 mol  | FW 311.37 |

### Product yield= 68%

$$\text{E-factor} = \frac{1\text{g} + 1.32\text{g} + 40.25\text{g} + 2.95\text{g} - 1.56\text{g}}{1.56\text{g}} = 28.18 \text{ kg waste/1 kg product}$$

$$\text{Atom economy} = \frac{311}{313} \times 100 = 99.4\%$$

$$\text{Atom efficiency} = 68 \times (99.4 / 100) = 67.6\%$$

$$\text{Carbon efficiency} = \frac{22}{8 + 14} \times 100 = 100\%$$

$$\text{Reaction mass efficiency} = \frac{1.56\text{g}}{1\text{g} + 1.32\text{g}} \times 100 = 67.2\%$$

### Procedure for the Synthesis of 5,6,13-Triphenyl-8H-isoquinolino[3,2-a]isoquinolin-8-one (3ta).

To a screw-capped glass tube containing  $[\text{Cp}^*\text{Rh}(\text{CH}_3\text{CN})_3](\text{BF}_4)_2$  (4.0 mol %),  $\text{K}_2\text{CO}_3$  (0.20 mmol), primary benzamide **1t** (0.40 mmol), and diphenylacetylene **2a** (1.50 mmol) was added water (3.0 mL) via syringe and the reaction mixture was allowed to stir at 110 °C under one atmosphere of air filled in a balloon for 16 h. After completion, the reaction mixture was cooled and extracted with ethyl acetate, (3 x 10 mL). The combined organic phase was washed with brine (10 mL) and dried over  $\text{MgSO}_4$ . The mixture was filtered through a Celite pad and the Celite pad was washed with E.A. (10 mL). After filtration and evaporation of the solvents in vacuo, the crude product was purified by a silica gel column using hexane/ethyl acetate (80/20) as eluent to yield the desired pure product **3ta**.

The spectral data and a copy of  $^1\text{H}$  and  $^{13}\text{C}$  NMR spectra for all compounds **3ta** are listed below (p. S56)

### 2-Methyl-3,4-diphenylisoquinolin-1(2H)-one (3aa)

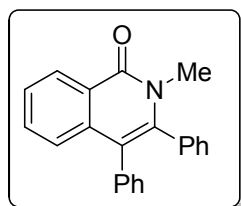

White solid, m.p. 245-248 °C;  $^1\text{H}$  NMR (400 MHz,  $\text{CDCl}_3$ ):  $\delta$  8.55 (d,  $J = 9.2$  Hz 1 H), 7.52-7.45 (m, 2 H), 7.23-7.09 (m, 9 H), 7.05-7.03 (m, 2 H), 3.34 (s, 3 H);  $^{13}\text{C}$  NMR (100 MHz,  $\text{CDCl}_3$ ):  $\delta$  162.7 (C), 141.2 (C), 137.1 (C), 136.4 (C), 135.0 (C), 131.9 (CH), 131.5 (2CH), 129.9 (2CH), 128.1 (3CH), 127.8 (2CH), 127.7 (CH), 126.7 (CH), 126.5 (CH), 125.3 (CH), 124.9 (C), 118.8 (C), 34.3 ( $\text{CH}_3$ ); HRMS (ESI) cal. for  $\text{C}_{22}\text{H}_{17}\text{NO}$  311.1310, found 311.1310; IR (KBr): 2923, 1648, 1604, 1550, 1425, 1030, 925, 698  $\text{cm}^{-1}$

### 2-Ethyl-3,4-diphenylisoquinolin-1(2H)-one (3ba)

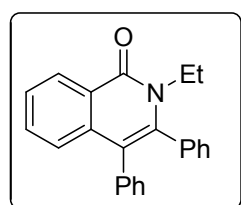

Yellow solid, m.p. 246-248 °C;  $^1\text{H}$  NMR (400 MHz,  $\text{CDCl}_3$ ):  $\delta$  8.55-8.53 (m, 1 H), 7.51-7.45 (m, 2 H), 7.23-7.09 (m, 9 H), 7.04-7.02 (m, 2 H), 3.96-3.90 (q, 2 H), 1.15 (t,  $J = 14.0$  Hz 3 H);  $^{13}\text{C}$  NMR (100 MHz,  $\text{CDCl}_3$ ):  $\delta$  160.0 (C), 141.0 (C), 137.1 (C), 136.5 (C), 134.7 (C), 131.9 (CH), 131.5 (2 CH), 130.1 (2 CH), 128.1 (CH), 127.8 (2 CH), 127.8 (2 CH), 127.7 (CH), 126.7 (CH), 126.5 (CH), 125.3

(CH), 125.2 (C), 119.0 (C), 41.3 (CH<sub>2</sub>), 14.1 (CH<sub>3</sub>); **HRMS** (ESI) cal. for C<sub>23</sub>H<sub>19</sub>NO 325.1467, found 325.1467; IR (KBr): 2923, 1645, 1604, 1548, 1427, 1080, 925, 771, 698 cm<sup>-1</sup>

### 2,3,4-Triphenylisoquinolin-1(2H)-one (3ca)

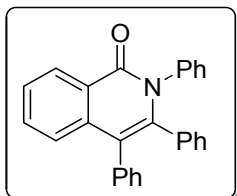

White solid, m.p. 167-170 °C; **<sup>1</sup>H NMR** (400 MHz, CDCl<sub>3</sub>): δ 8.56 (d, *J* = 8.0 Hz 1 H), 7.59-7.49 (m, 2 H), 7.25-7.08 (m, 11 H), 6.87 (s, 5 H); **<sup>13</sup>C NMR** (100 MHz, CDCl<sub>3</sub>): δ 162.6 (C), 141.0 (C), 139.4 (C), 137.6 (C), 136.3 (C), 134.7 (CH), 132.5 (CH), 131.6 (2 CH), 131.0 (2 CH), 129.5 (2 CH), 128.5 (2 CH), 128.2 (CH), 127.9 (2 CH), 127.5 (CH), 127.2 (CH), 127.0 (2 CH), 126.8 (CH), 125.5 (2 CH), 118.8 (C); **HRMS** (ESI) cal. for C<sub>27</sub>H<sub>19</sub>NO 373.1467, found 373.1466; IR (KBr): 2923, 1648, 1604, 1550, 1425, 1030, 925, 698 cm<sup>-1</sup>

### 2-Benzyl-3,4-diphenylisoquinolin-1(2H)-one (3da)

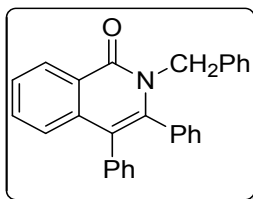

Yellow solid, m.p. 167-170 °C; **<sup>1</sup>H NMR** (400 MHz, CDCl<sub>3</sub>): δ 8.61-8.59 (m 1 H), 7.56-7.19 (m, 2 H), 7.17-7.09 (m, 8 H), 7.06-7.02 (m, 4 H), 6.89-6.82 (m, 4 H), 5.20 (s, 2 H); **<sup>13</sup>C NMR** (100 MHz, CDCl<sub>3</sub>): δ 162.6 (C), 141.3 (C), 137.7 (C), 137.3 (C), 136.4 (C), 134.3 (C), 132.2 (CH), 131.4 (2 CH), 130.4 (2 CH), 128.2 (CH), 128.1 (2 CH), 128.0 (CH), 127.8 (CH), 127.5 (2 CH), 126.9 (2 CH), 126.8 (2 CH), 126.7 (CH), 126.7 (CH), 125.4 (CH), 125.1 (C), 119.4 (C), 49.0 (CH<sub>2</sub>); **HRMS** (ESI) cal. for C<sub>28</sub>H<sub>21</sub>NO 387.1623, found 387.1620; IR (KBr): 2854, 1645, 1604, 1548, 1427, 1080, 925, 771, 698 cm<sup>-1</sup>

### 2-(4-Methoxyphenyl)-3,4-diphenylisoquinolin-1(2H)-one (3ea)

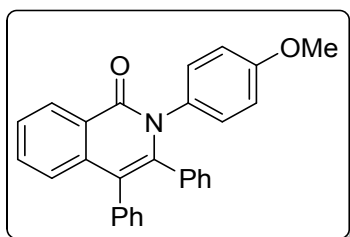

Yellow solid, m.p. 219-221 °C; **<sup>1</sup>H NMR** (400 MHz, CDCl<sub>3</sub>): δ 8.59-8.56 (m, 1 H), 7.57-7.47 (m, 2 H), 7.26-7.11 (m, 6 H), 7.04-6.90 (m, 2 H), 6.90 (m, 5 H), 6.74-6.70 (m, 2 H), 3.66 (s, 3 H); **<sup>13</sup>C NMR** (100 MHz, CDCl<sub>3</sub>): δ

162.7 (C), 158.3 (C), 141.2 (C), 137.4 (C), 136.2 (C), 134.7 (C), 132.3 (CH), 132.0 (C), 131.4 (2 CH), 130.8 (2 CH), 130.2 (2 CH), 128.1 (CH), 127.8 (2 CH), 127.0 (2 CH), 127.0 (2 CH), 126.6 (CH), 125.4 (CH), 125.3 (CH), 118.5 (C), 113.7 (CH), 55.1 (CH<sub>3</sub>); **HRMS** (ESI) cal. for C<sub>28</sub>H<sub>21</sub>NO<sub>2</sub> 403.1572, found 403.1572; IR (KBr): 2923, 1655, 1604, 1508, 1323, 1229, 1030, 771 cm<sup>-1</sup>

### 2,6-Dimethyl-3,4-diphenylisoquinolin-1(2H)-one (3fa)

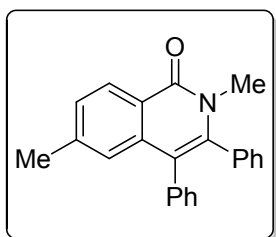

White solid, m.p. 263-265 °C; **<sup>1</sup>H NMR** (400 MHz, CDCl<sub>3</sub>): δ 8.44 (d, *J* = 8.0 Hz 1 H), 7.31-7.29 (d, *J* = 8.0 Hz 1 H), 7.21-7.02 (m, 10 H), 6.90 (s, 1 H), 3.32 (s, 3 H), 2.32 (s, 3 H); **<sup>13</sup>C NMR** (100 MHz, CDCl<sub>3</sub>): δ 162.6 (C), 142.4 (C), 141.2 (C), 137.1 (C), 136.5 (C), 135.1 (C), 131.4 (2 CH), 131.3 (2 CH), 129.8 (2 CH), 128.1 (2CH), 128.0 (CH), 127.8 (CH), 126.6 (CH), 126.4 (CH), 124.9 (CH), 122.7 (C), 118.6 (C), 34.1 (CH<sub>3</sub>), 21.8 (CH<sub>3</sub>); **HRMS** (ESI) cal. for C<sub>23</sub>H<sub>19</sub>NO 325.1467, found 325.1469; IR (KBr): 2931,1645, 1604, 1548, 1425, 1080, 925, 830, 771, 698 cm<sup>-1</sup>

### 6-Methoxy-2-methyl-3,4-diphenylisoquinolin-1(2H)-one (3ga)

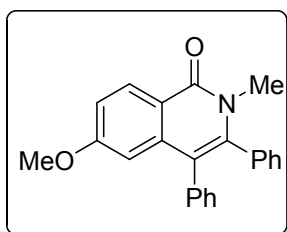

Yellow solid, m.p. 220-223 °C, **<sup>1</sup>H NMR** (400 MHz, CDCl<sub>3</sub>): δ 8.47 (d, *J* = 8.8 Hz 1 H), 7.22-7.23 (m,10 H), 6.50-6.49 (m, 1 H), 3.65 (s, 3 H), 3.30 (s, 3 H); **<sup>13</sup>C NMR** (100 MHz, CDCl<sub>3</sub>): δ 162.5 (C), 162.3 (C), 141.8 (C), 139.1 (C), 136.4 (C), 135.1 (C), 131.4 (2 CH), 129.9 (2 CH), 129.8 (2 CH), 128.1 (2 CH), 127.8 (2 CH), 126.7 (CH), 118.9 (C), 118.5 (C), 115.4 (CH), 106.9 (CH), 55.1 (CH<sub>3</sub>), 34.0 (CH<sub>3</sub>); **HRMS** (ESI) cal for C<sub>23</sub>H<sub>19</sub>NO<sub>2</sub> 341.1416, found 341.1414; IR (KBr): 2923, 1645, 1604, 1548, 1427, 1030, 1080, 925, 813, 771, 698 cm<sup>-1</sup>

### 6-Chloro-2-methyl-3,4-diphenylisoquinolin-1(2H)-one (3ha)

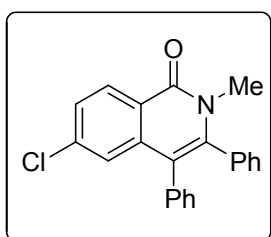



Yellow solid, m.p. 267-270 °C;  $^1\text{H NMR}$  (400 MHz,  $\text{CDCl}_3$ ):  $\delta$  8.46 (d,  $J = 8.4$  Hz 1 H), 7.41-7.38 (m, 1 H), 7.23-7.08 (m, 9 H), 7.03-7.01 (m, 2 H), 3.31 (s, 3 H);  $^{13}\text{C NMR}$  (100 MHz,  $\text{CDCl}_3$ ):  $\delta$  162.1 (C), 142.6 (C), 138.6 (C), 138.4 (C), 135.6 (C), 134.7 (C), 131.3 (2 CH), 129.6 (3 CH), 128.3 (CH), 128.2 (2 CH), 128.1 (2 CH), 127.0 (2 CH), 124.6 (CH), 123.2 (C), 117.9 (C), 34.3 ( $\text{CH}_3$ ); **HRMS** (ESI) cal. for  $\text{C}_{22}\text{H}_{16}\text{ClNO}$  345.0920, found 345.0918; IR (KBr): 2923, 2854, 1651, 1614, 1548, 1427, 1002, 875, 833, 782  $\text{cm}^{-1}$

### 2-Methyl-3,4-diphenyl-6-(trifluoromethyl)isoquinolin-1(2H)-one (3ia)

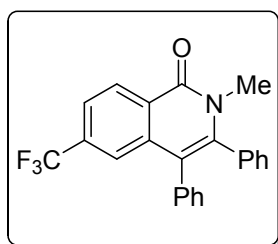

White solid, m.p. 175-178 °C;  $^1\text{H NMR}$  (400 MHz,  $\text{CDCl}_3$ ):  $\delta$  8.66 (d,  $J = 8.4$  Hz 1 H), 7.67-7.65 (m, 1 H), 7.42 (s, 1 H), 7.26-7.14 (m, 7 H), 7.12-7.09 (m, 2 H), 7.04-7.02 (m, 2 H), 3.35 (s, 3 H);  $^{13}\text{C NMR}$  (100 MHz,  $\text{CDCl}_3$ ):  $\delta$  161.9 (C), 142.9 (C), 137.2 (C), 135.4 (C), 134.5 (C), 133.6 (CH,  $J_{\text{C-F}} = 321$  Hz), 131.3 (2 CH), 129.7 (2 CH), 129.0 (CH), 128.5 (CH), 128.3 (3 CH), 128.2 (2 CH), 127.3 (CH), 126.9 (C), 125.1 (C), 122.5 (C,  $J_{\text{C-F}} = 222$  Hz), 123.2 (CH), 118.6 (C), 34.5 ( $\text{CH}_3$ ); **HRMS** (ESI) cal. for  $\text{C}_{23}\text{H}_{16}\text{F}_3\text{NO}$  379.1184, found 379.1183; IR (KBr): 2854, 1645, 1604, 1548, 1427, 1313, 1008, 785, 740  $\text{cm}^{-1}$

### 6-(Tert-butyl)-2-methyl-3,4-diphenylisoquinolin-1(2H)-one (3ja)

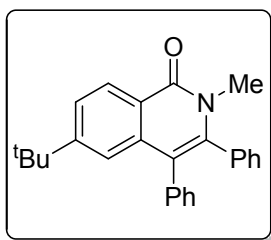

White solid, m.p. 135-138 °C;  $^1\text{H NMR}$  (400 MHz,  $\text{CDCl}_3$ ):  $\delta$  8.48 (d,  $J = 8.0$  Hz 1 H), 7.56 (dd,  $J = 8.0$  Hz 1 H), 7.22-7.08 (m, 12 H), 3.32 (s, 3 H), 1.20 (t, 9 H);  $^{13}\text{C NMR}$  (100 MHz,  $\text{CDCl}_3$ ):  $\delta$  162.5 (C), 155.3 (C), 141.0 (C), 136.9 (C), 136.4 (C), 135.1 (C), 131.4 (2 CH), 129.9 (2 CH), 128.0 (2 CH), 128.0 (CH), 127.7 (2 CH), 127.5 (CH), 126.6 (CH), 124.6 (CH), 122.6 (C), 121.2 (CH), 119.1 (C), 35.0 (C), 34.1 ( $\text{CH}_3$ ), 30.9 (3  $\text{CH}_3$ ); **HRMS** (ESI) cal. for  $\text{C}_{26}\text{H}_{25}\text{NO}$  367.1936, found 367.1934; IR (KBr): 2960.20, 1654.00, 1588.20, 1480.03, 1080.20, 925.40, 760.30, 698.30  $\text{cm}^{-1}$

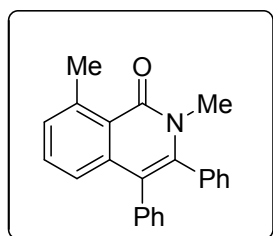

### 2,8-Dimethyl-3,4-diphenylisoquinolin-1(2H)-one (3ka)

Yellow solid, m.p. 220-224 °C;  $^1\text{H NMR}$  (400 MHz,  $\text{CDCl}_3$ ):  $\delta$  7.31-7.29 (m, 1 H), 7.23-7.18 (m, 9 H), 7.16-7.08 (m, 2 H), 7.04-6.95 (m, 1 H), 3.28 (s, 3 H), 3.02 (s, 3 H);  $^{13}\text{C NMR}$  (100 MHz,  $\text{CDCl}_3$ ):  $\delta$  163.4 (C), 141.5 (C), 141.1 (C), 138.8 (C), 137.1 (C), 135.2 (C), 131.5 (2 CH), 131.1 (CH), 129.7 (3 CH), 128.0 (2CH), 127.9 (2 CH), 127.8 (CH), 126.6 (CH), 123.6 (CH), 123.4 (CH), 118.7 (C), 34.2 ( $\text{CH}_3$ ), 24.3 ( $\text{CH}_3$ ); **HRMS** (ESI) cal. for  $\text{C}_{23}\text{H}_{19}\text{NO}$  325.1467, found 325.1467; IR (KBr): 2854, 1645, 1499, 1497, 1145, 948, 771, 730  $\text{cm}^{-1}$

### 8-Fluoro-2-methyl-3,4-diphenylisoquinolin-1(2H)-one (3la)

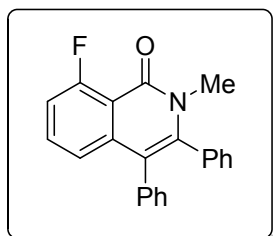

White solid, m.p. 228-230 °C;  $^1\text{H NMR}$  (400 MHz,  $\text{CDCl}_3$ ):  $\delta$  7.40-7.35 (m, 1 H), 7.23-7.00 (m, 11 H), 6.88 (d,  $J = 8.0$  Hz 1 H), 3.27 (s, 3 H);  $^{13}\text{C NMR}$  (100 MHz,  $\text{CDCl}_3$ ):  $\delta$  161.8 (C,  $J_{\text{C-F}} = 381$  Hz), 161.1 (C), 142.5 (C), 139.7 (C), 136.3 (C), 134.7 (C), 132.5 (CH,  $J_{\text{C-F}} = 10$  Hz), 131.4 (2 CH), 129.5 (2 CH), 128.2 (CH), 128.1 (2 CH), 127.9 (2 CH), 126.8 (CH), 121.2 (CH,  $J_{\text{C-F}} = 4$  Hz), 117.0 (C), 114.1 (C,  $J_{\text{C-F}} = 4$  Hz), 113.2 (CH,  $J_{\text{C-F}} = 21$  Hz), 34.0 ( $\text{CH}_3$ ); **HRMS** (ESI) cal. for  $\text{C}_{22}\text{H}_{16}\text{FNO}$  329.1216, found 329.1216; IR (KBr): 2923, 1651, 1611, 1483, 1417, 1134, 1048, 925, 781  $\text{cm}^{-1}$

### 8-Chloro-2-methyl-3,4-diphenylisoquinolin-1(2H)-one (3ma)

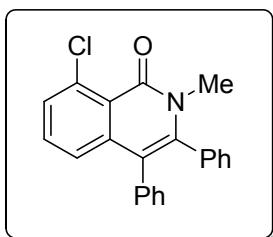

White solid, m.p. 220-222 °C;  $^1\text{H NMR}$  (400 MHz,  $\text{CDCl}_3$ ):  $\delta$  7.48-7.47 (m, 1 H), 7.46-7.29 (m, 1 H), 7.22-7.00 (m, 11 H), 3.29 (s, 3 H);  $^{13}\text{C NMR}$  (100 MHz,  $\text{CDCl}_3$ ):  $\delta$  160.8(C), 142.3 (C), 140.1 (C), 136.4 (C), 135.2 (C), 134.6 (C), 131.4 (2 CH), 131.3 (2 CH), 129.6 (2 CH), 129.4 (2 CH), 128.1 (CH), 128.1 (CH), 127.9 (CH), 126.8 (CH), 124.5 (CH), 121.2 (C), 117.9 (C), 34.46 ( $\text{CH}_3$ ); **HRMS** (ESI) cal. for  $\text{C}_{22}\text{H}_{16}\text{ClNO}$  345.0920, found 345.0919; IR (KBr): 2931, 1649, 1597, 1443, 1417, 1380, 1070, 935, 861, 784  $\text{cm}^{-1}$

### 7,8-Dimethoxy-2-methyl-3,4-diphenylisoquinolin-1(2H)-one (3na)

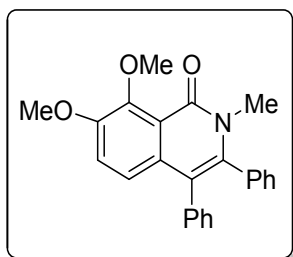

White solid, m.p. 221-223 °C; **<sup>1</sup>H NMR** (400 MHz, CDCl<sub>3</sub>): δ 7.20-7.09 (m, 7 H), 7.08-7.05 (m, 2 H), 7.01-6.99 (m, 2 H), 6.85-6.83 (d, *J* = 8.4 Hz 1 H), 4.02 (s, 3 H), 3.87 (s, 3 H), 3.26 (s, 3 H); **<sup>13</sup>C NMR** (100 MHz, CDCl<sub>3</sub>): δ 160.7 (C), 151.4 (C), 149.2 (C), 139.5 (C), 136.9 (C), 135.1 (C), 132.8 (C), 131.5 (2 CH), 129.9 (2 CH), 128.0 (2 CH), 127.9 (CH), 127.8 (2 CH), 126.6 (CH), 121.6 (CH), 119.8 (C), 118.1 (CH), 117.8 (C), 61.5 (OCH<sub>3</sub>), 56.6 (CH<sub>3</sub>), 34.2 (CH<sub>3</sub>), 55.1 (CH<sub>3</sub>); **HRMS** (ESI) cal. for C<sub>24</sub>H<sub>21</sub>NO<sub>3</sub> 371.1521, found 371.1520; IR (KBr): 2954, 1647, 1610, 1483, 1427, 1070, 1001, 771 cm<sup>-1</sup>

#### 6-Methyl-4,5-diphenylthieno[2,3-c]pyridin-7(6H)-one (3oa)

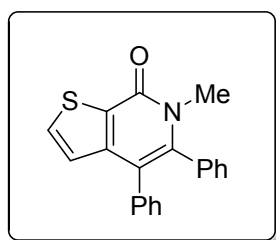

Yellow solid, m.p. 242-243 °C; **<sup>1</sup>H NMR** (400 MHz, CDCl<sub>3</sub>): δ 7.59 (d, *J* = 8.0 Hz 1 H), 7.26-7.23 (m, 3 H), 7.17-7.09 (m, 5 H), 7.05-7.03 (m, 2 H), 6.88 (d, *J* = 5.2 Hz 1 H), 3.37 (s, 3 H); **<sup>13</sup>C NMR** (100 MHz, CDCl<sub>3</sub>): δ 158.8 (C), 145.5 (C), 142.3 (C), 136.8 (C), 134.6 (C), 132.7 (CH), 130.6 (CH), 130.1 (CH), 128.8 (CH), 128.4 (CH), 128.3 (C), 127.8 (CH), 126.7 (CH), 124.7 (CH), 117.7 (C), 34.2 (CH<sub>3</sub>); **HRMS** (ESI) cal. for C<sub>20</sub>H<sub>15</sub>NOS 317.0874, found 317.0872; IR (KBr): 2923, 1640, 1577, 1490, 1440, 780, 698 cm<sup>-1</sup>

#### 5-Fluoro-2-methyl-3,4-diphenylisoquinolin-1(2H)-one (3pa)

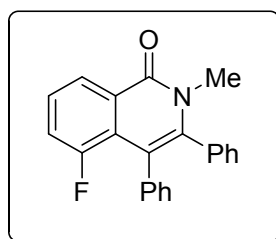

Yellow solid, m.p. 244-246 °C; **<sup>1</sup>H NMR** (400 MHz, CDCl<sub>3</sub>): δ 8.39 (d, *J* = 8.0 Hz 1 H), 7.45-7.39 (m, 1 H), 7.23-7.17 (m, 4 H), 7.11-7.02 (m, 7 H), 3.20 (s, 3 H); **<sup>13</sup>C NMR** (100 MHz, CDCl<sub>3</sub>): δ 161.6 (C), 158.1 (C, *J*<sub>C-F</sub> = 253 Hz), 142.6 (C), 138.3 (2 C), 134.6 (C), 130.6 (CH, *J*<sub>C-F</sub> = 3 Hz), 129.8 (2 CH), 128.2 (CH), 128.1 (2 CH), 127.1 (3 CH), 126.3 (CH), 125.9 (C, *J*<sub>C-F</sub> = 9 Hz), 124.0 (CH *J*<sub>C-F</sub> = 4 Hz), 119.0 (CH), 118.7 (CH), 114.6 (C), 34.5 (CH<sub>3</sub>); **HRMS** (ESI) cal. for C<sub>22</sub>H<sub>16</sub>FNO 329.1216, found 329.1215; IR (KBr): 2954, 1651, 1611, 1548, 1416, 1002, 833, 782 cm<sup>-1</sup>

### 2,7-Dimethyl-3,4-diphenylisoquinolin-1(2H)-one (3qa)

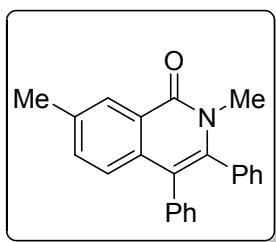

White solid, m.p. 232-234 °C;  $^1\text{H NMR}$  (400 MHz,  $\text{CDCl}_3$ ):  $\delta$  8.35 (s, 1 H), 7.34-7.32 (m, 1 H), 7.24-7.02 (m, 11 H), 3.33 (s, 3 H), 2.47 (s, 3 H);  $^{13}\text{C NMR}$  (100 MHz,  $\text{CDCl}_3$ ):  $\delta$  162.6 (C), 140.2 (C), 136.6 (2 C), 135.1 (C), 134.8 (C), 133.4 (CH), 131.4 (2 CH), 130.0 (CH), 128.1 (3 CH), 127.8 (2 CH), 127.3 (2 CH), 126.6 (CH), 125.3 (CH), 124.8 (C), 118.7 (C), 34.3 ( $\text{CH}_3$ ), 21.3 ( $\text{CH}_3$ ); **HRMS** (ESI) cal. for  $\text{C}_{23}\text{H}_{19}\text{NO}$  325.1467, found 325.1467; IR (KBr): 2923, 1645, 1499, 1340, 1142, 948, 770, 730  $\text{cm}^{-1}$

### 6,7-Dimethoxy-2-methyl-3,4-diphenylisoquinolin-1(2H)-one (3ra)

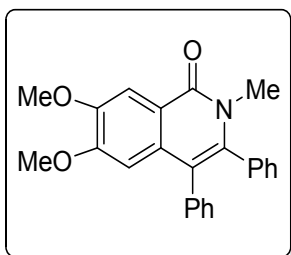

White solid, m.p. 240-242 °C;  $^1\text{H NMR}$  (400 MHz,  $\text{CDCl}_3$ ):  $\delta$  7.90 (s, 1 H), 7.18-7.00 (m, 10 H), 6.40 (s, 1 H), 4.00 (s, 3 H), 3.64 (s, 3 H), 3.32 (s, 3 H);  $^{13}\text{C NMR}$  (100 MHz,  $\text{CDCl}_3$ ):  $\delta$  161.9 (C), 153.0 (C), 149.0 (C), 139.8 (C), 136.6 (C), 135.1 (C), 132.5 (2 CH), 131.3 (2 CH), 130.0 (2 CH), 128.0 (2 CH), 128.0 (2 CH), 127.8 (CH), 126.7 (CH), 118.9 (CH), 118.4 (CH), 107.6 (C), 105.5 (C), 55.6 ( $\text{OCH}_3$ ), 55.1 ( $\text{OCH}_3$ ), 34.3 ( $\text{CH}_3$ ); **HRMS** (ESI) cal. for  $\text{C}_{24}\text{H}_{21}\text{NO}_3$  371.1521, found 371.1520; IR (KBr): 2954, 1645, 1604, 1483, 1415, 1230, 1143, 1072, 1001, 856, 781  $\text{cm}^{-1}$

### 7-Methyl-8,9-diphenyl-[1,3]dioxolo[4,5-f]isoquinolin-6(7H)-one (3sa)

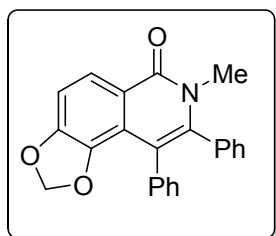

White solid, m.p. 248-250 °C;  $^1\text{H NMR}$  (400 MHz,  $\text{CDCl}_3$ ):  $\delta$  8.21 (d,  $J = 8.4$  Hz 1 H), 7.21-7.16 (M, 3 H), 7.07-7.00 (m, 8 H), 5.70 (s, 2 H), 3.26 (s, 3 H);  $^{13}\text{C NMR}$  (100 MHz,  $\text{CDCl}_3$ ):  $\delta$  162.0 (C), 150.5 (C), 142.0 (C), 141.8 (C), 137.4 (C), 134.8 (C), 131.2 (2 CH), 129.9 (2 CH), 128.0 (2 CH), 126.9 (2CH), 126.4 (CH), 123.6 (CH), 121.6 (C), 120.3 (C), 114.5 (C), 108.9 (CH), 101.4 ( $\text{CH}_2$ ), 34.1 ( $\text{CH}_3$ ); **HRMS** (ESI) cal. for  $\text{C}_{23}\text{H}_{17}\text{NO}_3$  355.1208, found 355.1206; IR (KBr): 2931, 1720, 1634, 1248, 1227, 1180, 925, 771, 705  $\text{cm}^{-1}$

### 2-Methyl-3,4-di-p-tolyloisoquinolin-1(2H)-one (3ab)

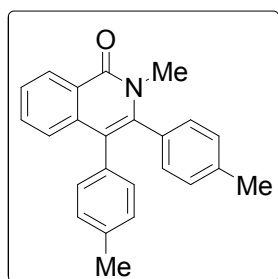

Yellow solid, m.p. 197-198 °C;  $^1\text{H NMR}$  (400 MHz,  $\text{CDCl}_3$ ):  $\delta$  8.53 (d,  $J = 7.2$  Hz 1 H), 7.80-7.43 (M, 2 H), 7.14 (d,  $J = 7.6$  Hz, 1 H), 7.03-6.91 (m, 8 H), 3.13 (s, 3 H), 2.26 (s, 3 H), 2.26 (s, 3 H);  $^{13}\text{C NMR}$  (100 MHz,  $\text{CDCl}_3$ ):  $\delta$  162.8 (C), 141.3 (C), 137.8 (C), 137.4 (C), 136.1 (C), 133.5 (C), 132.2 (2 CH), 131.8 (2 CH), 131.3 (2 CH), 129.7 (2CH), 128.8 (CH), 128.6 (CH), 127.7 (CH), 126.4 (CH), 125.3 (CH), 124.8 (C), 118.7 (C), 34.2 ( $\text{CH}_3$ ), 21.2 ( $\text{CH}_3$ ), 21.1 ( $\text{CH}_3$ ); **HRMS** (ESI) cal. for  $\text{C}_{24}\text{H}_{21}\text{NO}$  339.1623, found 339.1621; IR (KBr): 2854, 1640, 1592, 1480, 1411, 1080, 817, 773  $\text{cm}^{-1}$ .

### 3,4-Bis(4-methoxyphenyl)-2-methylisoquinolin-1(2H)-one (3ac)

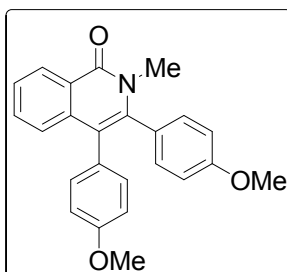

Yellow solid, m.p. 161-162 °C;  $^1\text{H NMR}$  (400 MHz,  $\text{CDCl}_3$ ):  $\delta$  8.52 (d,  $J = 7.6$  Hz 1 H), 7.51-7.42 (m, 2 H), 7.16 (d,  $J = 8.0$  Hz, 1 H), 7.01 (dd,  $J = 7.6$  Hz 2 H), 6.99 (dd,  $J = 7.6$  Hz 2 H), 6.75-6.71 (m, 4 H), 3.73 (s, 6 H), 3.32 (s, 3 H);  $^{13}\text{C NMR}$  (100 MHz,  $\text{CDCl}_3$ ):  $\delta$  162.7 (C), 159.0 (C), 158.1 (C), 141.2 (C), 137.5 (C), 132.4 (2 CH), 131.8 (CH), 131.0 (2 CH), 128.8 (C), 127.7 (CH), 127.5 (C), 126.3 (CH), 125.3 (CH), 124.8 (C), 118.7 (C), 113.5 (2 CH), 113.3 (2 CH), 55.0 ( $\text{OCH}_3$ ), 55.0 ( $\text{OCH}_3$ ), 34.2 ( $\text{CH}_3$ ); **HRMS** (ESI) cal. for  $\text{C}_{24}\text{H}_{21}\text{NO}_3$  371.1521, found 371.1518; IR (KBr): 2923, 1730, 1644, 1644, 1548, 1427, 1180, 925, 862, 731  $\text{cm}^{-1}$

### 2-Methyl-3,4-bis(4-(trifluoromethyl)phenyl)isoquinolin-1(2H)-one (3ad)

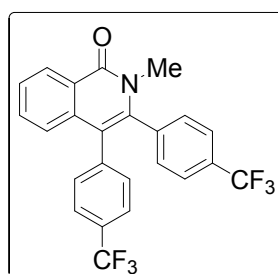

White solid, m.p. 198-200 °C;  $^1\text{H NMR}$  (400 MHz,  $\text{CDCl}_3$ ):  $\delta$  8.56-8.54 (m, 1 H), 7.57-7.46 (m, 8 H), 7.27-7.25 (m, 2 H), 7.19-7.17 (m, 2 H), 7.05-7.03 (m, 1 H), 3.31 (s, 3 H);  $^{13}\text{C NMR}$  (100 MHz,  $\text{CDCl}_3$ ):  $\delta$  162.4 (C), 139.9 (2 C), 138.1 (C), 136.3 (C), 132.4 (CH), 131.8 (2 CH), 130.8 (C,  $J_{\text{C-F}} = 32$  Hz), 130.3 (2 CH), 129.1 (C,  $J_{\text{C-F}} = 32$  Hz), 129.0 (C), 128.1 (CH), 127.3 (CH), 125.5 (CH), 125.2 (CH), 125.1 (CH), 125.0 (CH), 122.3 (C,  $J_{\text{C-F}} = 35$  Hz), 117.7 (C), 34.3 ( $\text{CH}_3$ ); **HRMS** (ESI) cal. for  $\text{C}_{24}\text{H}_{15}\text{F}_6\text{NO}$  447.1058, found 447.1057; IR (KBr): 2923, 2399, 1639, 1604, 1548, 1447, 1080, 817, 771, 728  $\text{cm}^{-1}$

### 3,4-Bis(4-bromophenyl)-2-methylisoquinolin-1(2H)-one (3ae)

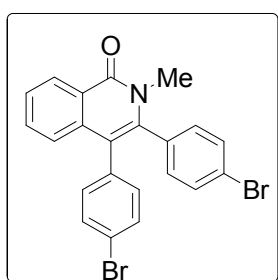

White solid, m.p. 202-204 °C;  $^1\text{H NMR}$  (400 MHz,  $\text{CDCl}_3$ ):  $\delta$  8.53 (d,  $J = 8.4$  Hz 1 H), 7.39(dd,  $J = 16.8$  Hz 2 H), 7.39-7.33 (m, 4 H), 7.09-7.06 (m, 1 H), 6.99 (dd,  $J = 8.4$  Hz 2 H), 6.92 (d,  $J = 8.4$  Hz 2 H), 3.30 (s, 3 H);  $^{13}\text{C NMR}$  (100 MHz,  $\text{CDCl}_3$ ):  $\delta$  162.5 (C), 140.1 (C), 136.6 (C), 135.1 (C), 133.6 (C), 133.0 (2 CH), 132.2 (CH), 131.7 (2 CH), 131.4 (4 CH), 127.9 (CH), 127.0 (CH), 125.0 (CH), 124.9 (C), 122.8 (C), 121.3 (C), 117.8 (2 C), 34.3 ( $\text{CH}_3$ ); **HRMS** (ESI) cal. for  $\text{C}_{22}\text{H}_{15}\text{Br}_2\text{NO}$  468.9520, found 468.9519; IR (KBr): 2954, 1640, 1604, 1548, 1427, 1159, 1054, 771, 730  $\text{cm}^{-1}$

### 3,4-Bis(4-fluorophenyl)-2-methylisoquinolin-1(2H)-one (3af)

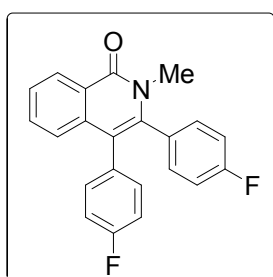

White solid, m.p. 173-175 °C;  $^1\text{H NMR}$  (400 MHz,  $\text{CDCl}_3$ ):  $\delta$  8.54 (d,  $J = 8.0$  Hz 1 H), 7.55-7.47 (m, 2 H), 7.11-7.06 (m, 3 H), 7.01-6.87 (m, 6 H), 3.30 (s, 3 H);  $^{13}\text{C NMR}$  (100 MHz,  $\text{CDCl}_3$ ):  $\delta$  162.6 (C), 162.2 (C,  $J_{\text{C-F}} = 248$  Hz), 161.6 (C,  $J_{\text{C-F}} = 246$  Hz), 140.4 (C), 136.9 (C), 133.0 (2 CH,  $J_{\text{C-F}} = 8$  Hz), 132.2 (C), 132.1 (CH), 131.7 (2 CH,  $J_{\text{C-F}} = 8$  Hz), 130.9 (C), 127.9 (CH), 126.8 (CH), 125.1 (CH), 124.4 (C), 118.1 (C), 115.6 (CH), 115.4 (CH), 115.2 (CH), 115.0 (CH), 34.2 ( $\text{CH}_3$ ); **HRMS** (ESI) cal. for  $\text{C}_{22}\text{H}_{15}\text{F}_2\text{NO}$  347.1122, found 347.1121; IR (KBr): 2928,

1640, 1604, 1508, 1482, 1080, 817, 771, 728 cm<sup>-1</sup>

### 2-Methyl-3,4-di(thiophen-2-yl)isoquinolin-1(2H)-one (3ag)

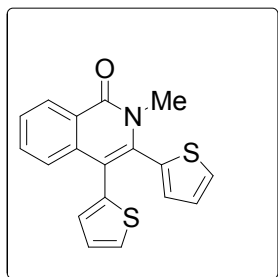

Brown solid, m.p. 228-230 °C; <sup>1</sup>H NMR (400 MHz, CDCl<sub>3</sub>): δ 8.51 (d, *J* = 7.6 Hz 1 H), 7.57-7.50 (m, 2 H), 7.36-7.31 (m, 2 H), 7.25-7.24 (m, 1 H), 6.94-6.91 (m, 3 H), 6.83-6.82 (m, 1 H), 3.31 (s, 3 H); <sup>13</sup>C NMR (100 MHz, CDCl<sub>3</sub>): δ 162.6 (C), 137.1 (C), 136.9 (C), 136.2 (C), 134.9 (C), 132.3 (CH), 130.1 (CH), 129.7 (CH), 127.7 (2 CH), 127.3 (CH), 126.6 (CH), 126.5 (2 CH), 125.4 (CH), 125.1 (C), 114.2 (C), 34.2 (CH<sub>3</sub>); HRMS (ESI) cal. for C<sub>18</sub>H<sub>13</sub>NOS<sub>2</sub> 323.0439, found 323.0441; IR (KBr): 2957, 1640, 1604, 1548, 1470, 780, 760, 700 cm<sup>-1</sup>

### 2-Methyl-3,4-dipropylisoquinolin-1(2H)-one (3ah)

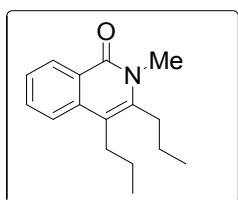

Yellow solid, m.p. 60-62 °C; <sup>1</sup>H NMR (400 MHz, CDCl<sub>3</sub>): δ 8.44 (d, *J* = 8.0 Hz 1 H), 7.60-7.59 (m, 2 H), 7.41-7.36 (m, 1 H), 3.60 (s, 3 H), 2.71-2.64 (m, 4 H), 1.64-1.53 (m, 4 H), 1.08-1.01 (m, 6 H); <sup>13</sup>C NMR (100 MHz, CDCl<sub>3</sub>): δ 162.9 (C), 139.8 (C), 136.4 (C), 131.8 (C), 128.2 (C), 125.5 (2 CH), 124.7 (CH), 122.5 (2 CH), 113.8 (4 CH), 31.7 (CH), 31.2 (CH), 29.76 (CH), 23.60 (C), 22.5 (C), 14.3 (C), 14.1 (CH<sub>3</sub>); HRMS (ESI) cal. for C<sub>16</sub>H<sub>21</sub>NO 243.1623, found 243.1622; IR (KBr): 2931, 1645, 1547, 1457, 1057, 898, 740 cm<sup>-1</sup>

### 4-Ethyl-2-methyl-3-phenylisoquinolin-1(2H)-one (3ai)

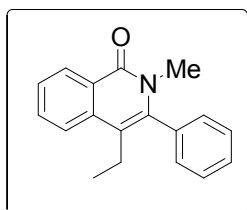

Yellow solid, m.p. 130-132 °C; <sup>1</sup>H NMR (400 MHz, CDCl<sub>3</sub>): δ 8.52-8.50 (m, 1 H), 7.84-7.65 (m, 2 H), 7.52-7.44 (m, 4 H), 7.28-7.24 (m, 2 H), 3.21 (s, 3 H), 2.40 (q, 2 H), 1.05 (t, 3 H); <sup>13</sup>C NMR (100 MHz, CDCl<sub>3</sub>): δ 162.5 (C), 140.1 (C), 136.0 (C), 135.6 (C), 132.1 (CH), 129.1 (CH), 129.0 (2 CH), 128.7 (CH), 128.4

(CH), 127.7 (CH), 126.3 (CH), 125.7 (C), 123.1 (CH), 116.7 (C), 34.11 (CH<sub>3</sub>), 22.6 (CH<sub>2</sub>), 14.8 (CH<sub>3</sub>); **HRMS** (ESI) cal. for C<sub>18</sub>H<sub>17</sub>NO 263.1310, found 263.1310; IR (KBr): 3010, 1641, 1485, 1409, 1186, 1007, 840, 787, 704 cm<sup>-1</sup>

#### 4-Butyl-3-(4-methoxyphenyl)-2-methylisoquinolin-1(2H)-one (3aj)

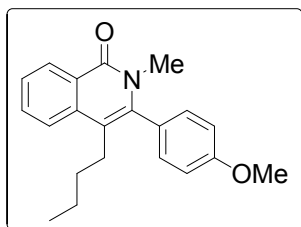

White semi-solid, **<sup>1</sup>H NMR** (400 MHz, CDCl<sub>3</sub>): δ 8.51-8.49 (m, 1 H), 7.67-7.61 (m, 2 H), 7.47-7.42 (m, 1 H), 7.16-7.14 (m, 2 H), 7.00-6.96 (m, 2 H), 3.84 (s, 3 H), 3.20 (s, 3 H), 2.39-2.35 (m, 2 H), 1.42-1.37 (m, 2 H), 1.20-1.16 (m, 2 H), 0.77-0.73 (m, 3 H); **<sup>13</sup>C NMR** (100 MHz, CDCl<sub>3</sub>): δ 162.4 (C), 159.6 (C), 140.0 (C), 136.2 (C), 131.8 (CH), 130.3 (2 CH), 128.1 (CH), 127.7 (C), 126.1 (CH), 123.1 (CH), 115.9 (C), 114.1 (2 CH), 113.9 (C), 55.22 (OCH<sub>3</sub>), 33.96 (CH<sub>3</sub>), 32.49 (CH<sub>3</sub>), 28.1 (CH<sub>2</sub>), 22.7 (CH<sub>2</sub>), 13.7 (CH<sub>2</sub>); **HRMS** (ESI) cal. for C<sub>21</sub>H<sub>23</sub>NO<sub>2</sub> 321.1729, found 321.1729; IR (KBr): 2957, 1642, 1611, 1518, 1411, 1180, 840, 771, 700 cm<sup>-1</sup>

#### Ethyl 2-methyl-1-oxo-3-phenyl-1,2-dihydroisoquinoline-4-carboxylate (3ak)

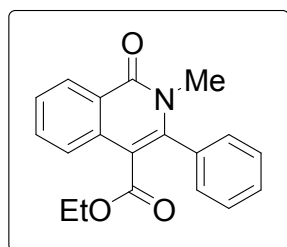

White solid, m.p. 167-170 °C; **<sup>1</sup>H NMR** (400 MHz, CDCl<sub>3</sub>): δ 8.49 (d, *J* = 7.6 Hz 1 H), 7.67-7.65 (m, 2 H), 7.53-7.49 (m, 1 H), 7.47-7.44 (m, 3 H), 7.36-7.33 (m, 2 H), 3.94 (q, 2 H), 3.30 (s, 3 H), 0.84 (t, 3 H); **<sup>13</sup>C NMR** (100 MHz, CDCl<sub>3</sub>): δ 166.9 (C), 162.5 (C), 143.5 (C), 134.4 (C), 133.3 (C), 132.7 (CH), 129.3 (CH), 129.0 (2 CH), 128.6 (2 CH), 128.0 (CH), 127.2 (CH), 124.5 (C), 123.9 (CH), 112.5 (C), 61.0 (CH<sub>2</sub>), 34.0 (CH<sub>3</sub>), 13.4 (CH<sub>3</sub>); **HRMS** (ESI) cal. for C<sub>19</sub>H<sub>17</sub>NO<sub>3</sub> 307.1208, found 307.1208; IR (KBr): 2923, 1730, 1644, 1284, 1247, 1193, 761, 705 cm<sup>-1</sup>

#### 3-((Dimethylamino)methyl)-6-methoxy-2-methyl-4-phenylisoquinolin-1(2H)-one (3fj)

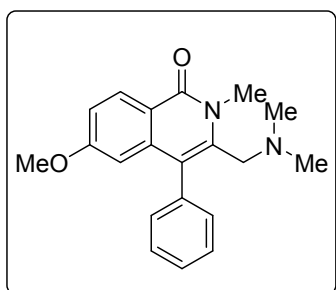



White solid, m.p. 167-170 °C;  $^1\text{H NMR}$  (400 MHz,  $\text{CDCl}_3$ ):  $\delta$  8.40 (d,  $J = 8.8$  Hz 1 H), 7.46-7.40 (m, 3 H), 7.19-7.02 (m, 2 H), 7.01 (d,  $J = 8.0$  Hz, 1 H), 6.28 (s, 1 H), 3.81 (s, 3 H), 3.64 (s, 3 H), 3.24 (s, 2 H), 1.23 (s, 6 H);  $^{13}\text{C NMR}$  (100 MHz,  $\text{CDCl}_3$ ):  $\delta$  162.8 (C), 162.2 (C), 139.0 (C), 137.2 (C), 136.9 (C), 131.6 (2 CH), 129.9 (CH), 128.5 (2 CH), 127.6 (CH), 119.7 (C), 118.9 (C), 115.1 (CH), 107.3 (CH), 57.8 ( $\text{OCH}_3$ ), 55.1 ( $\text{CH}_2$ ), 44.6 (2  $\text{CH}_3$ ), 31.1 ( $\text{CH}_3$ ); **HRMS** (ESI) cal. for  $\text{C}_{20}\text{H}_{22}\text{N}_2\text{O}_2$  322.1681, found 322.1682; IR (KBr): 2954, 1730.00, 1644.60, 1284.02, 1247.03, 1193.10, 761.80, 705.00  $\text{cm}^{-1}$

**5,6,13-Triphenyl-8H-isoquinolino[3,2-a]isoquinolin-8-one (3ta)**

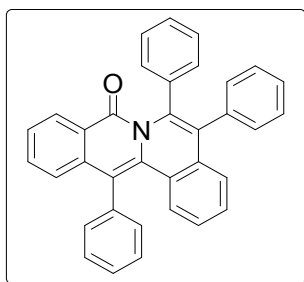

Yellow solid, m.p. 165-167 °C;  $^1\text{H NMR}$  (400 MHz,  $\text{CDCl}_3$ ):  $\delta$  8.24 (d,  $J = 8.0$  Hz 1 H), 7.61-7.47 (m, 6 H), 7.42 (t,  $J = 16.0$  Hz, 1 H), 7.33 (dd,  $J = 8.0$  Hz 1 H), 7.27-7.06 (m, 13 H), 6.86 (t,  $J = 16.0$  Hz, 1 H);  $^{13}\text{C NMR}$  (100 MHz,  $\text{CDCl}_3$ ):  $\delta$  162.2 (C), 138.6 (C), 137.1 (2 C), 136.3 (C), 136.2 (C), 133.8 (C), 133.1 (C), 132.3 (CH), 132.2 (2 CH), 131.5 (2 CH), 129.7 (2 CH), 129.0 (CH), 128.9 (2 CH), 128.5 (CH), 128.1 (CH), 127.9 (2 CH), 127.6 (C), 127.4 (CH), 127.1 (2 CH), 126.9 (CH), 126.8 (CH), 126.7 (C), 126.4 (CH), 126.3 (CH), 125.8 (C), 125.6 (CH), 125.5 (CH), 116.9 (C); **HRMS** (ESI) cal. for  $\text{C}_{35}\text{H}_{23}\text{NO}$  473.1780, found 473.1778; IR (KBr): 2923, 1644, 1538, 1180, 925, 862, 701  $\text{cm}^{-1}$

References

1. D. D. Perrin, W. L. F. Armarego, In Purification of Laboratory Chemicals, 3rd ed.; Pergamon Press: New York, 1988.
2. B. Li and P. H. Dixneuf, *Chem. Soc. Rev.*, 2013
- 3 J. Wencel-Delord, T. Droge, F. Liu and F. Glorius, *Chem. Soc. Rev.*, 2011, **40**, 4740
4. L. Ackermann, A. V. Lygin and N. Hofmann, *Angew. Chem., Int. Ed.*, 2011, **50**, 6379

5. C.-C. Liu, K. Parthasarathy and C.-H. Cheng, *Org. Lett.*, 2010, **12**, 3518

6- T. K. Hyster and T. Rovis, *J. Am. Chem. Soc.*, 2010, **132**, 10565

$^1\text{H}$  and  $^{13}\text{C}$  NMR spectra of compound **3aa**.

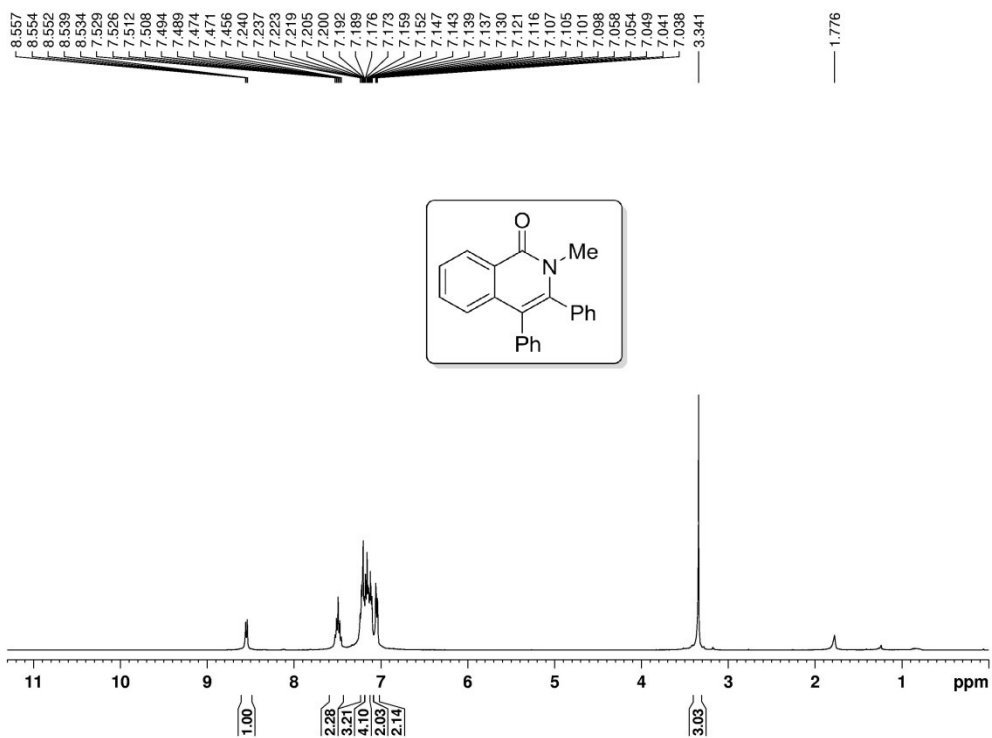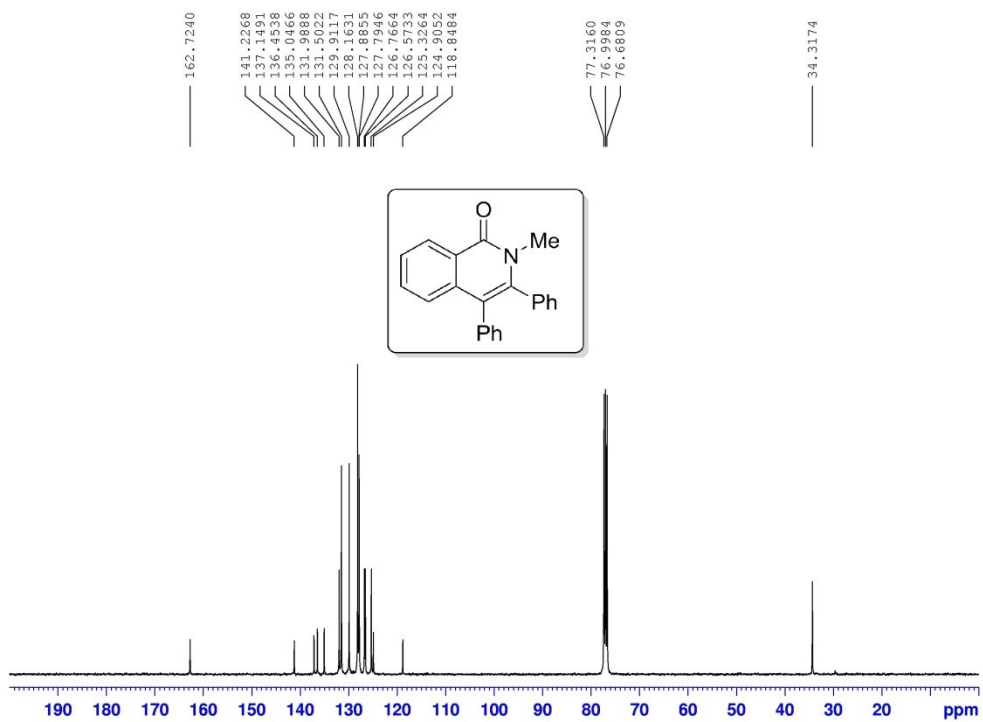

$^1\text{H}$  and  $^{13}\text{C}$  NMR spectra of compound **3ba**

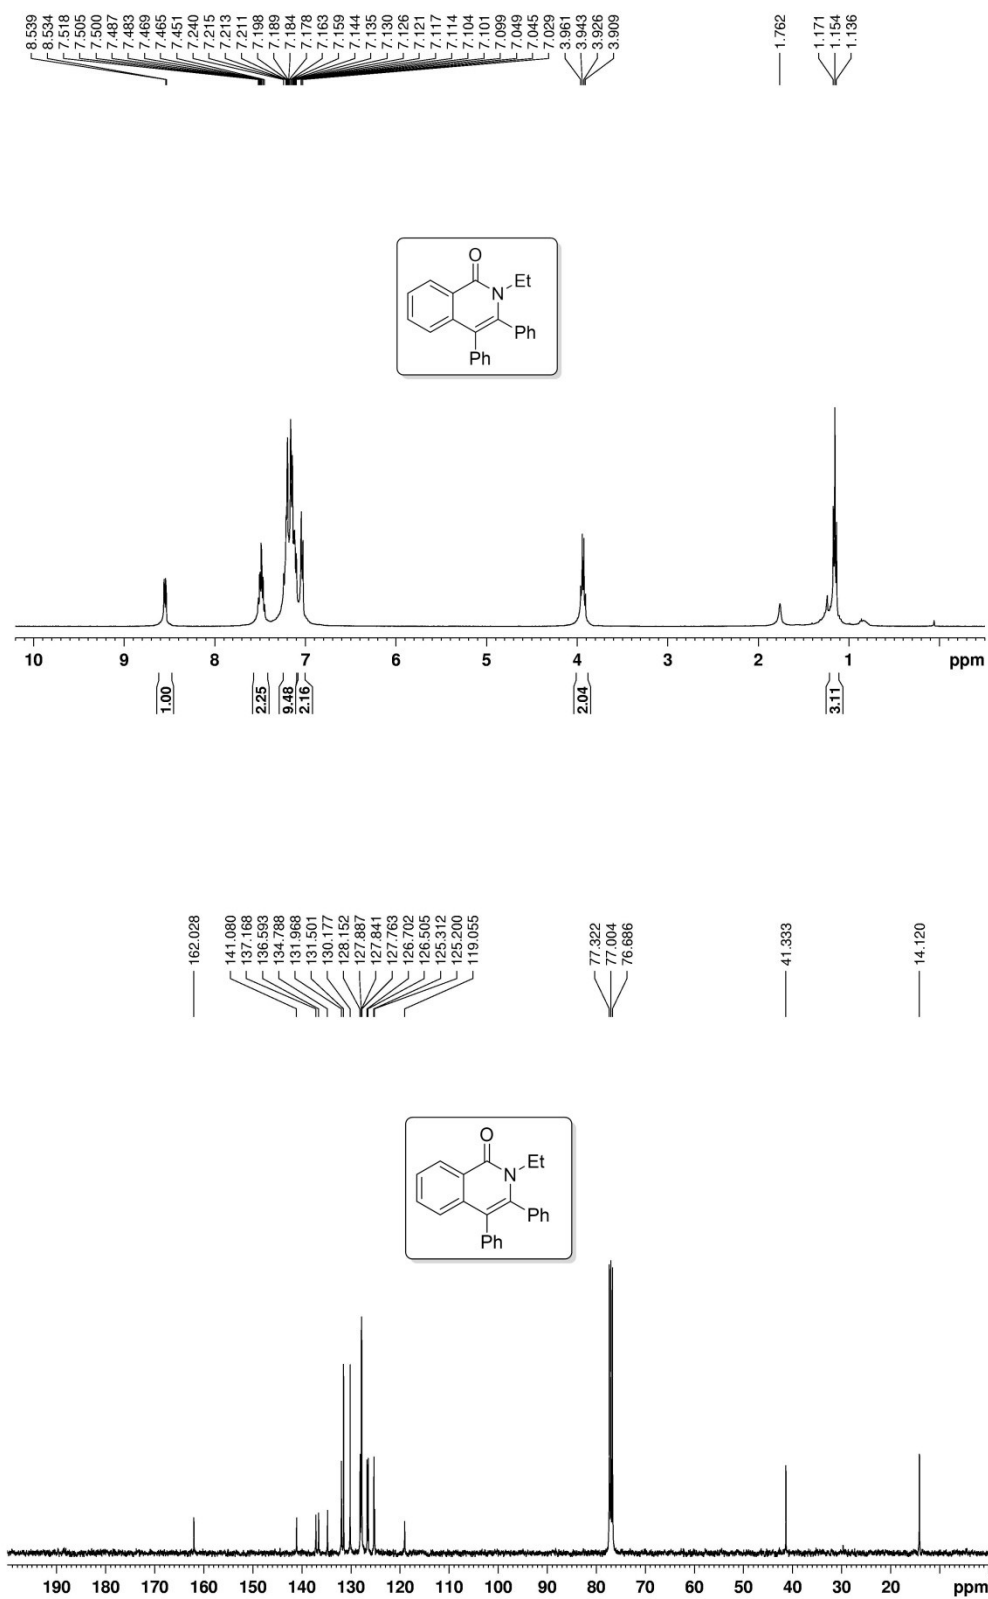

$^1\text{H}$  and  $^{13}\text{C}$  NMR spectra of compound **3ca**.

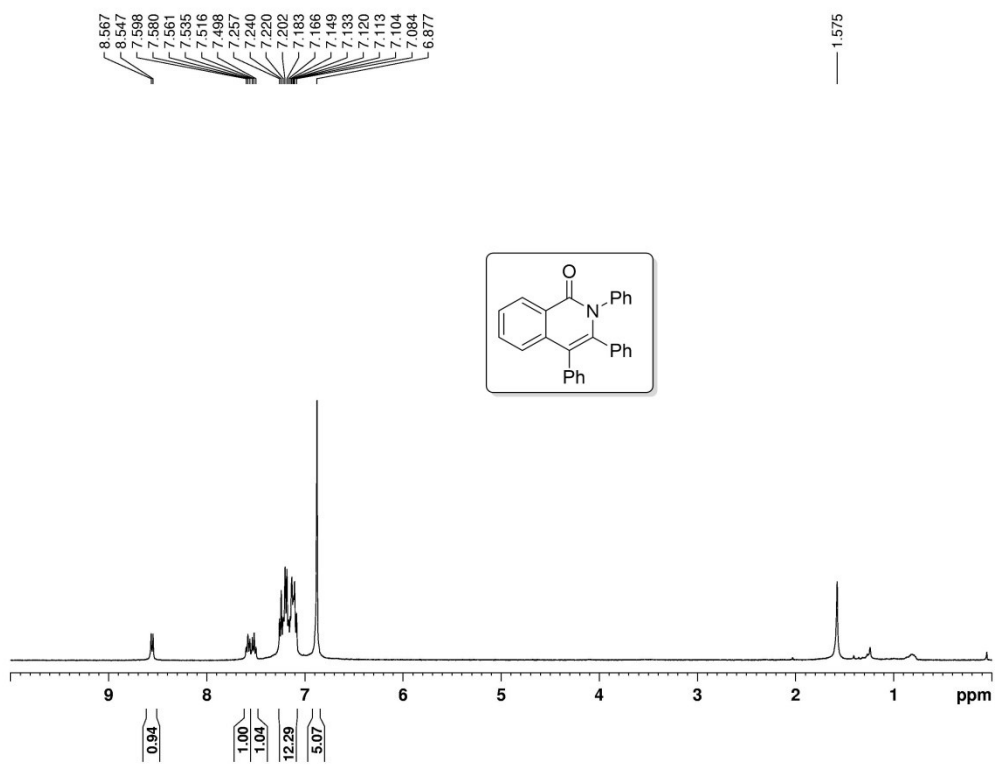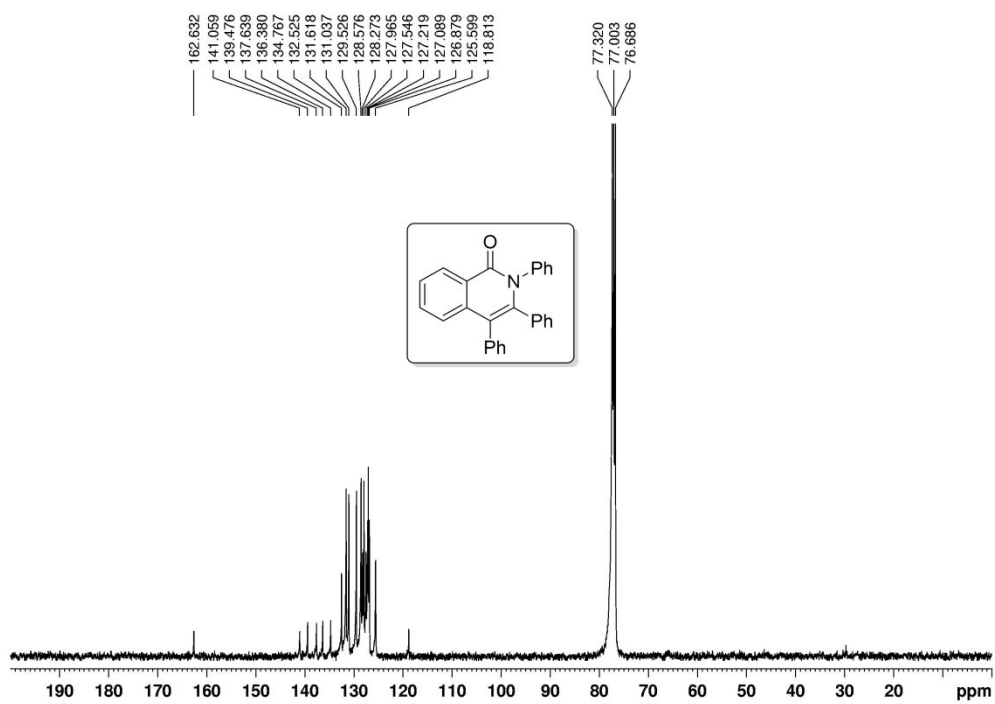

$^1\text{H}$  and  $^{13}\text{C}$  NMR spectra of compound **3da**.

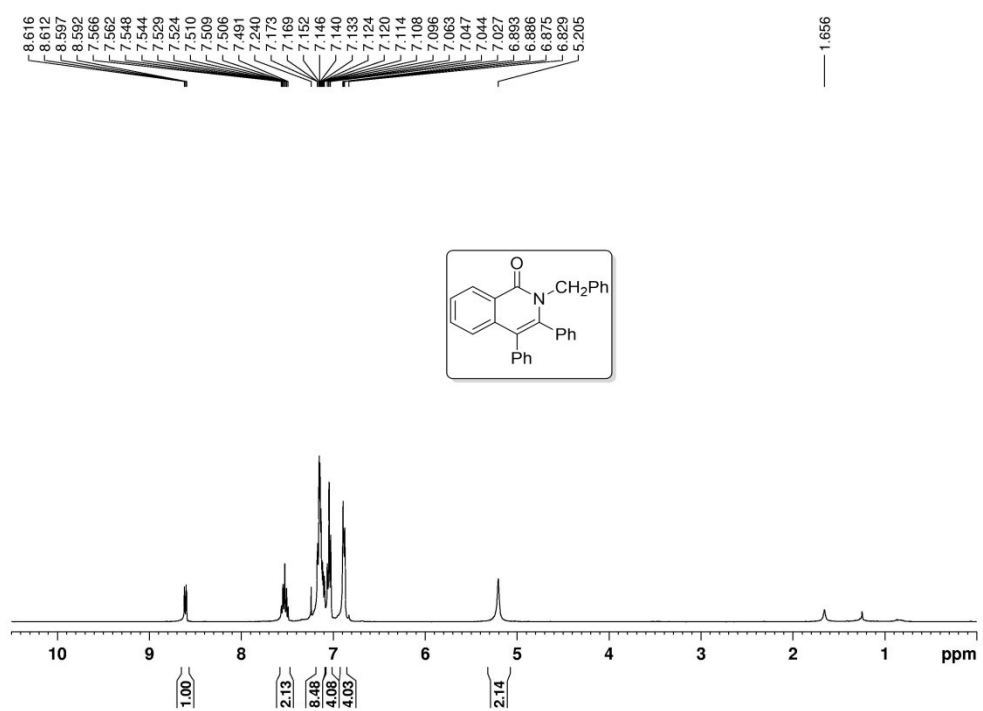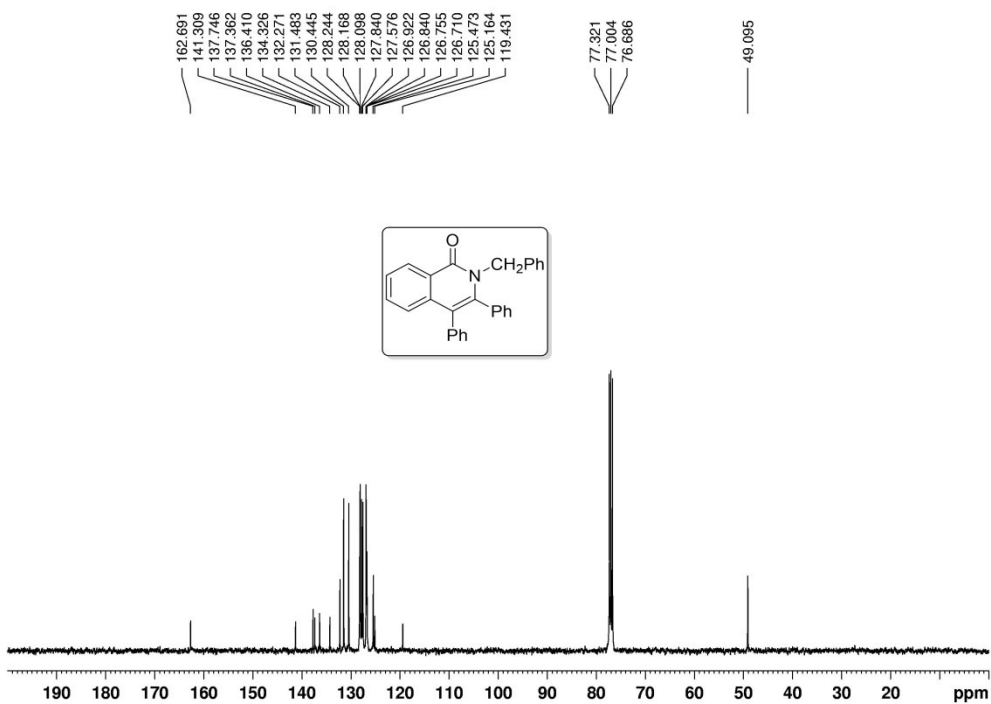

<sup>1</sup>H and <sup>13</sup>C NMR spectra of compound 3ea.

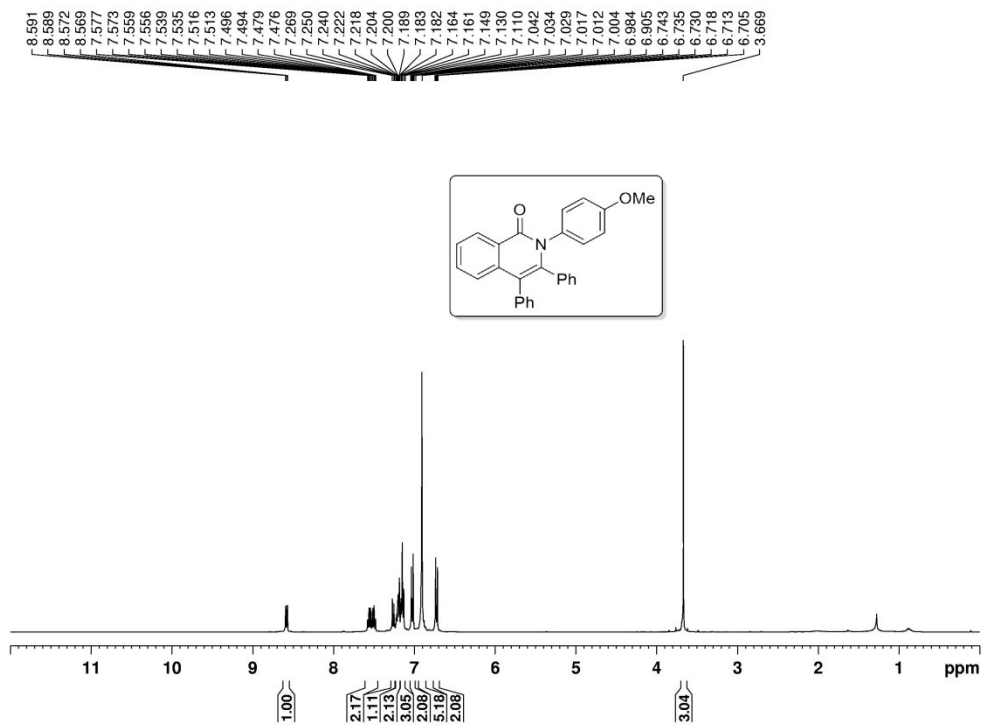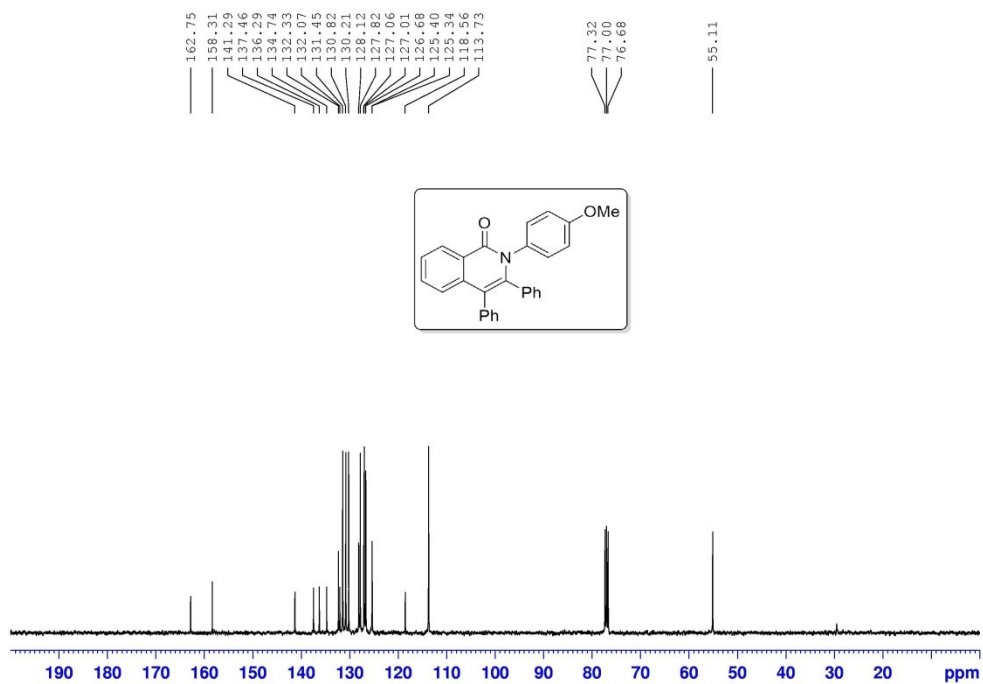

<sup>1</sup>H and <sup>13</sup>C NMR spectra of compound **3fa**.

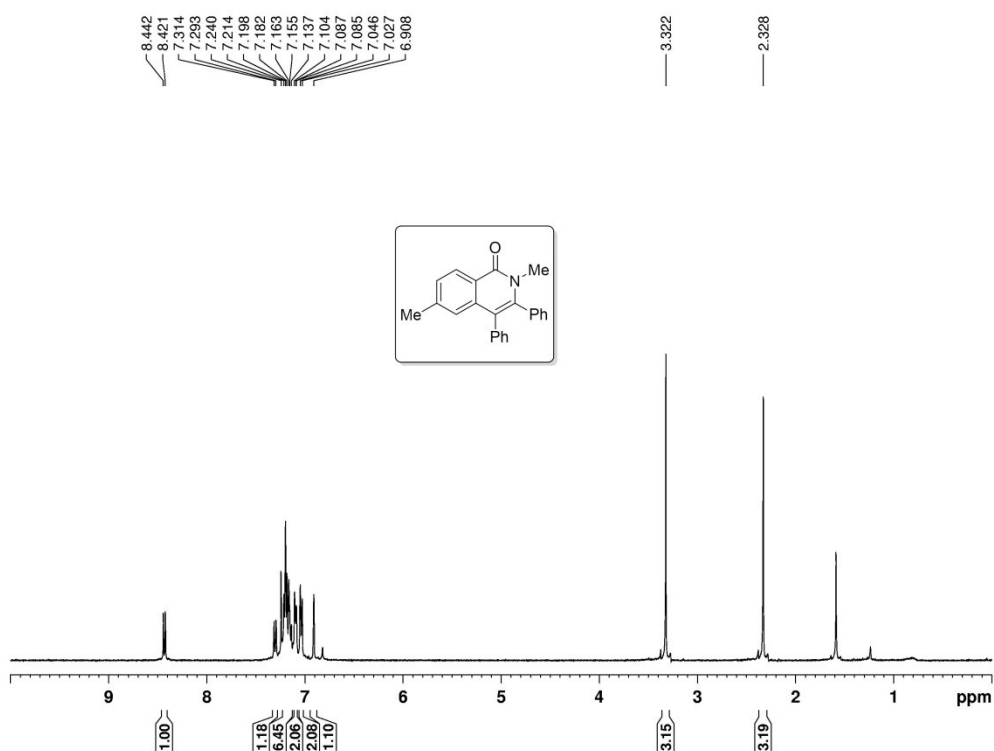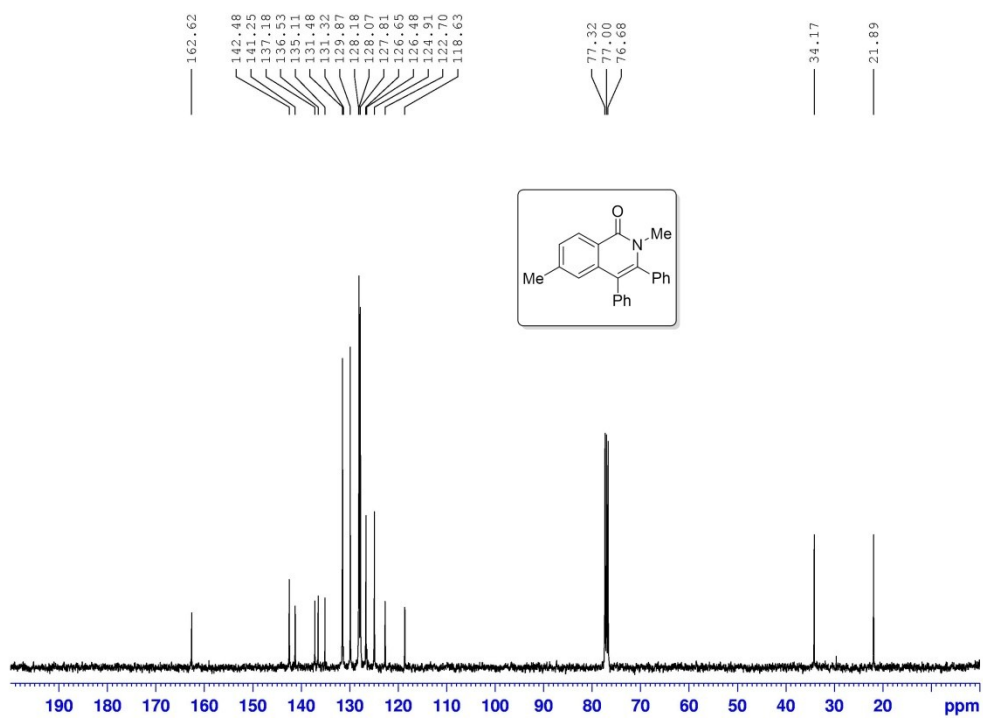

<sup>1</sup>H and <sup>13</sup>C NMR spectra of compound **3ga**.



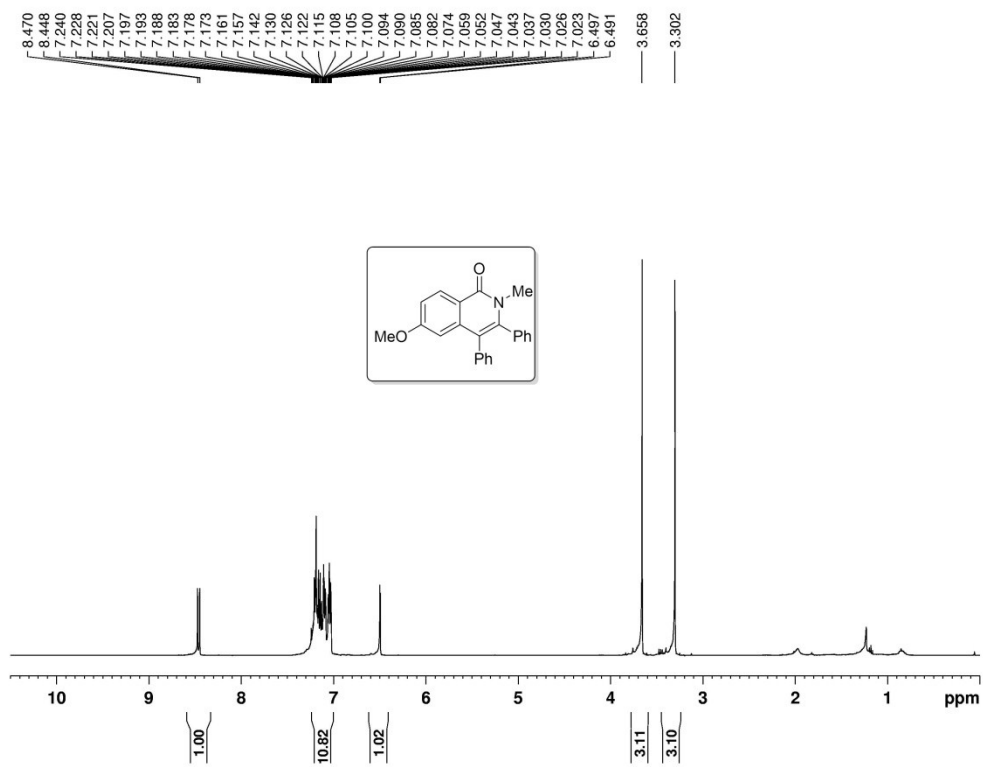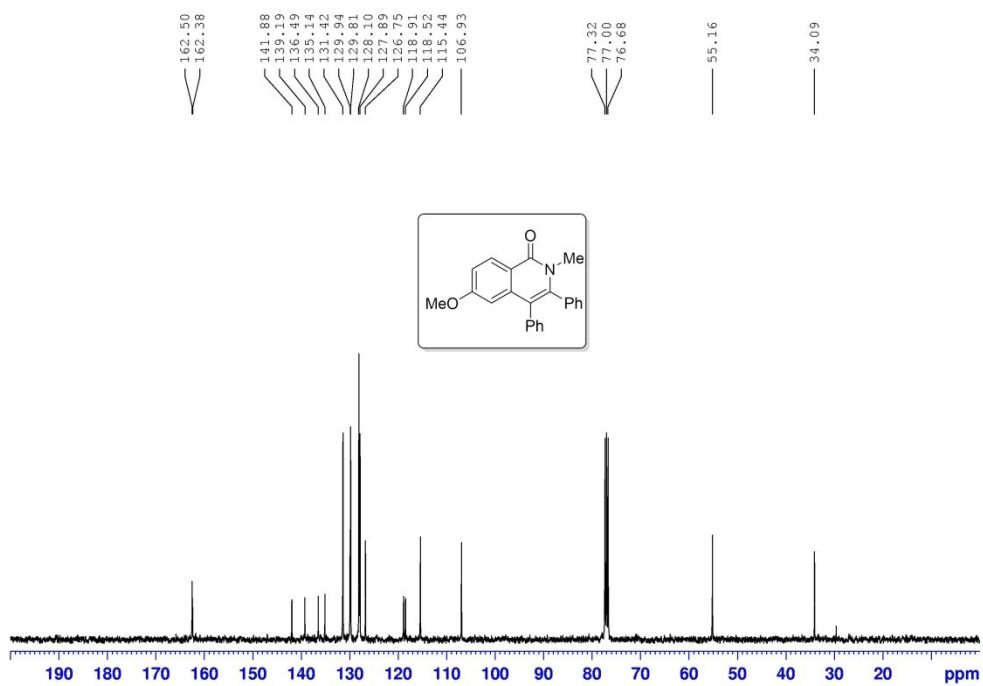

<sup>1</sup>H and <sup>13</sup>C NMR spectra of compound **3ha**.

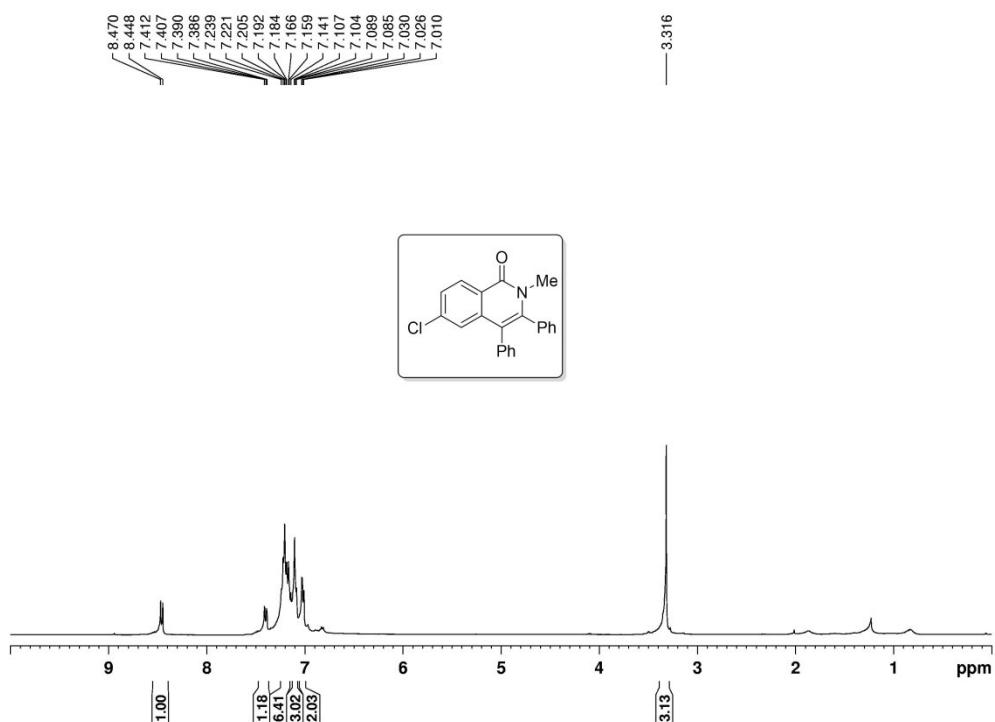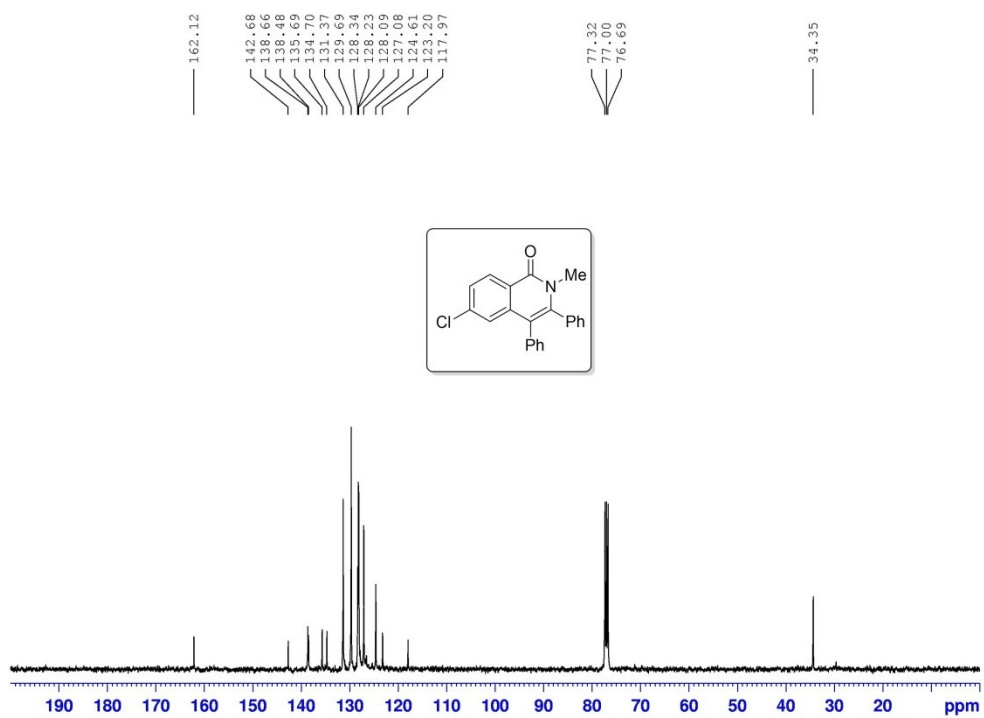

<sup>1</sup>H and <sup>13</sup>C NMR spectra of compound **3ia**.

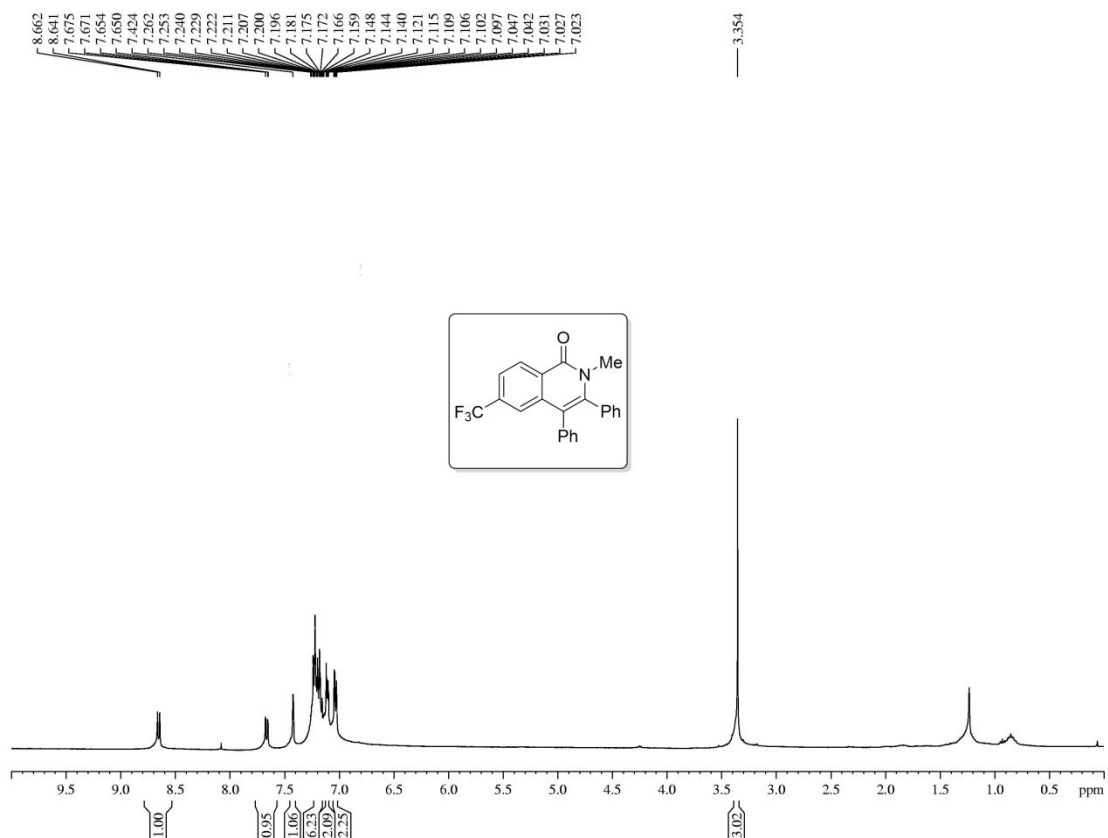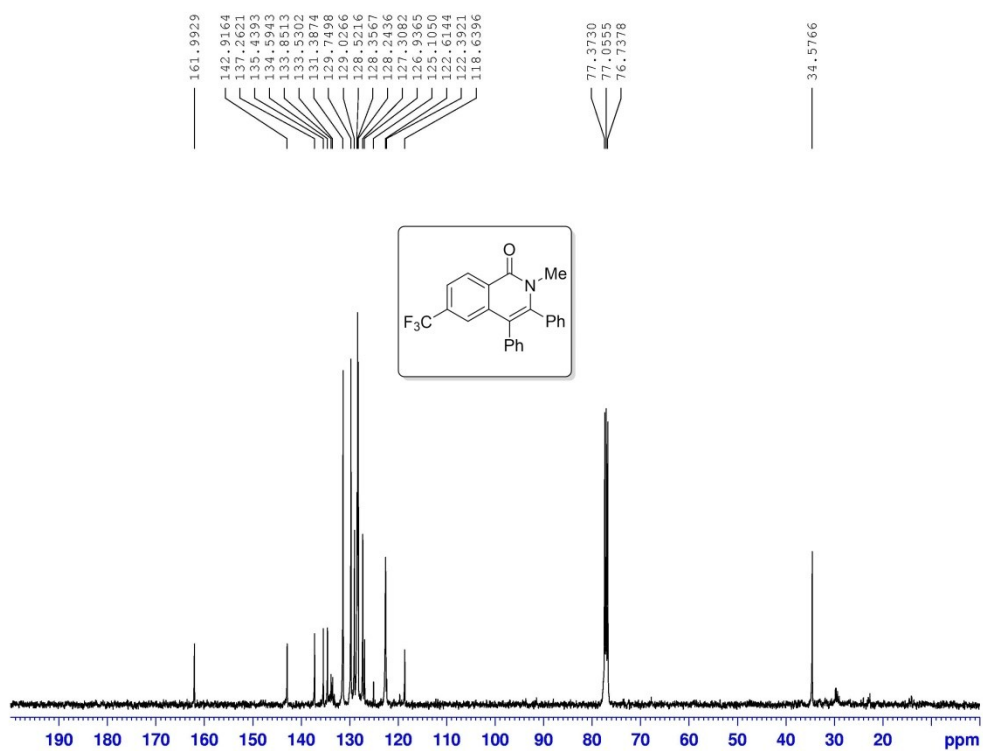

<sup>1</sup>H and <sup>13</sup>C NMR spectra of compound **3ja**

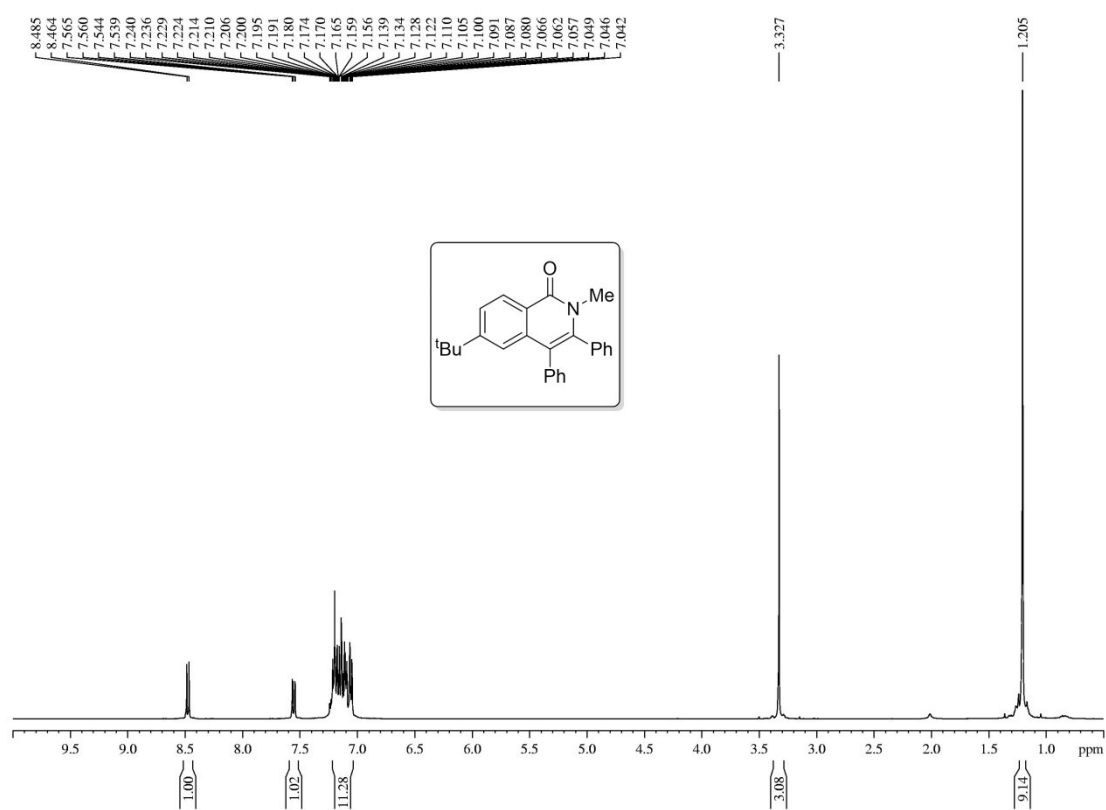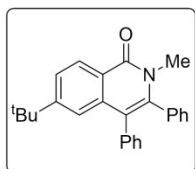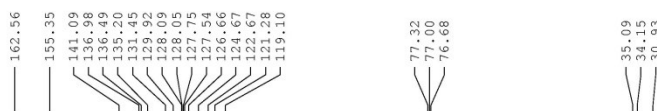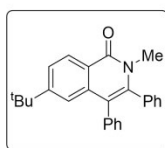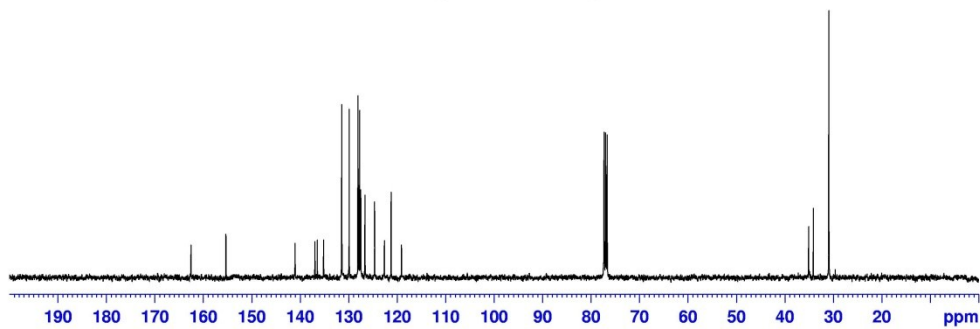

$^1\text{H}$  and  $^{13}\text{C}$  NMR spectra of compound **3ka**.

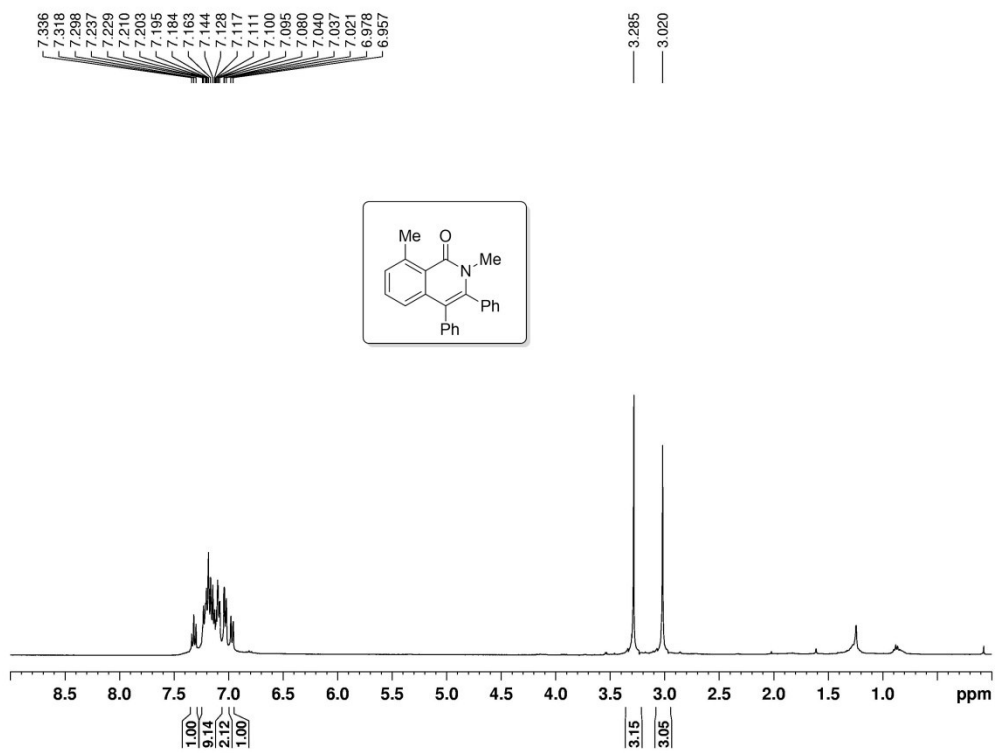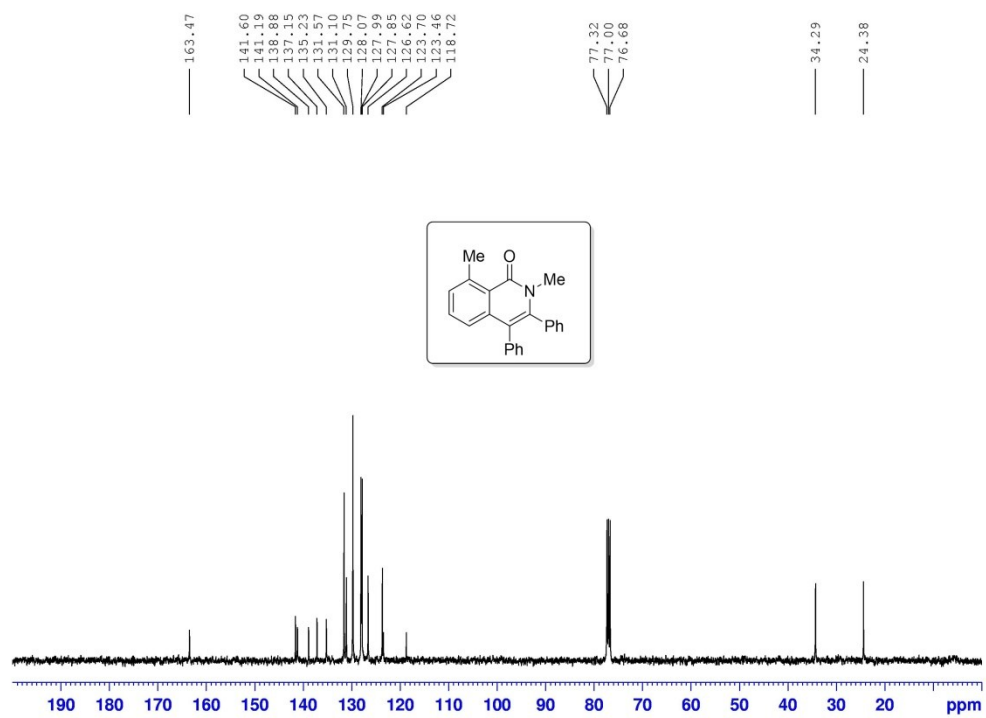

<sup>1</sup>H and <sup>13</sup>C NMR spectra of compound 31a

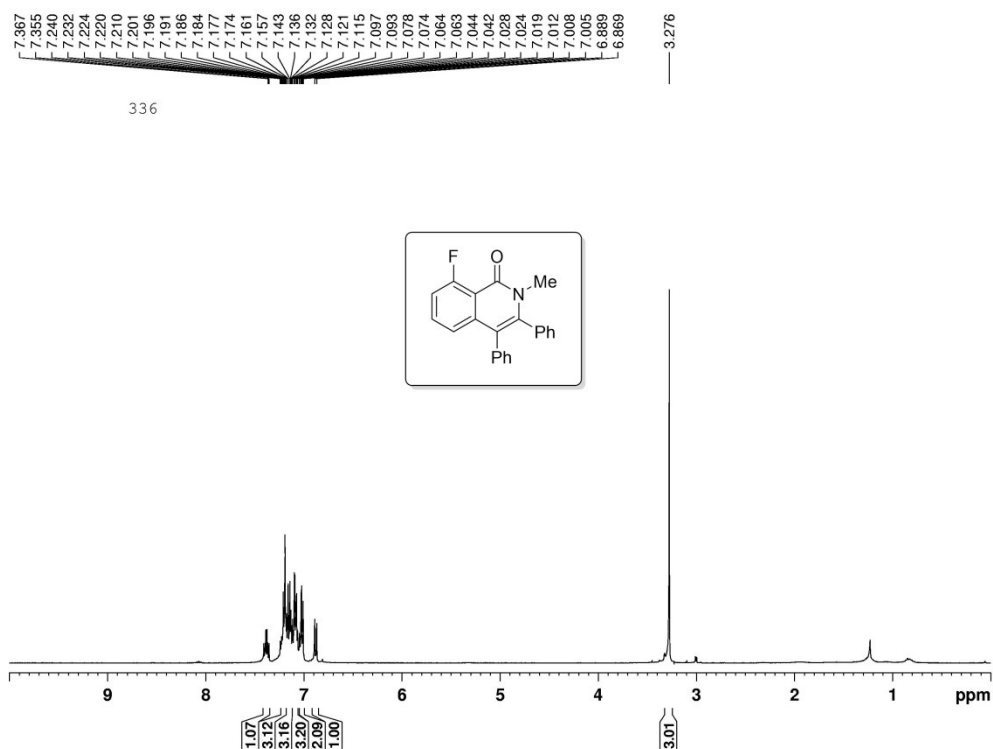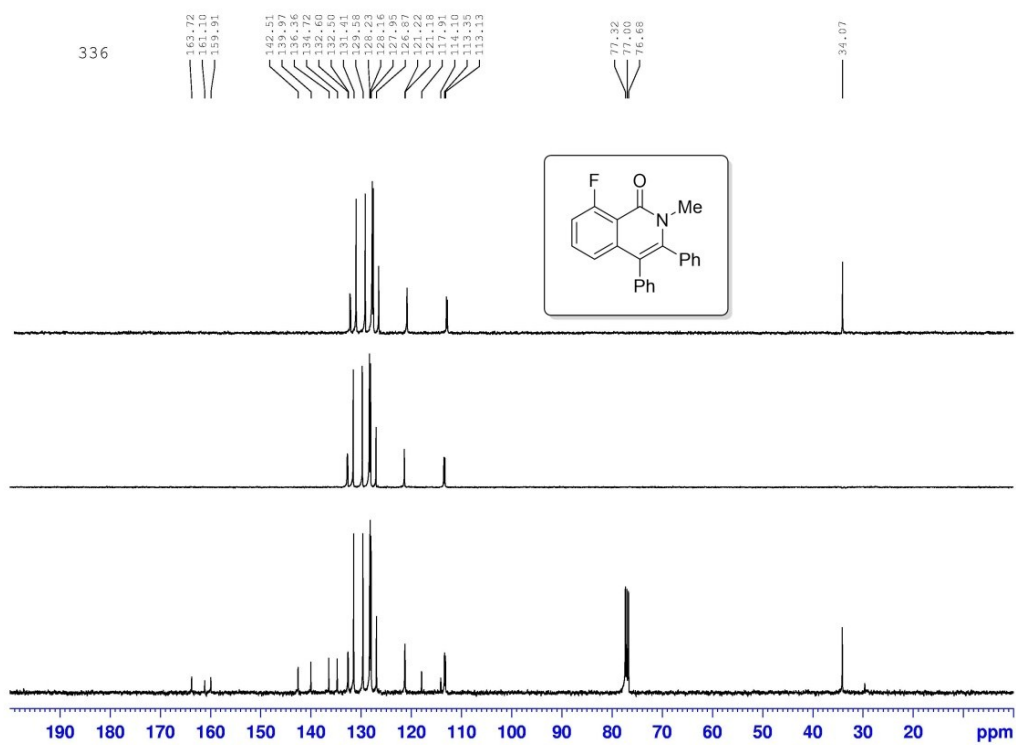

$^1\text{H}$  and  $^{13}\text{C}$  NMR spectra of compound **3ma**.

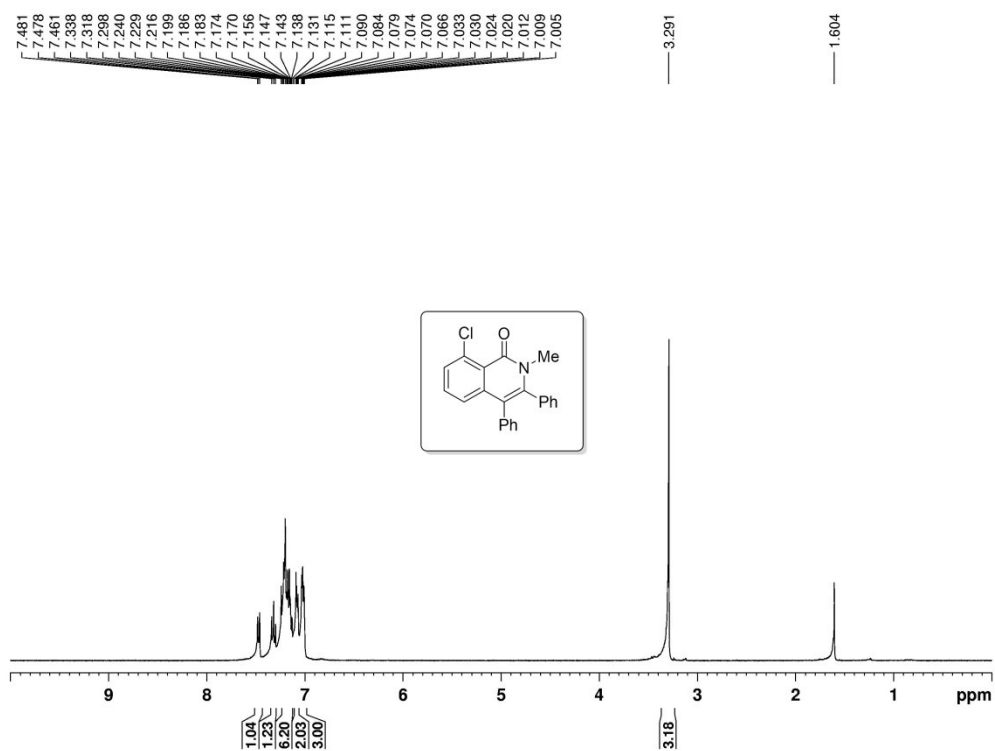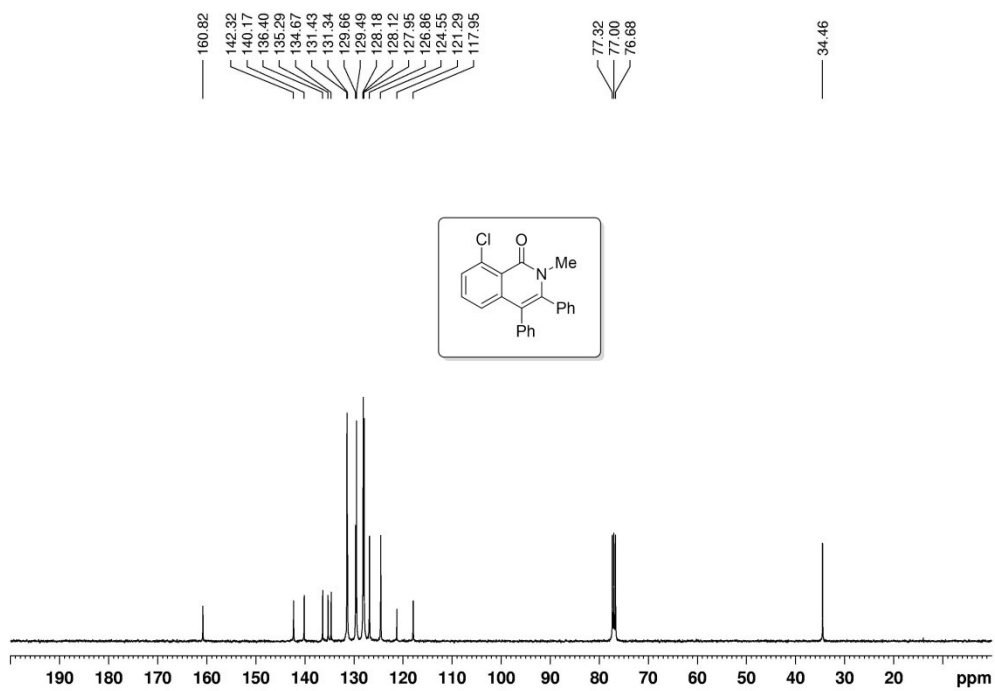

<sup>1</sup>H and <sup>13</sup>C NMR spectra of compound **3na**

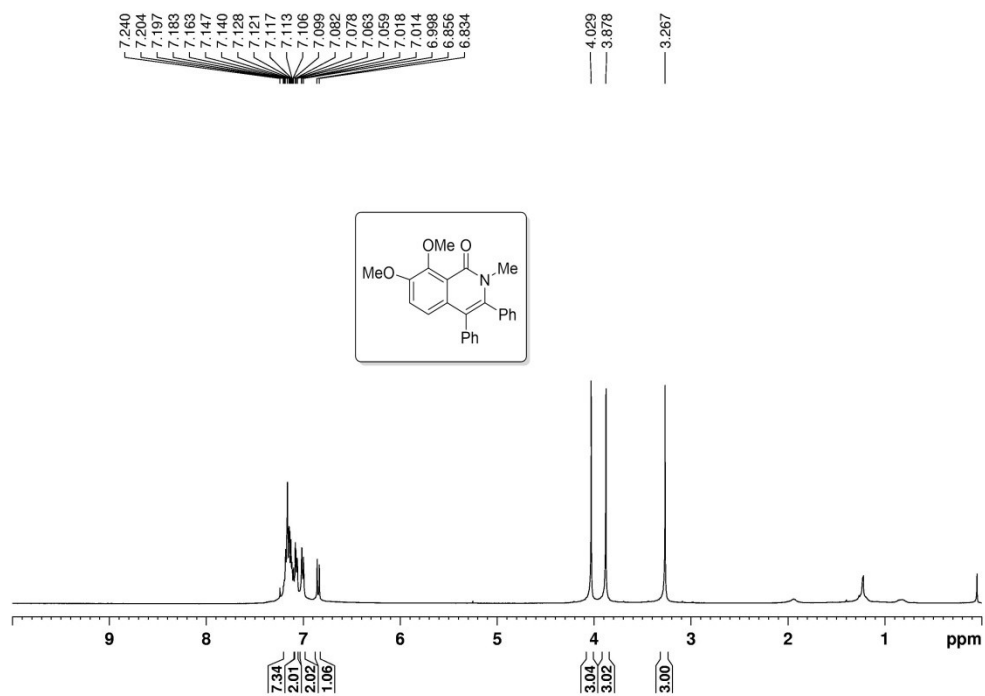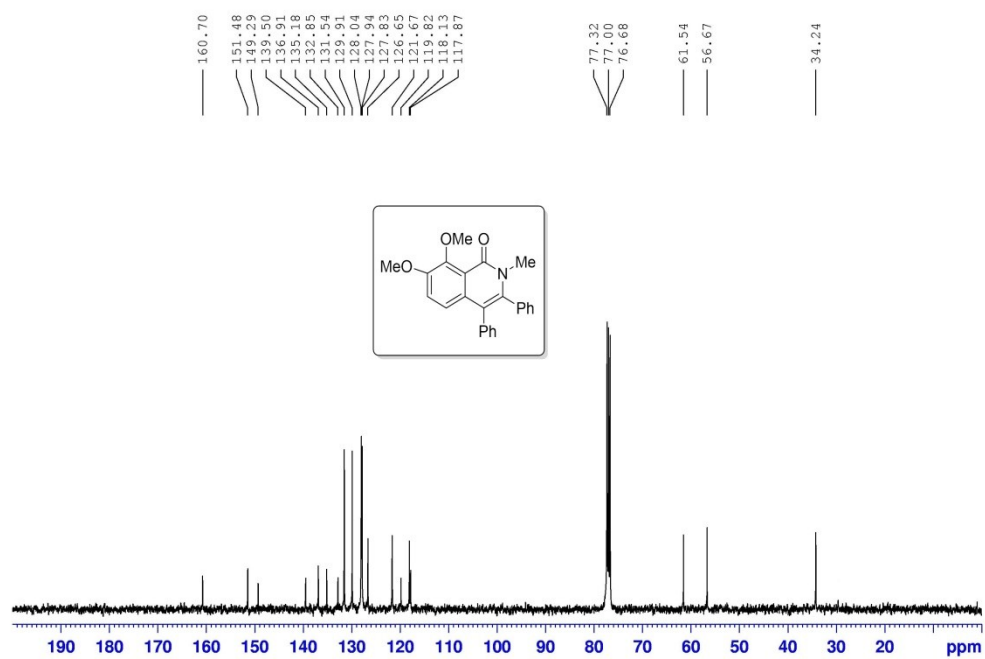

<sup>1</sup>H and <sup>13</sup>C NMR spectra of compound 30a



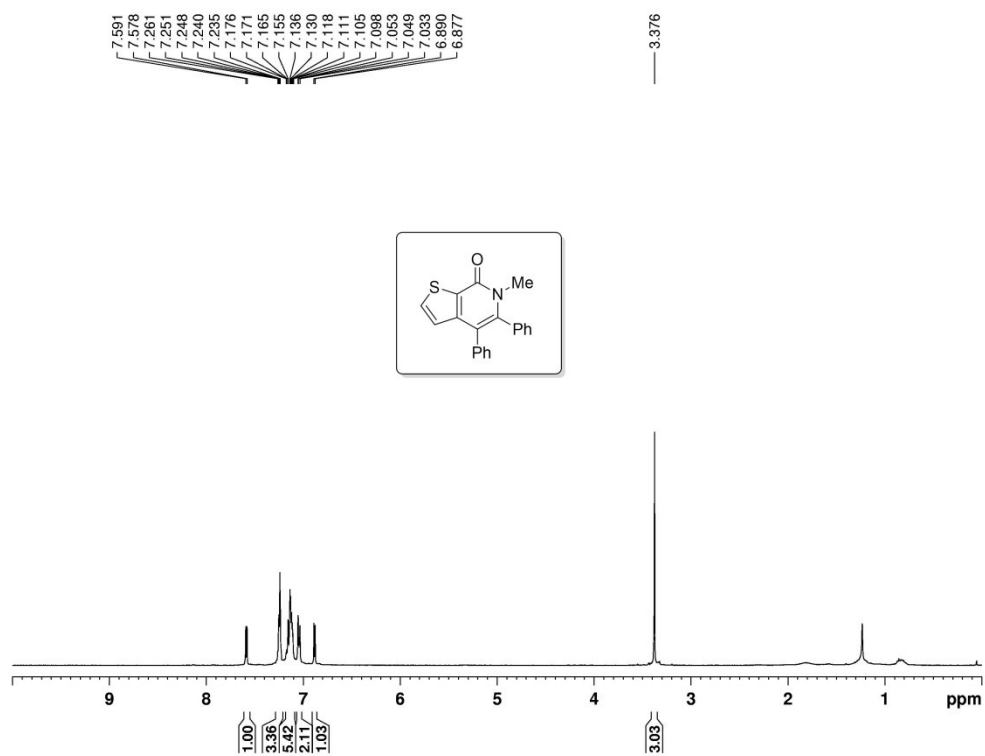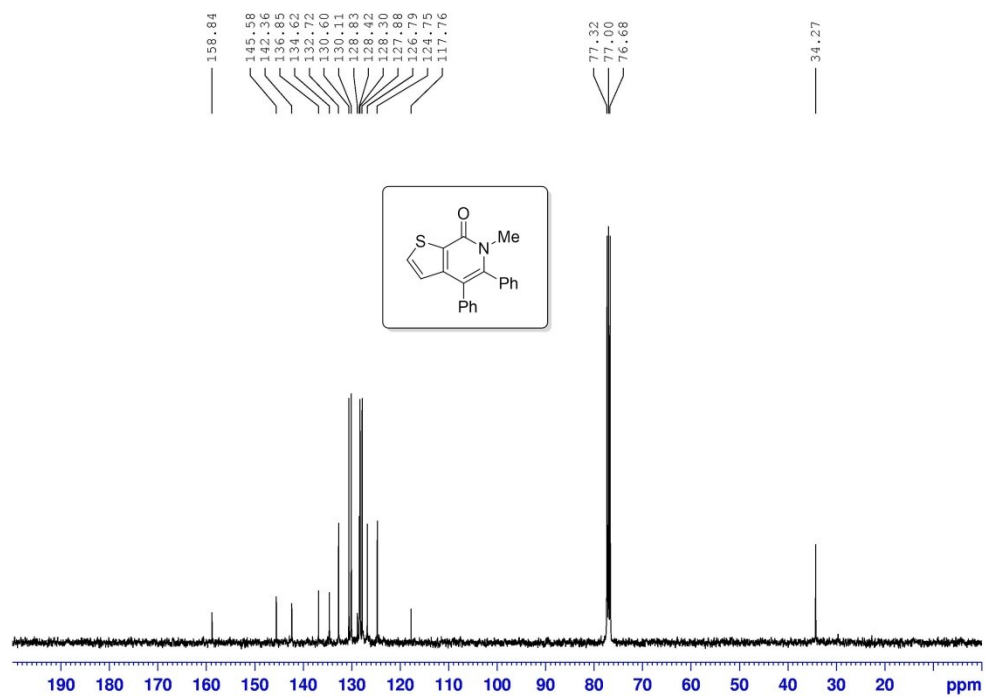

<sup>1</sup>H and <sup>13</sup>C NMR spectra of compound **3pa**.

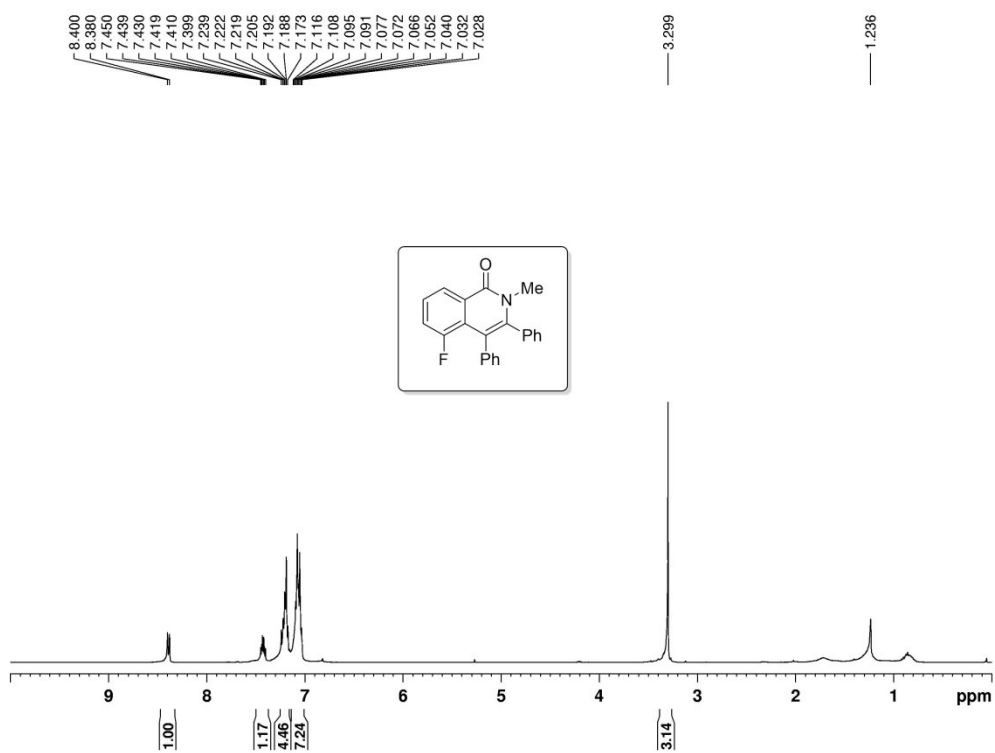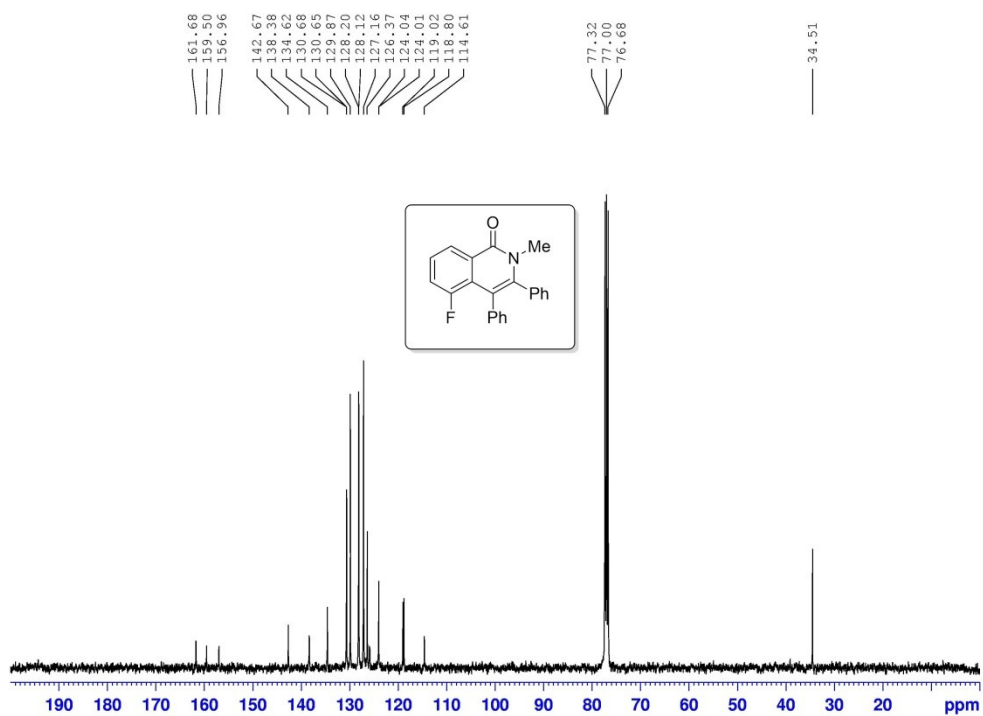

<sup>1</sup>H and <sup>13</sup>C NMR spectra of compound **3qa**.

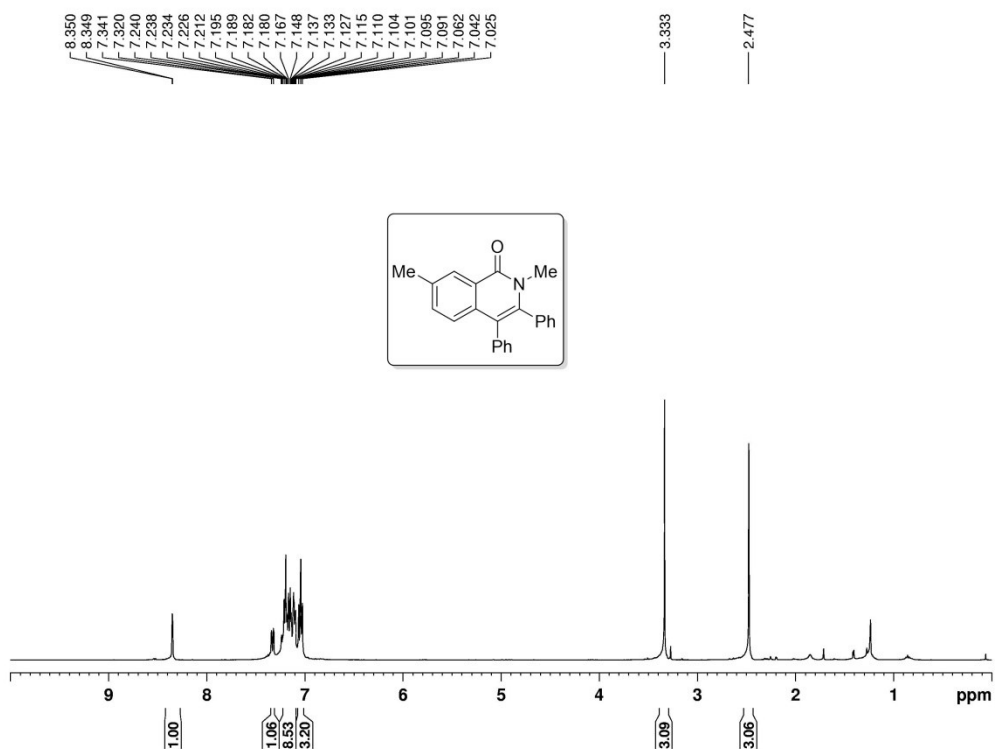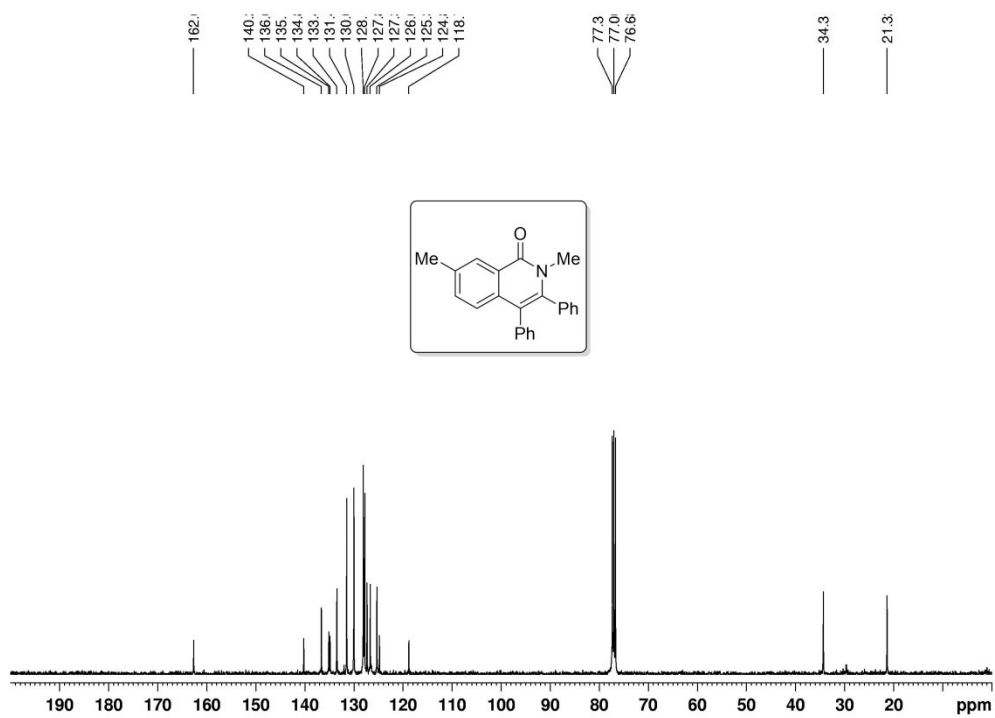

$^1\text{H}$  and  $^{13}\text{C}$  NMR spectra of compound **3ra**.

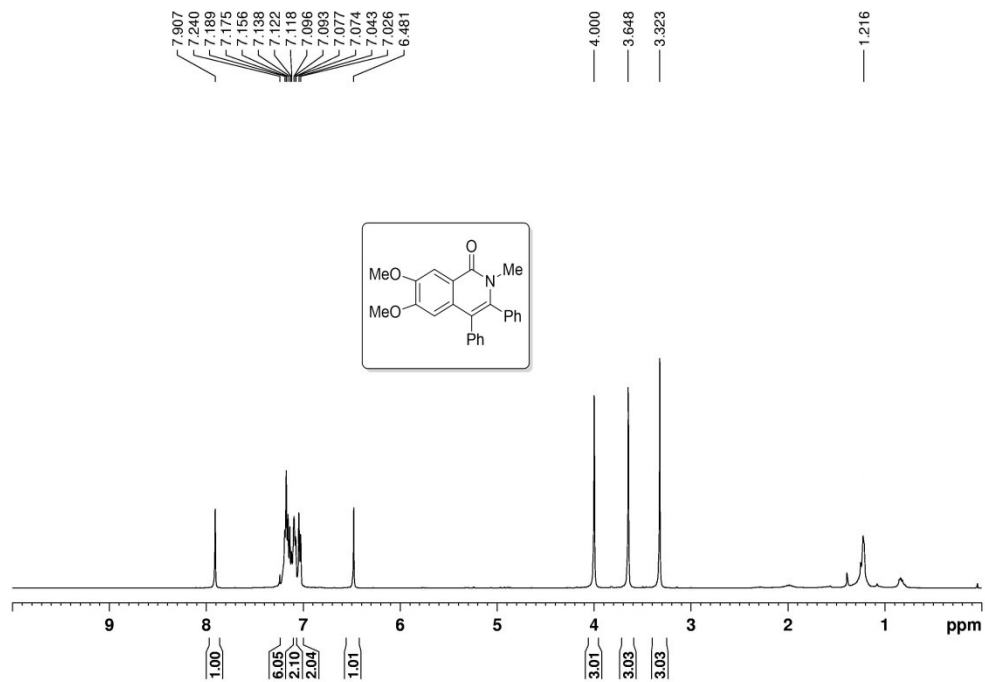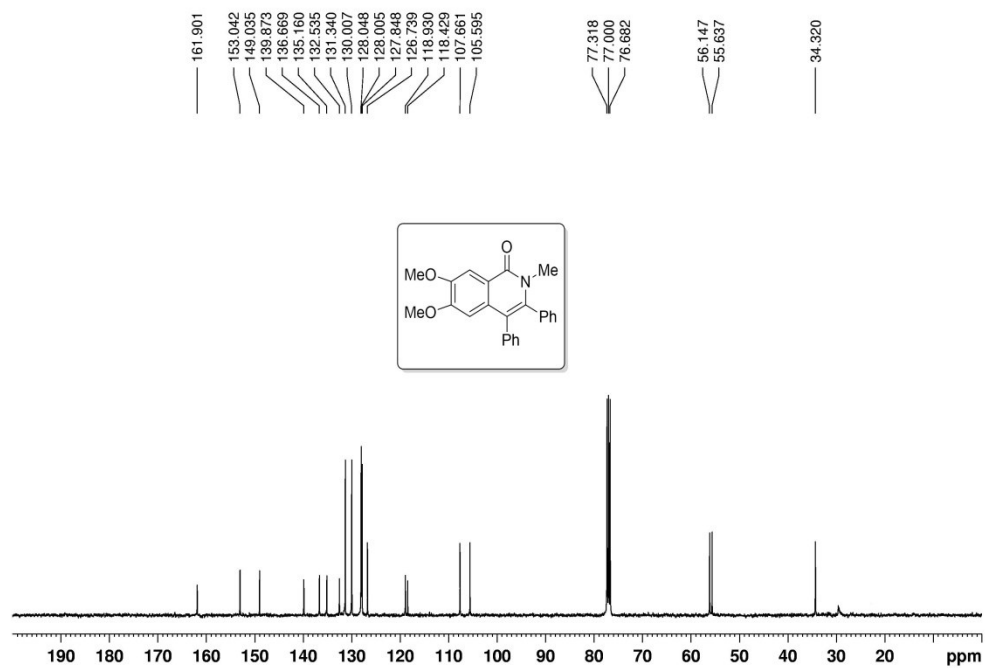

<sup>1</sup>H and <sup>13</sup>C NMR spectra of compound 3sa

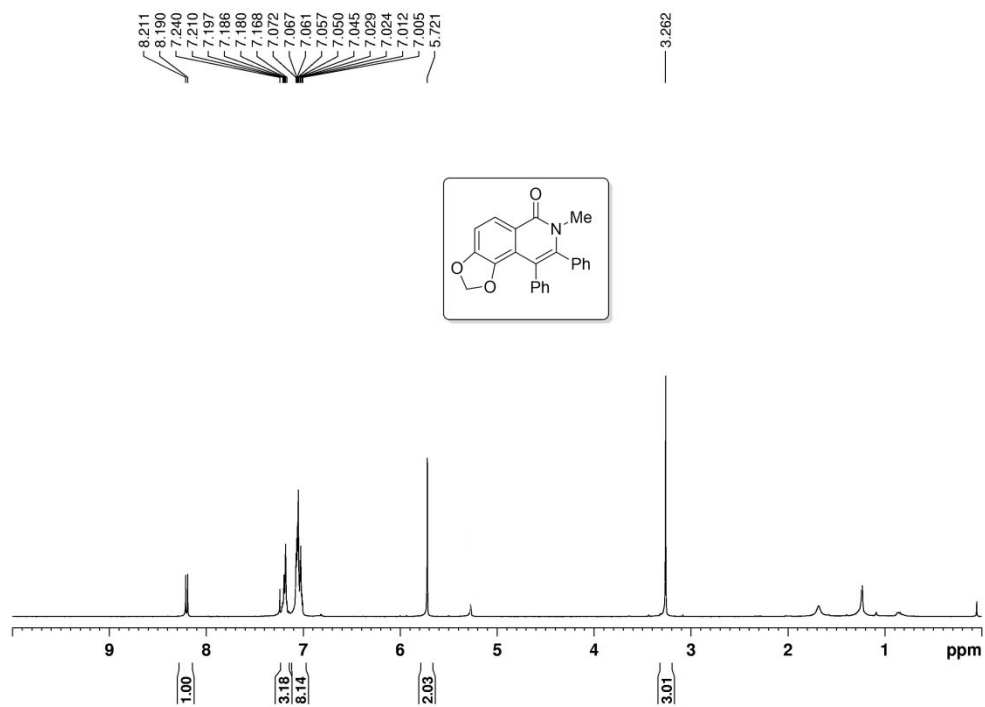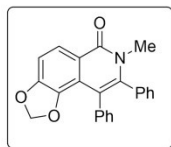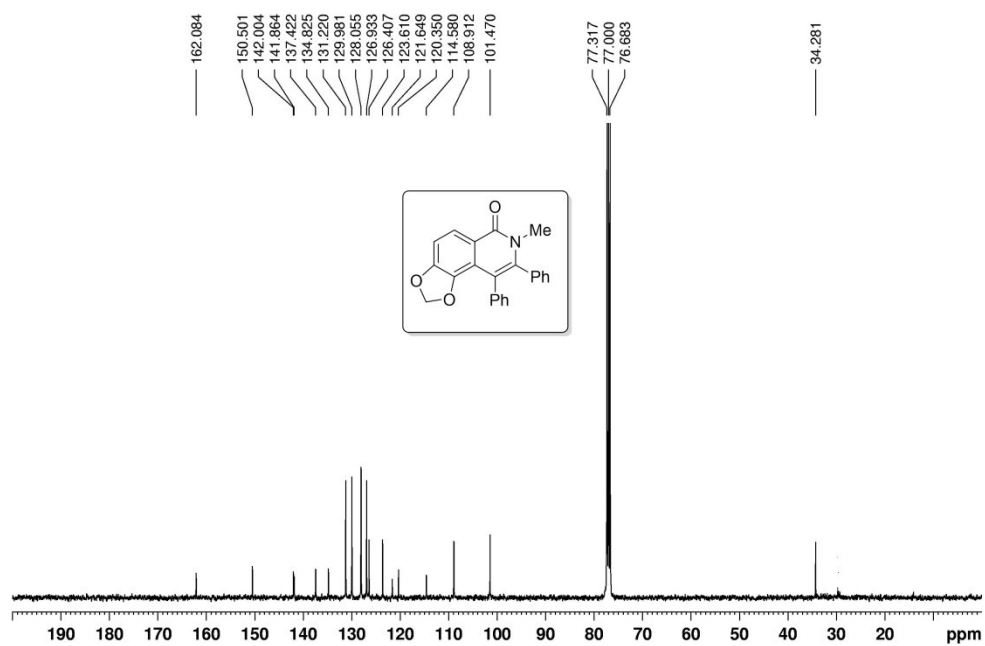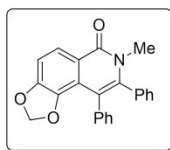

$^1\text{H}$  and  $^{13}\text{C}$  NMR spectra of compound **3ab**.

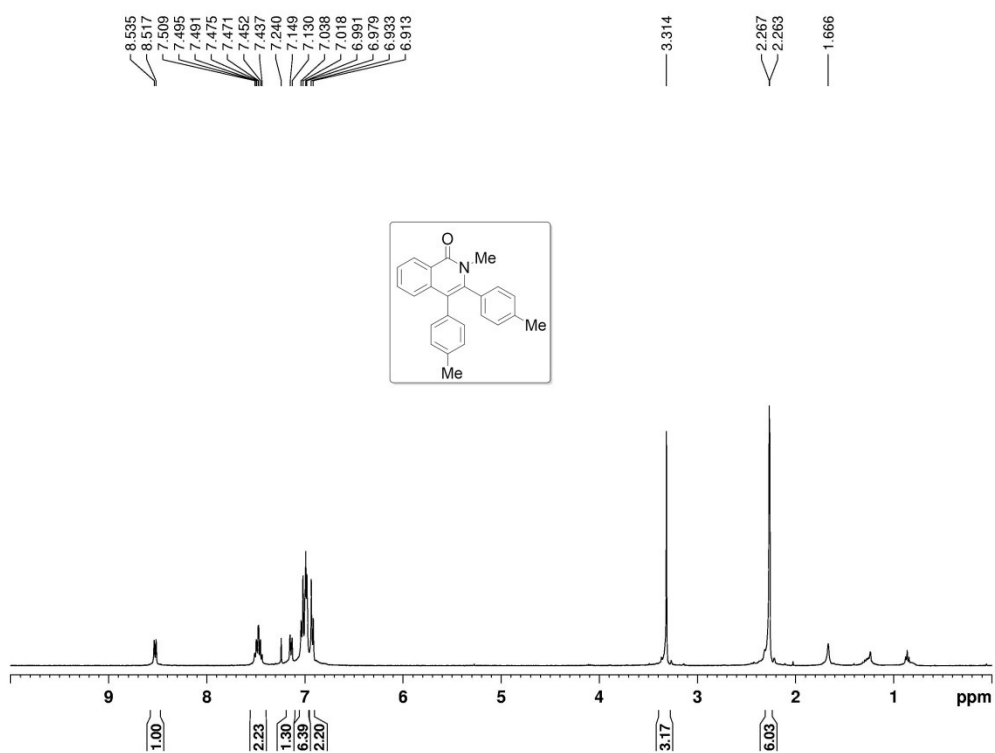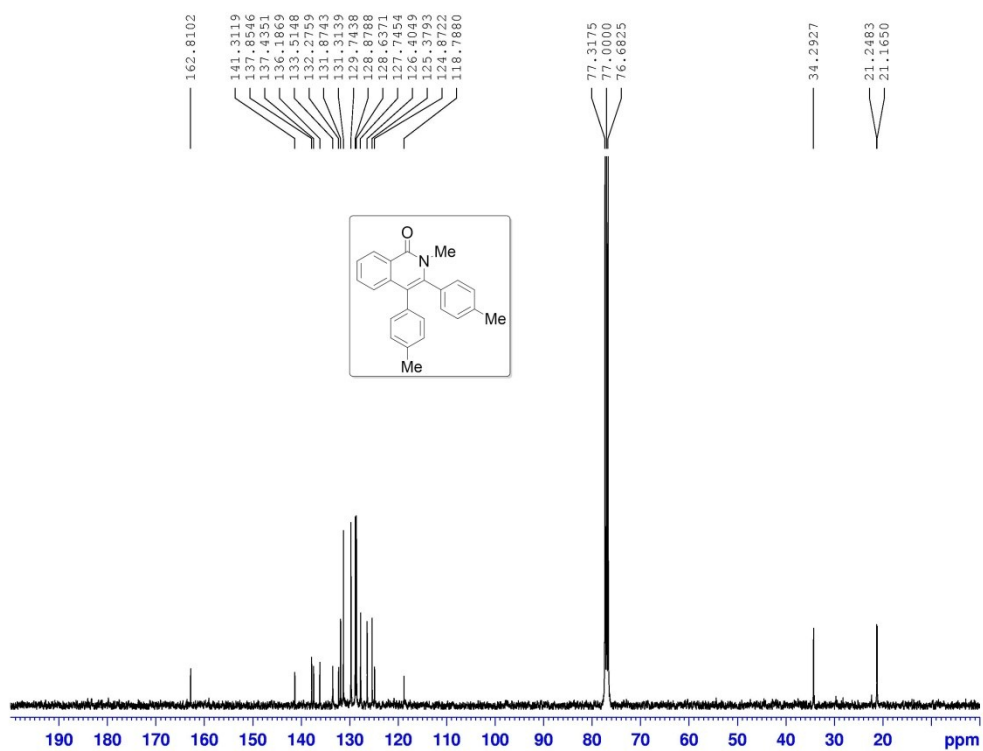

<sup>1</sup>H and <sup>13</sup>C NMR spectra of compound **3ac**.

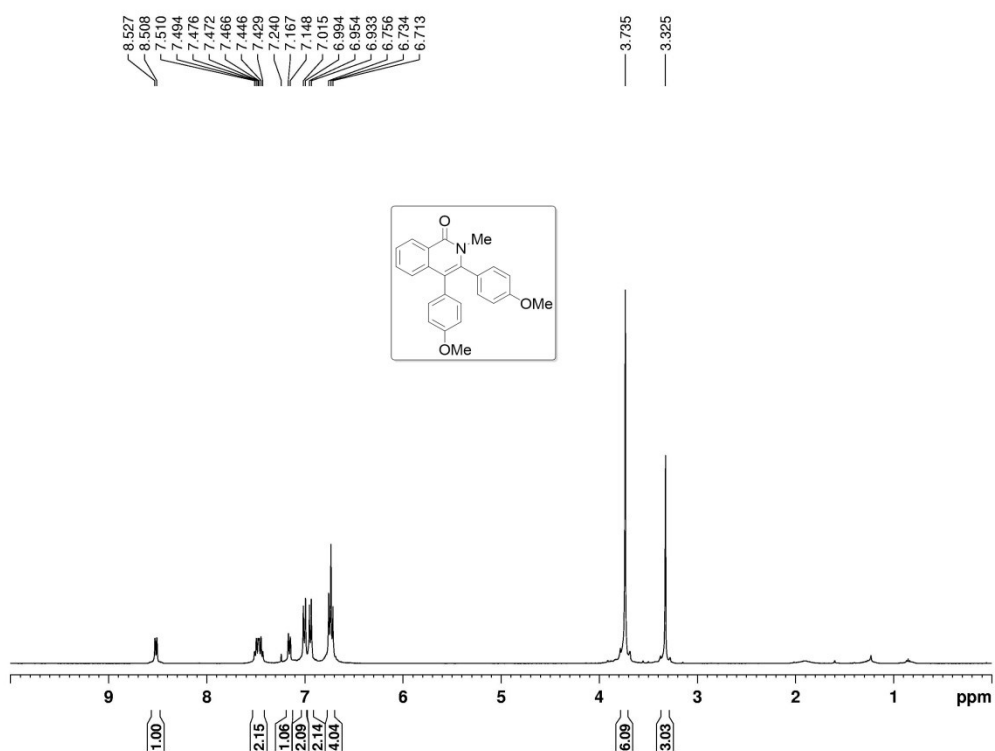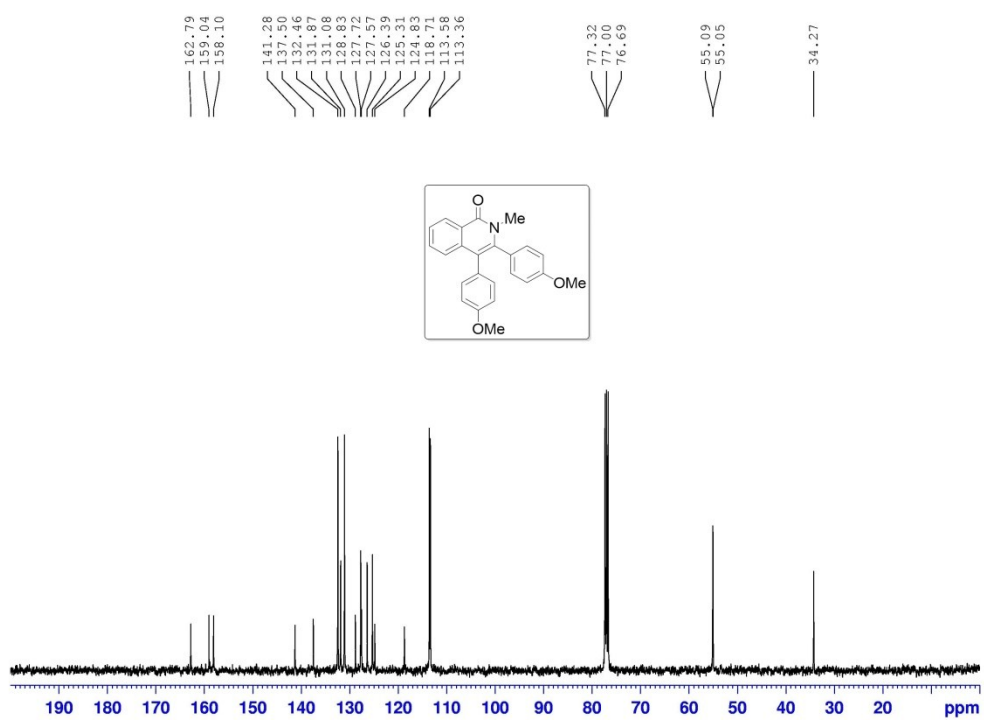

<sup>1</sup>H and <sup>13</sup>C NMR spectra of compound **3ad**.

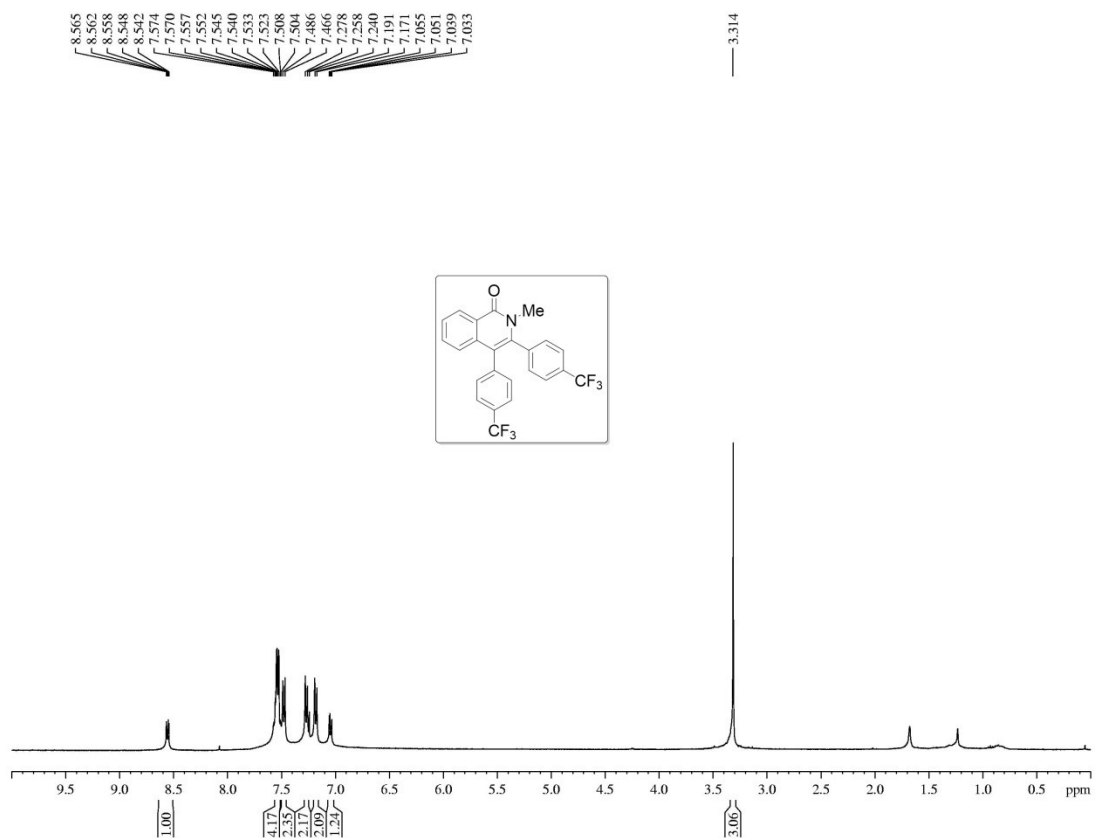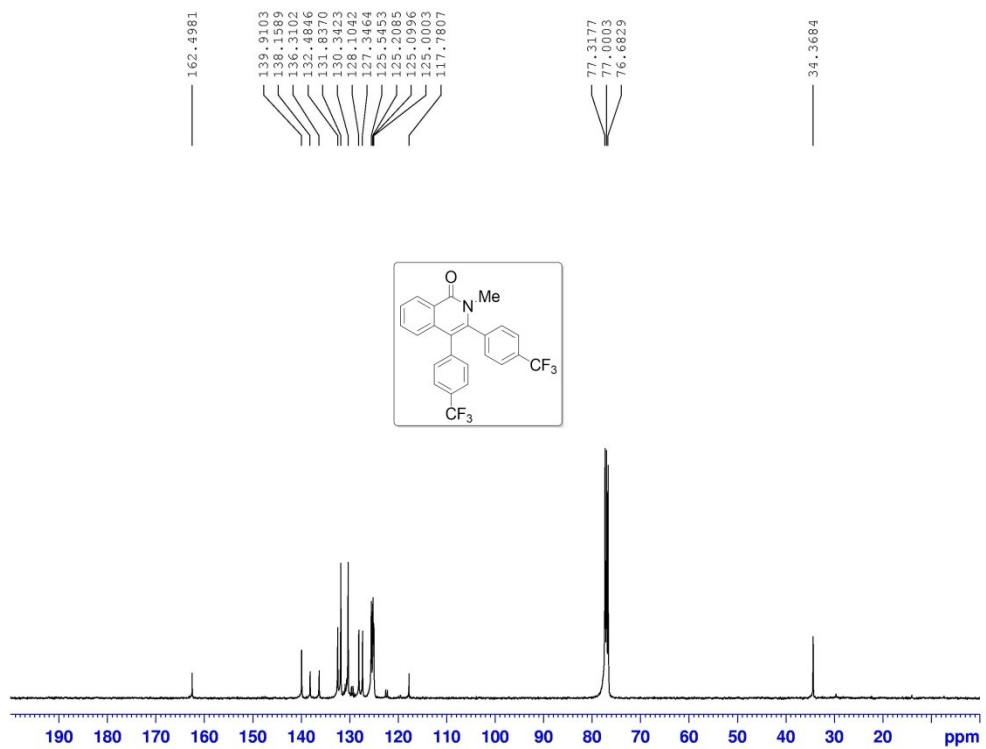

<sup>1</sup>H and <sup>13</sup>C NMR spectra of compound **3ae**.



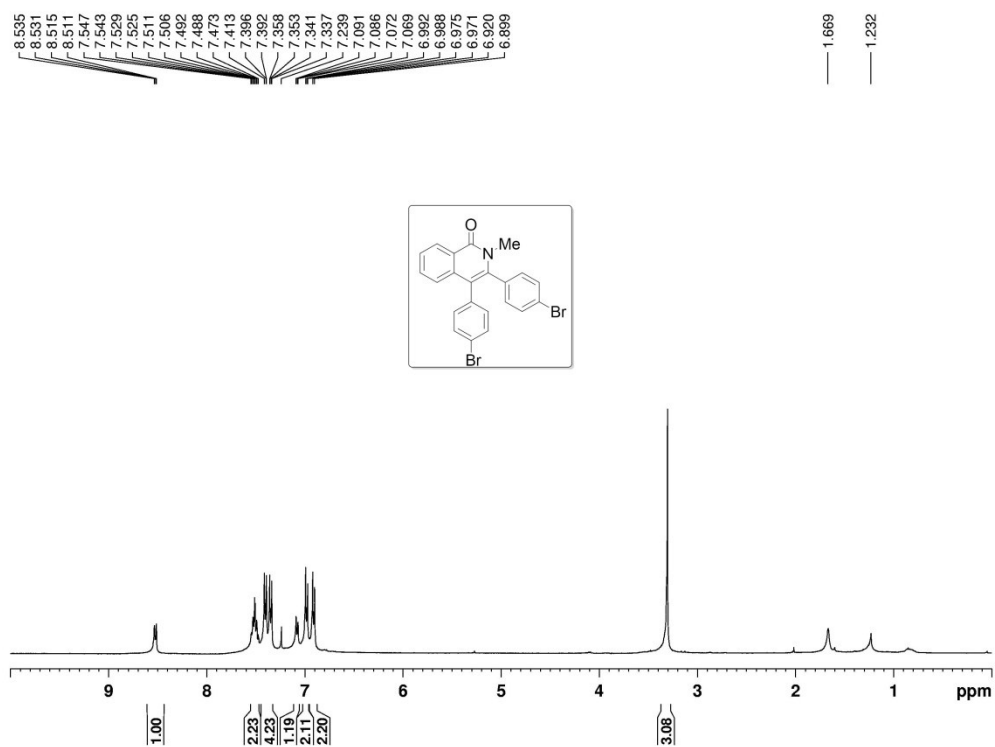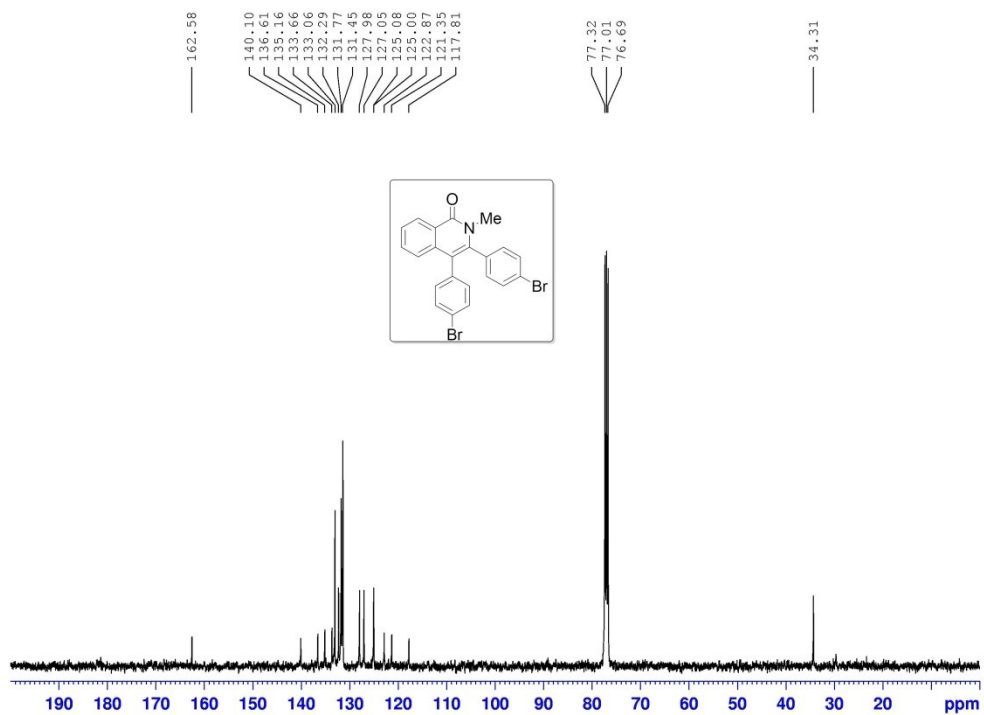

<sup>1</sup>H and <sup>13</sup>C NMR spectra of compound 3af.

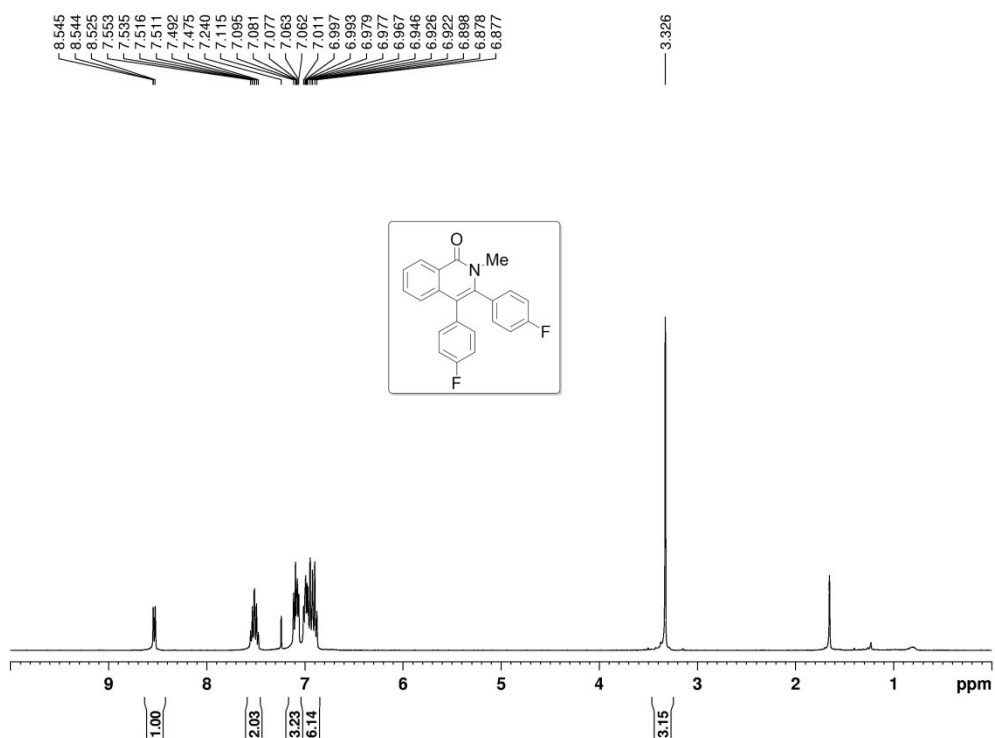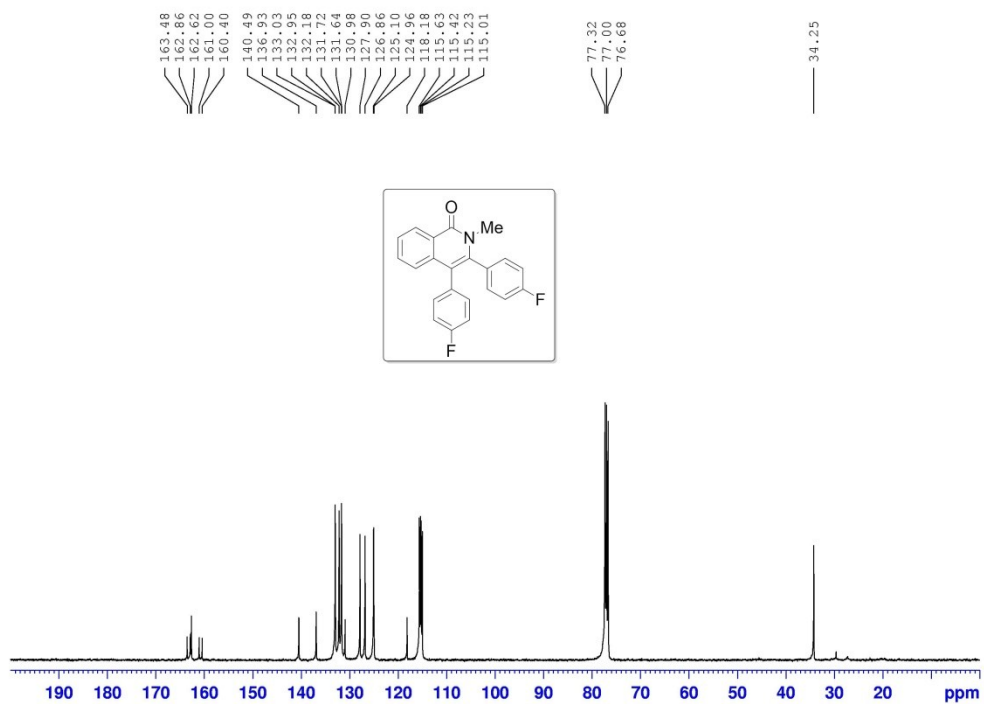

<sup>1</sup>H and <sup>13</sup>C NMR spectra of compound **3ag**.

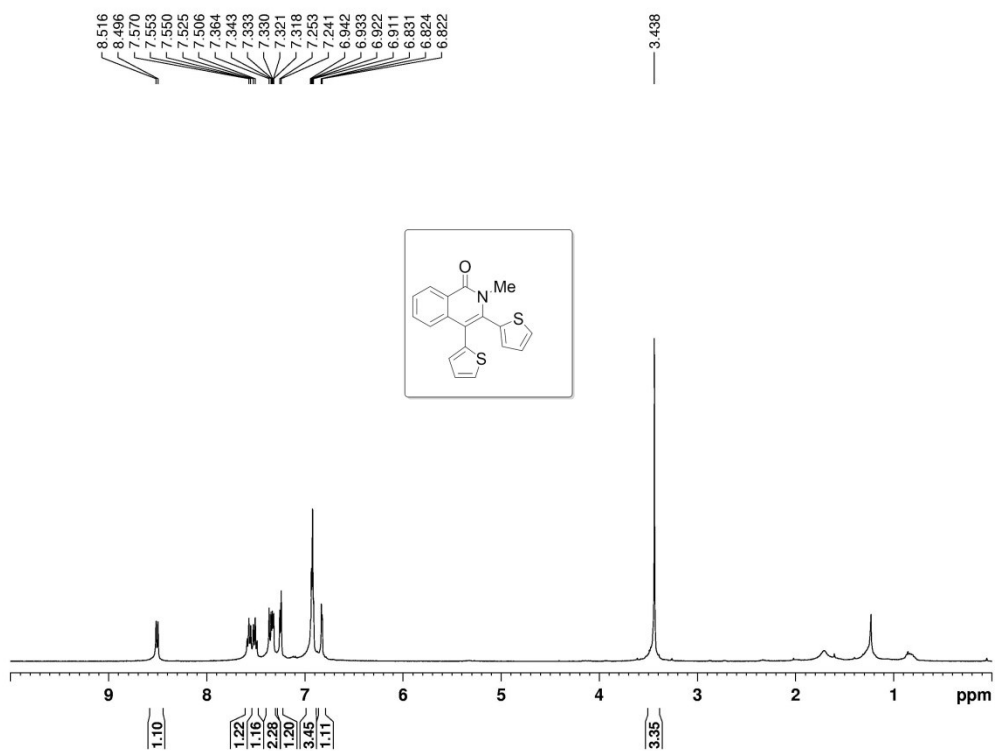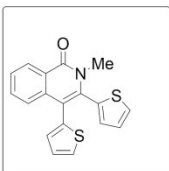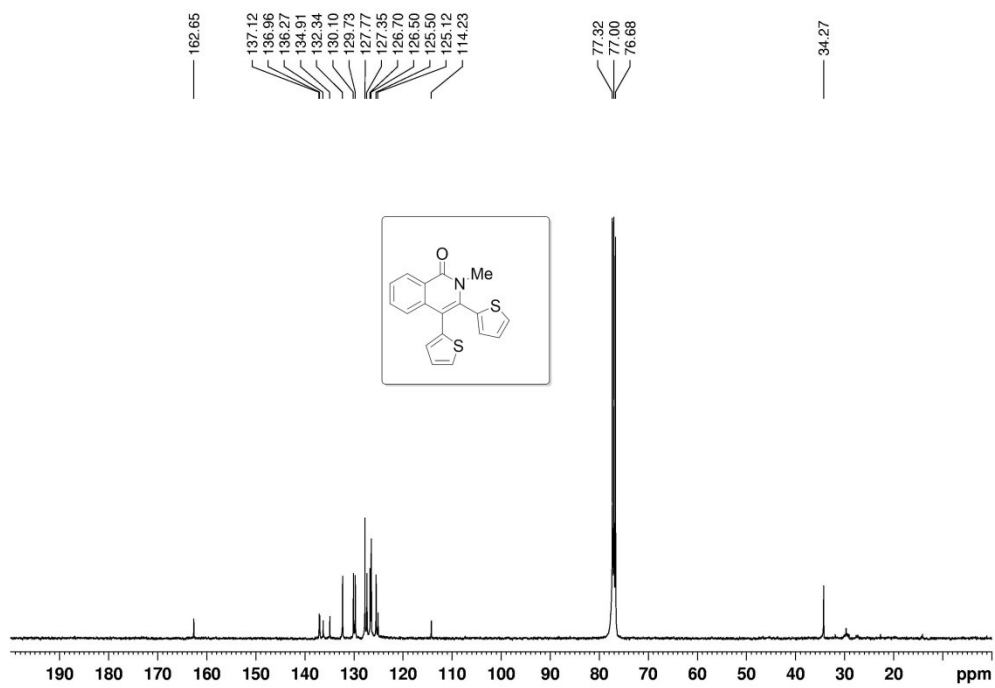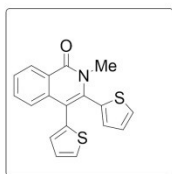

$^1\text{H}$  and  $^{13}\text{C}$  NMR spectra of compound **3ah**.

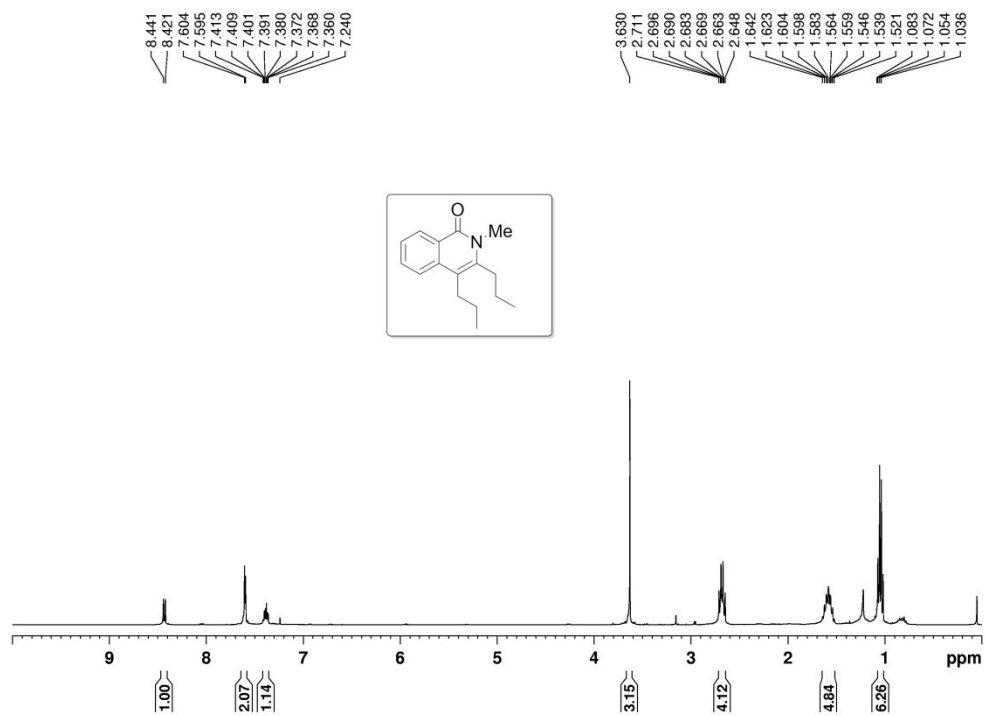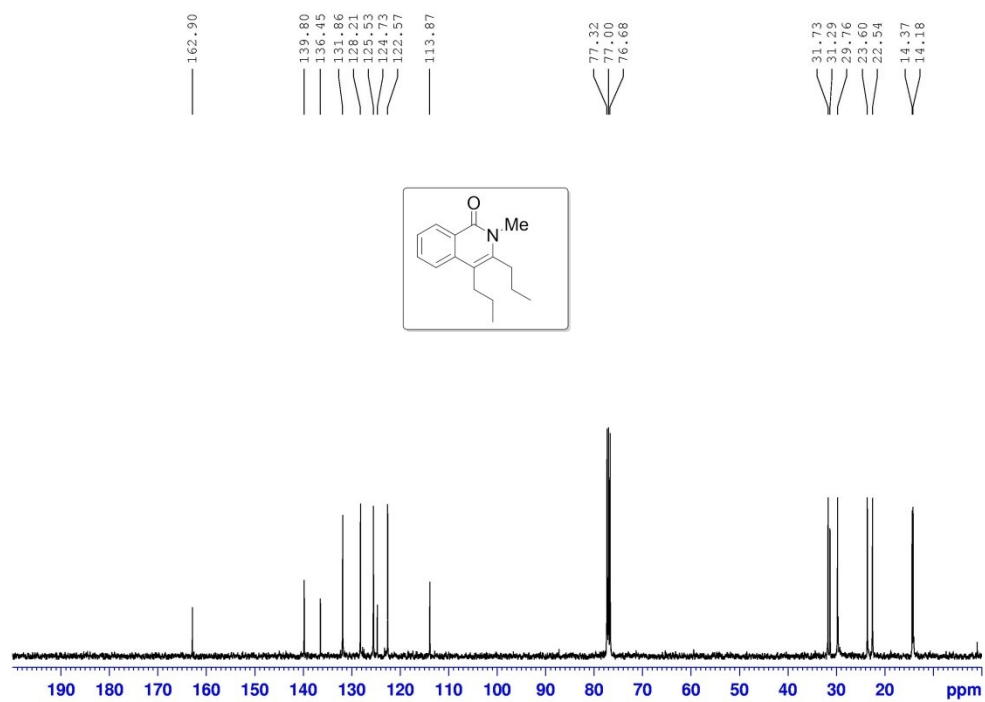

<sup>1</sup>H and <sup>13</sup>C NMR spectra of compound 3ai.

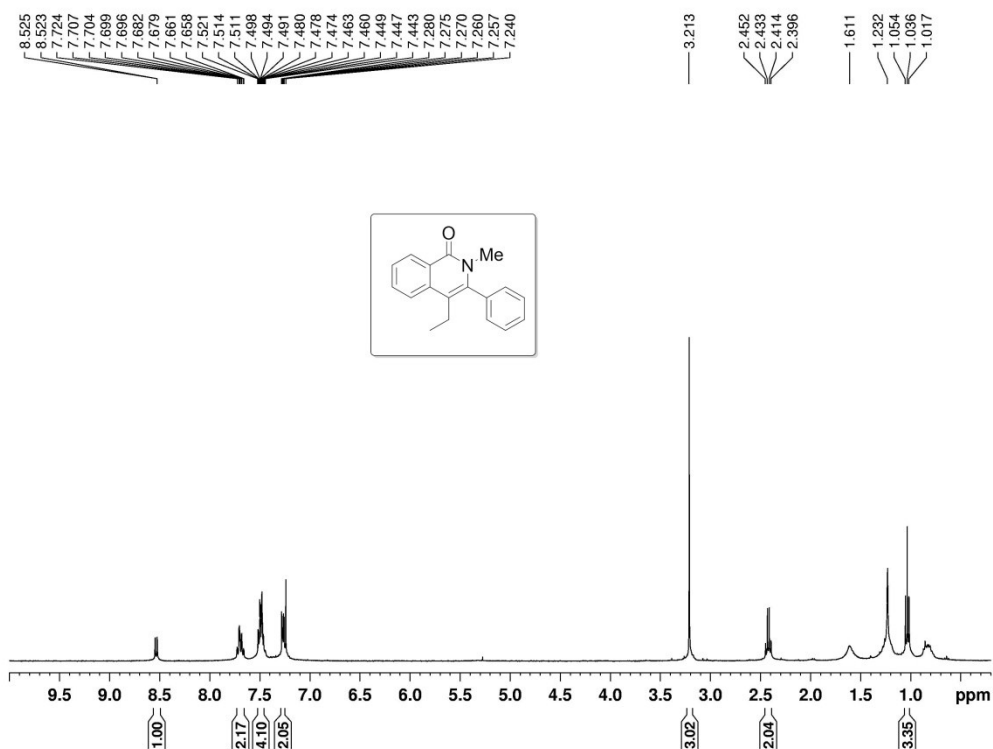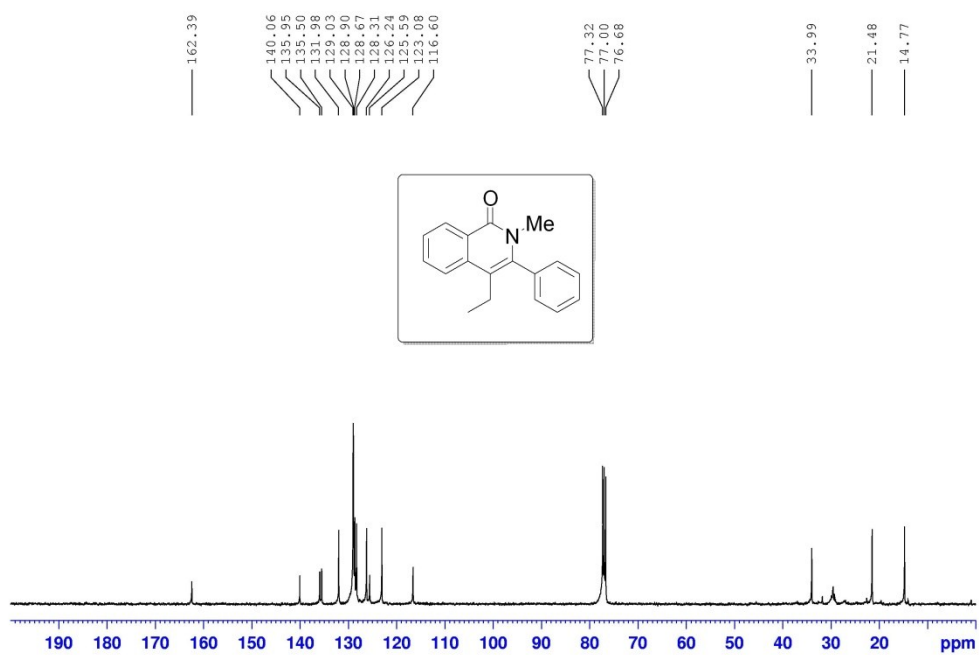

<sup>1</sup>H and <sup>13</sup>C NMR spectra of compound **3aj**

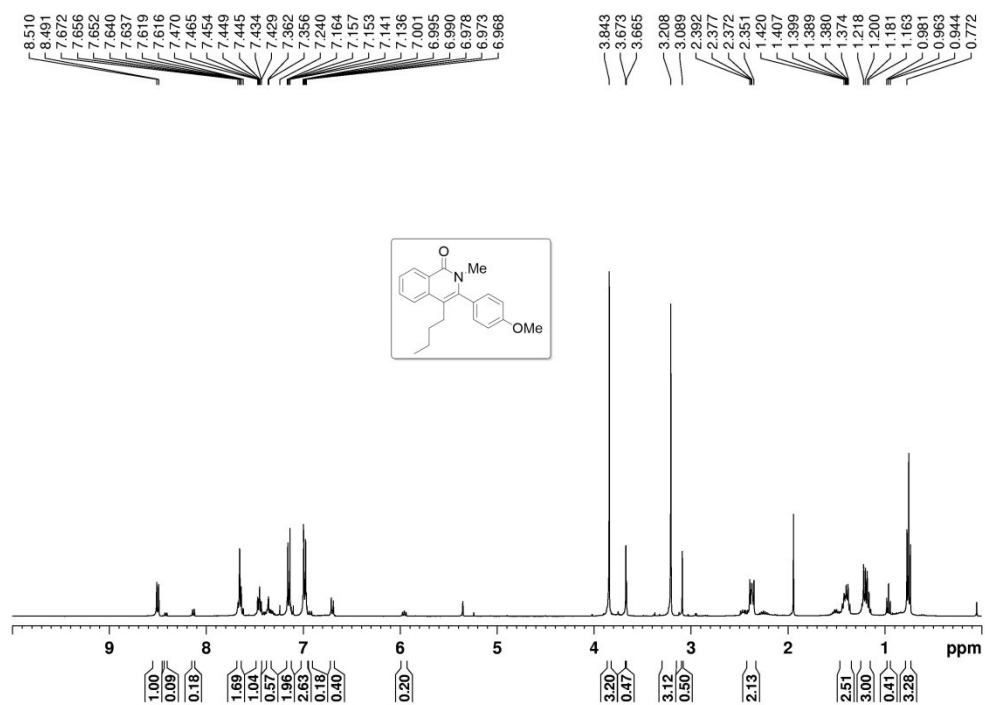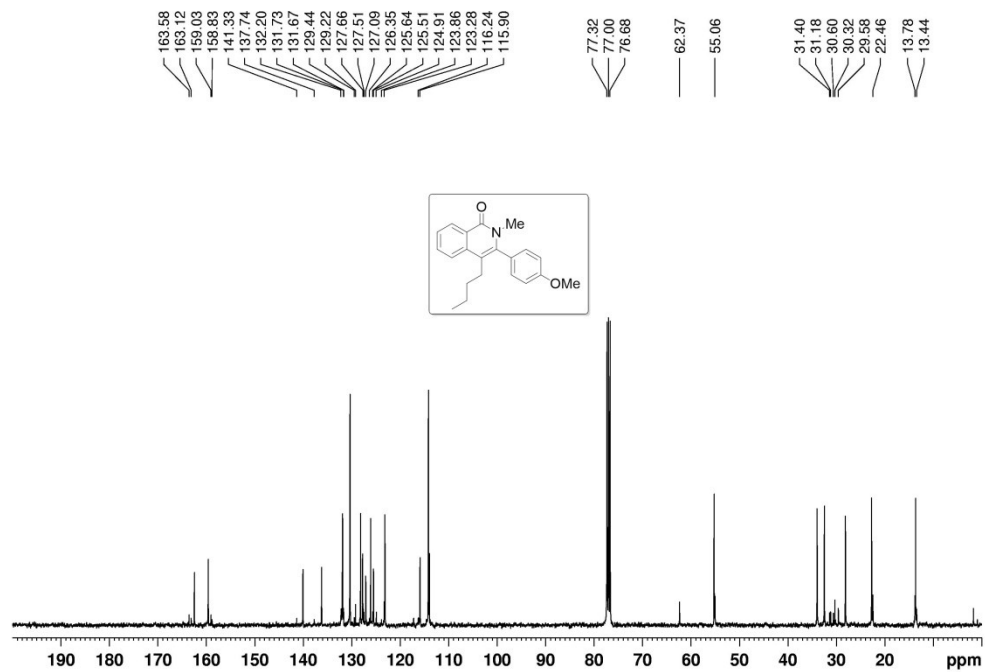

<sup>1</sup>H and <sup>13</sup>C NMR spectra of compound **3ak**

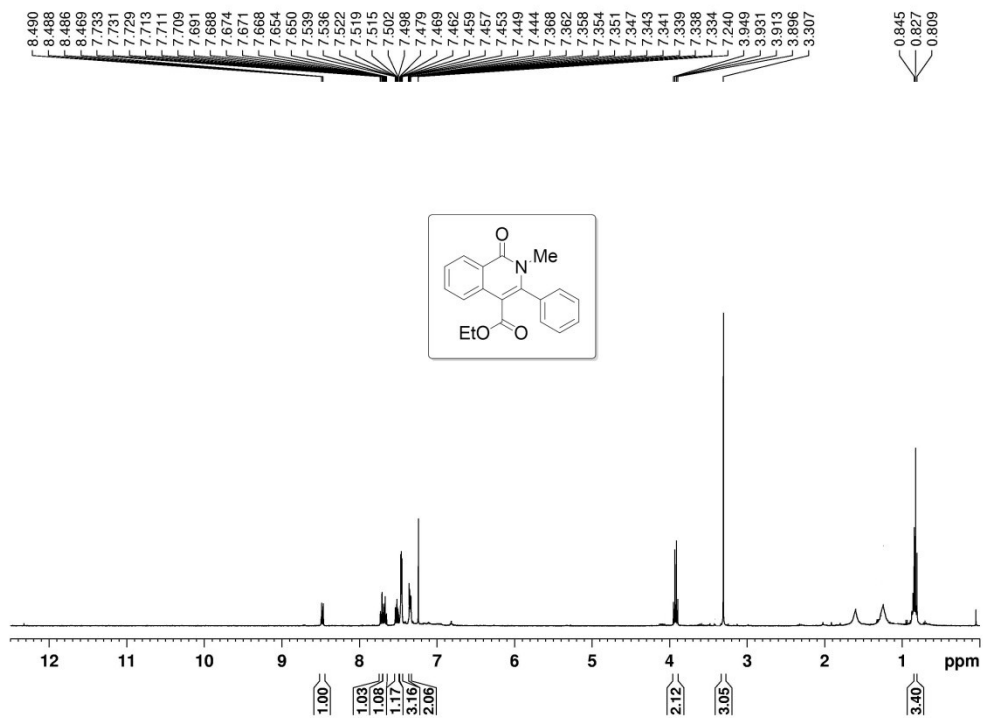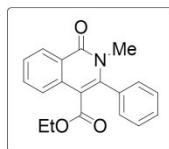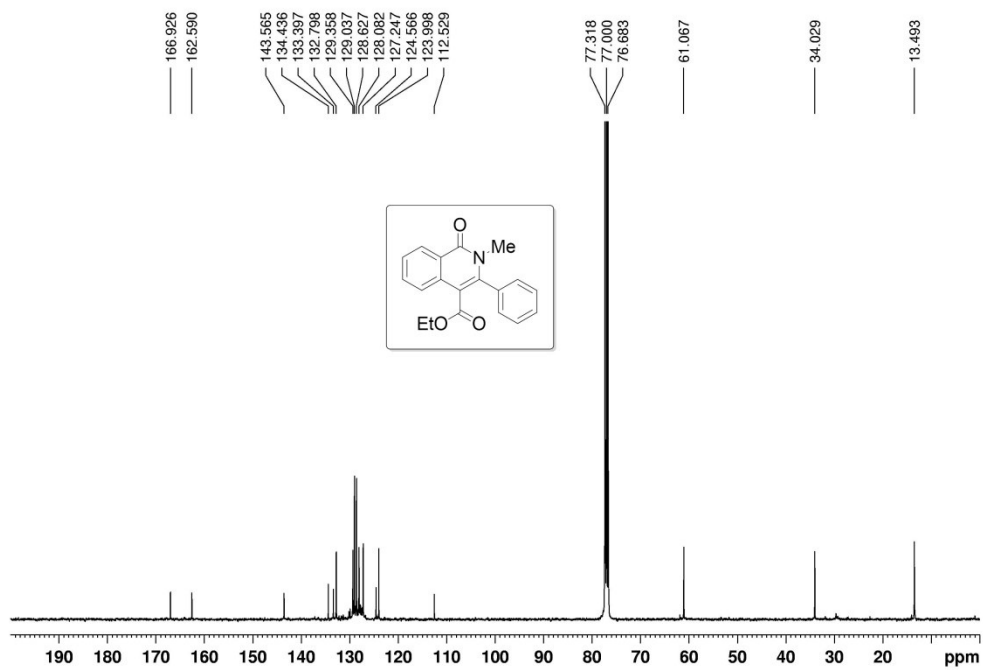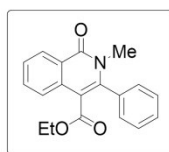

$^1\text{H}$  and  $^{13}\text{C}$  NMR spectra of compound **3fl**.

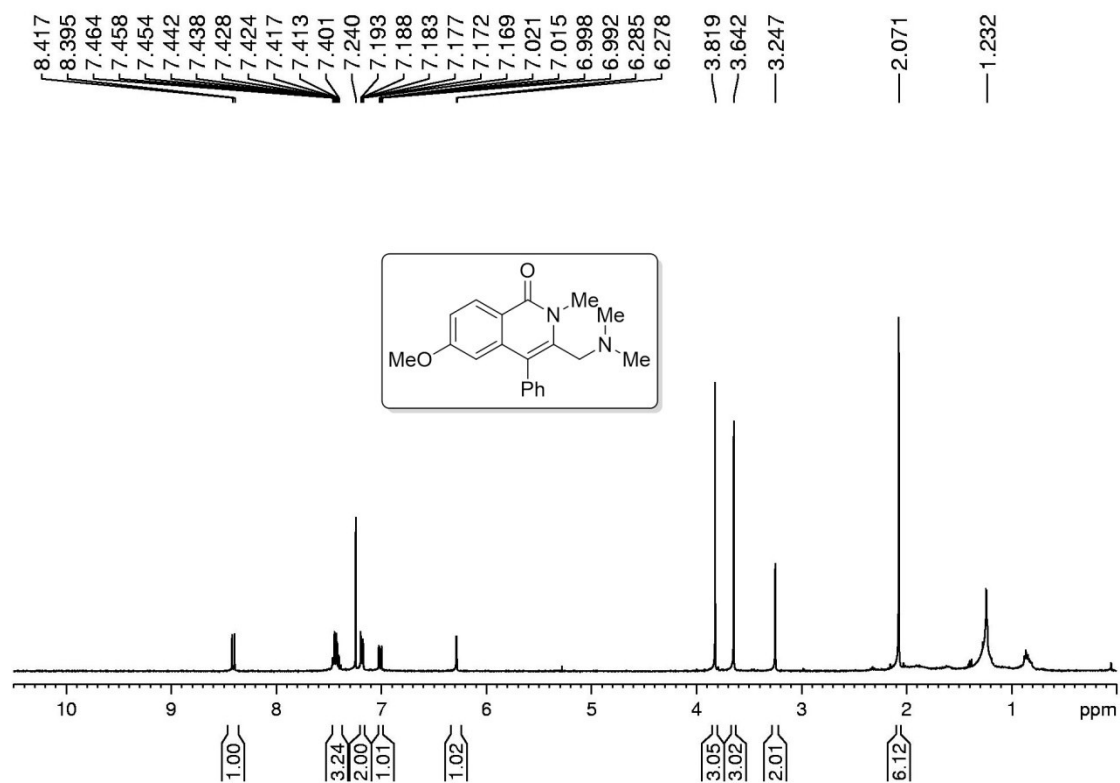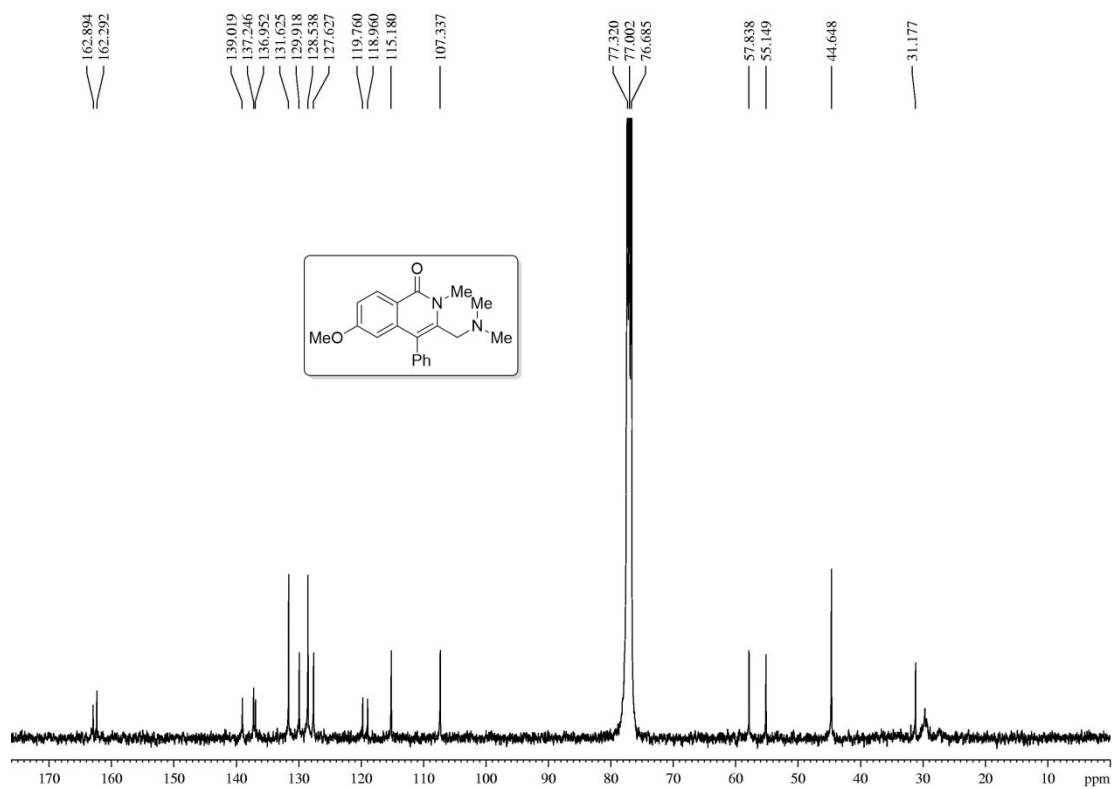

$^1\text{H}$  and  $^{13}\text{C}$  NMR spectra of compound **3ta**.



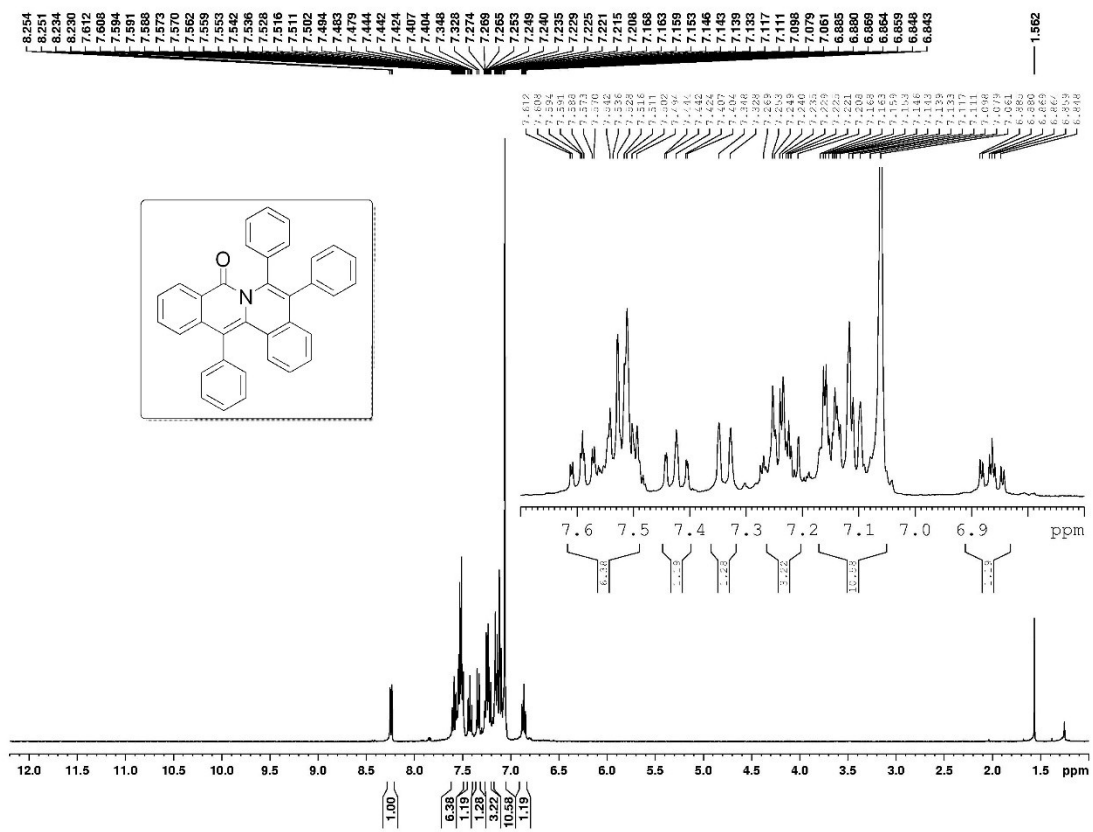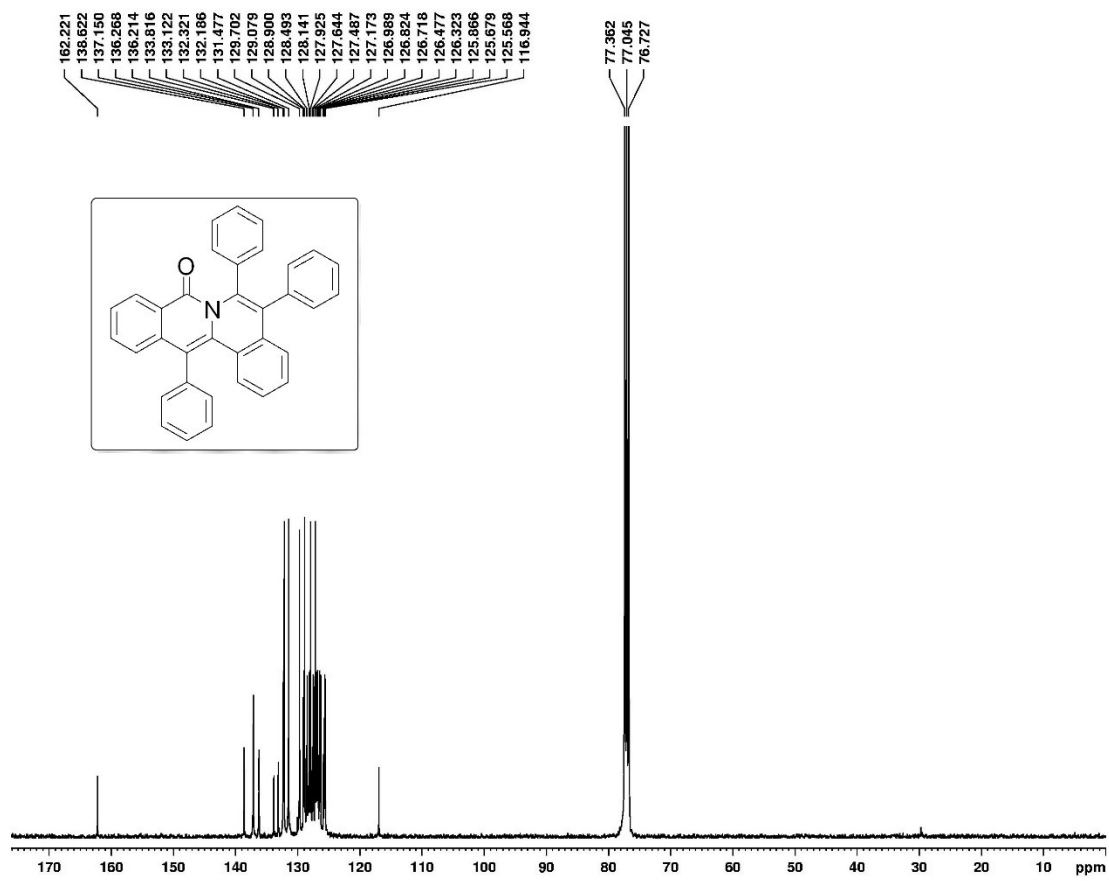

ORTEP diagram of compound 3aa

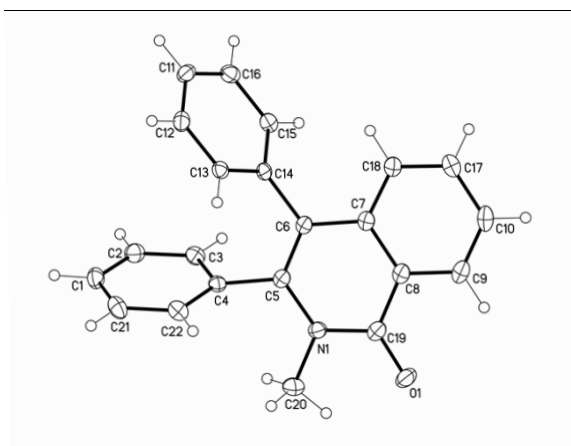

Table 1. Crystal data and structure refinement for mo\_150714lt\_0m (**3aa**).

|                                   |                                                           |
|-----------------------------------|-----------------------------------------------------------|
| Identification code               | mo_150714lt_0m                                            |
| Empirical formula                 | C <sub>22</sub> H <sub>17</sub> N O                       |
| Formula weight                    | 311.36                                                    |
| Temperature                       | 100(2) K                                                  |
| Wavelength                        | 0.71073 Å                                                 |
| Crystal system                    | Triclinic                                                 |
| Space group                       | P -1                                                      |
| Unit cell dimensions              | a = 9.3178(12) Å<br>b = 9.5222(12) Å<br>c = 10.9385(14) Å |
| Volume                            | 789.02(18) Å <sup>3</sup>                                 |
| Z                                 | 2                                                         |
| Density (calculated)              | 1.311 Mg/m <sup>3</sup>                                   |
| Absorption coefficient            | 0.080 mm <sup>-1</sup>                                    |
| F(000)                            | 328                                                       |
| Crystal size                      | 0.20 x 0.20 x 0.15 mm <sup>3</sup>                        |
| Theta range for data collection   | 2.102 to 26.485°.                                         |
| Index ranges                      | -11 ≤ h ≤ 8, -11 ≤ k ≤ 11, -13 ≤ l ≤ 13                   |
| Reflections collected             | 12357                                                     |
| Independent reflections           | 3208 [R(int) = 0.0214]                                    |
| Completeness to theta = 25.242°   | 99.3 %                                                    |
| Absorption correction             | Semi-empirical from equivalents                           |
| Max. and min. transmission        | 0.9485 and 0.8621                                         |
| Refinement method                 | Full-matrix least-squares on F <sup>2</sup>               |
| Data / restraints / parameters    | 3208 / 0 / 218                                            |
| Goodness-of-fit on F <sup>2</sup> | 1.043                                                     |

|                                      |                                    |
|--------------------------------------|------------------------------------|
| Final R indices [ $I > 2\sigma(I)$ ] | R1 = 0.0354, wR2 = 0.0897          |
| R indices (all data)                 | R1 = 0.0422, wR2 = 0.0944          |
| Extinction coefficient               | n/a                                |
| Largest diff. peak and hole          | 0.277 and -0.191 e.Å <sup>-3</sup> |

ORTEP diagram of compound **3ak**

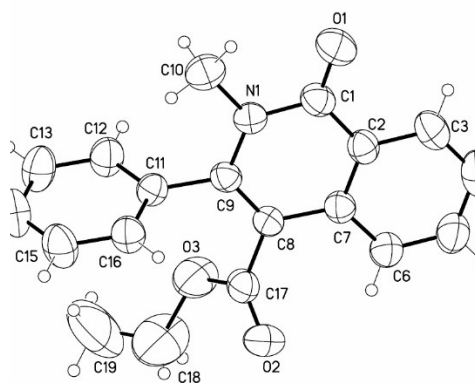

Table 2. Crystal data and structure refinement for mo\_160743\_0m\_a (**3ak**).

|                                 |                                                          |
|---------------------------------|----------------------------------------------------------|
| Identification code             | mo_160743_0m_a                                           |
| Empirical formula               | C <sub>19</sub> H <sub>17</sub> N O <sub>3</sub>         |
| Formula weight                  | 307.33                                                   |
| Temperature                     | 296(2) K                                                 |
| Wavelength                      | 0.71073 Å                                                |
| Crystal system                  | Monoclinic                                               |
| Space group                     | P 21/c                                                   |
| Unit cell dimensions            | a = 9.4992(7) Å<br>b = 12.0176(9) Å<br>c = 14.7148(11) Å |
| Volume                          | 1600.6(2) Å <sup>3</sup>                                 |
| Z                               | 4                                                        |
| Density (calculated)            | 1.275 Mg/m <sup>3</sup>                                  |
| Absorption coefficient          | 0.087 mm <sup>-1</sup>                                   |
| F(000)                          | 648                                                      |
| Crystal size                    | 0.22 x 0.18 x 0.16 mm <sup>3</sup>                       |
| Theta range for data collection | 2.232 to 26.457°.                                        |

|                                   |                                             |
|-----------------------------------|---------------------------------------------|
| Index ranges                      | -11<=h<=11, -14<=k<=15, -18<=l<=18          |
| Reflections collected             | 13301                                       |
| Independent reflections           | 3284 [R(int) = 0.0487]                      |
| Completeness to theta = 25.242°   | 99.8 %                                      |
| Absorption correction             | Semi-empirical from equivalents             |
| Max. and min. transmission        | 0.9485 and 0.8834                           |
| Refinement method                 | Full-matrix least-squares on F <sup>2</sup> |
| Data / restraints / parameters    | 3284 / 0 / 210                              |
| Goodness-of-fit on F <sup>2</sup> | 1.030                                       |
| Final R indices [I>2sigma(I)]     | R1 = 0.0588, wR2 = 0.1424                   |
| R indices (all data)              | R1 = 0.1079, wR2 = 0.1690                   |
| Extinction coefficient            | n/a                                         |
| Largest diff. peak and hole       | 0.309 and -0.329 e.Å <sup>-3</sup>          |

ORTEP diagram of compound **3fl**

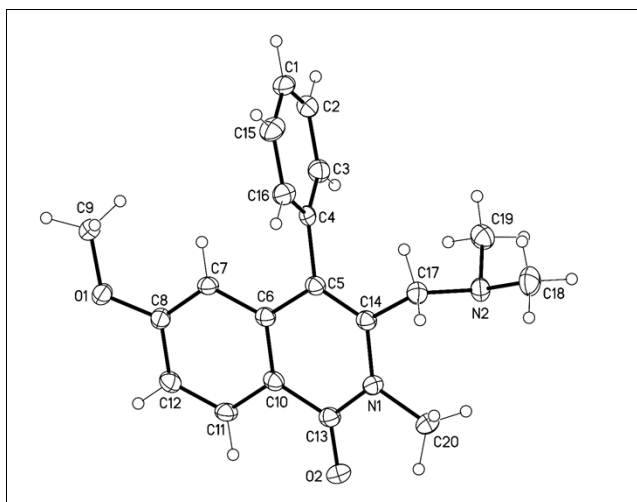

Table 3. Crystal data and structure refinement for 160602LT\_0M (**3fl**).

|                      |                                                               |
|----------------------|---------------------------------------------------------------|
| Identification code  | 160602lt_0m                                                   |
| Empirical formula    | C <sub>20</sub> H <sub>22</sub> N <sub>2</sub> O <sub>2</sub> |
| Formula weight       | 322.39                                                        |
| Temperature          | 100(2) K                                                      |
| Wavelength           | 0.71073 Å                                                     |
| Crystal system       | Monoclinic                                                    |
| Space group          | P 21/n                                                        |
| Unit cell dimensions | a=10.0712(6) Å<br>b = 9.0247(5) Å                             |

|                                        |                                                              |
|----------------------------------------|--------------------------------------------------------------|
|                                        | $c = 19.0587(9) \text{ \AA}$                                 |
| Volume                                 | $1706.90(16) \text{ \AA}^3$                                  |
| Z                                      | 4                                                            |
| Density (calculated)                   | $1.255 \text{ Mg/m}^3$                                       |
| Absorption coefficient                 | $0.082 \text{ mm}^{-1}$                                      |
| F(000)                                 | 688                                                          |
| Crystal size                           | $0.20 \times 0.18 \times 0.18 \text{ mm}^3$                  |
| Theta range for data collection        | $2.169 \text{ to } 26.406^\circ$ .                           |
| Index ranges                           | $-12 \leq h \leq 12, -11 \leq k \leq 11, -23 \leq l \leq 23$ |
| Reflections collected                  | 14501                                                        |
| Independent reflections                | 3493 [R(int) = 0.0362]                                       |
| Completeness to theta = $25.242^\circ$ | 99.8 %                                                       |
| Absorption correction                  | Semi-empirical from equivalents                              |
| Max. and min. transmission             | 0.9485 and 0.8976                                            |
| Refinement method                      | Full-matrix least-squares on $F^2$                           |
| Data / restraints / parameters         | 3493 / 0 / 221                                               |
| Goodness-of-fit on $F^2$               | 1.076                                                        |
| Final R indices [ $I > 2\sigma(I)$ ]   | R1 = 0.0424, wR2 = 0.1059                                    |
| R indices (all data)                   | R1 = 0.0539, wR2 = 0.1133                                    |
| Extinction coefficient                 | n/a                                                          |
| Largest diff. peak and hole            | 0.325 and $-0.327 \text{ e.\AA}^{-3}$                        |
